# Supplementary material for: Satellite imaging reveals increased proportion of population exposed to floods
Source: Springer Nature journal article supplement (doi:10.1038/s41586-021-03695-w), 2021-08-04
Supplement: MOESM2 [file 41586_2021_3695_MOESM2_ESM.xlsx]

## Sheet: Sheet1
DFO_event_ID	threshold_type	glide_index	dfo_country	dfo_other_country	dfo_centroid_x	dfo_centroid_y	dfo_began	dfo_ended	dfo_validation	dfo_dead	dfo_displaced	dfo_cause	dfo_severity	gfd_area_km2	gfd_population_exposed
1586	otsu	0	Australia	0	143.698	-31.2681	2000-02-18	2000-03-01	News	1	200	Heavy rain	2	316.73	38
1587	otsu	0	Madagascar	0	47.2957	-15.7826	2000-02-17	2000-03-11	News	200	800000	Tropical Storm, Surge	1	228.5	4594
1595	otsu	0	Romania	Hungary	22.4154	46.7637	2000-04-05	2000-04-25	News	10	623	Snowmelt, Ice, Rain	2	89.1	3093
1614	otsu	0	Thailand	Vietnam	105.064	11.2426	2000-07-11	2000-08-10	News	33	25000	Heavy rain	1	4322.47	544758
1627	otsu	0	China	Russia	132.058	43.7739	2000-08-30	2000-09-10	News	31	14140	Tropical Storm, Surge	1	740.33	785363
1631	std	0	China	0	113.483	25.2293	2000-09-01	2000-09-06	News	47	46000	Heavy rain	1	102.25	18
1641	otsu	0	India	0	88.5453	24.0841	2000-09-18	2000-10-21	News	1468	24000000	Heavy rain	2	15273.6	7481712
1725	std	0	Russia	0	106.619	58.4897	2001-05-12	2001-06-08	News	7	70000	Snowmelt, Ice, Rain	2	35430.1	57438
1747	otsu	0	India	0	84.7987	21.0559	2001-07-08	2001-08-10	News	100	2000000	Heavy rain	2	465.08	208434
1772	std	0	Sudan	Ethiopia	34.4277	14.9967	2001-08-06	2001-09-13	News	5	45000	Heavy rain	1	1384.61	11849
1778	otsu	0	Chad	0	16.2605	9.32666	2001-08-19	2001-10-11	News	100	40000	Heavy rain	1	3913.15	77674
1781	std	0	Cambodia	Vietnam	105.382	11.7684	2001-08-15	2001-11-19	News	416	1060000	Heavy rain	2	26908.5	2100497
1789	otsu	0	India	0	83.0513	26.7556	2001-08-20	2001-09-11	News	65	300000	Heavy rain	1	4464.14	1701849
1791	std	0	India	0	84.87	26.5321	2001-09-07	2001-09-24	News	146	30000	Heavy rain	1	4077.14	250633
1793	std	0	Guinea	Mali	-9.22709	10.5493	2001-08-18	2001-10-09	News	11	43500	Heavy rain	2	908	1575
1810	std	0	Argentina	0	-61.2148	-32.8972	2001-10-01	2001-12-01	News	2	14500	Heavy rain	2	16681.2	5740
1818	std	0	Nicaragua	0	-80.2017	22.3394	2001-10-26	2001-11-15	News	19	27118340	Tropical Storm, Surge	1	723.48	3815
1820	std	0	Somalia	0	42.5089	0.491533	2001-11-01	2001-11-14	News	0	6000	Heavy rain	1	0.06	0
1829	std	0	USA	0	-89.8684	35.1833	2001-11-28	2001-12-07	News	1	400	Heavy rain	1	1370.75	2244
1840	std	0	USA	0	-91.7958	34.9309	2001-12-17	2001-12-25	News	3	100	Heavy rain	1	4108.41	5975
1885	std	0	Brazil	0	-50.4819	-11.8781	2002-01-15	2002-04-02	News	0	0	Heavy rain	1	3531.56	1202
1907	std	0	Ethiopia	0	43.0631	7.3106	2002-04-16	2002-04-21	News	0	4000	Heavy rain	1	233.31	2
1908	std	0	Bangladesh	0	91.52	24.9818	2002-04-18	2002-04-29	News	0	0	Dam	1	1.47	0
1910	std	0	Russia	0	67.2446	58.0454	2002-04-22	2002-05-07	News	0	6000	Snowmelt, Ice, Rain	1	16267.1	15715
1917	std	0	Democratic Republic of Congo	0	33.5441	-0.075707	2002-04-26	2002-05-28	News	160	168000	Heavy rain	2	3961.18	43575
1919	std	0	USA	0	-88.2883	39.1954	2002-05-07	2002-06-08	News	9	100	Heavy rain	1	2879.29	2725
1921	std	0	Russia	0	64.5783	58.6923	2002-05-07	2002-06-06	News	0	1000	Heavy rain	1	7360	2804
1925	std	0	Paraguay	0	-57.811	-26.6767	2002-05-06	2002-05-28	News	0	1000	Heavy rain	1	2757.81	1752
1931	std	0	Russia	0	131.95	62.8807	2002-05-24	2002-06-01	News	0	1500	Snowmelt, Ice, Rain	1	3835.53	199
1938	std	0	Syria	0	36.33	35.6527	2002-06-04	2002-06-06	News	22	8000	Dam	1	243.96	8494
1939	std	0	Uruguay	0	-55.9505	-32.4864	2002-04-23	2002-05-09	News	0	3600	Heavy rain	1	3700.46	6199
1943	std	0	USA	0	-95.9064	47.3407	2002-06-08	2002-06-29	News	0	0	Heavy rain	2	871.21	910
1951	std	0	Cuba	0	-79.4307	22.0018	2002-06-12	2002-06-16	News	0	30000	Heavy rain	1	97.99	1940
1962	std	0	Russia	0	43.255	43.9929	2002-06-19	2002-07-01	News	117	200000	Heavy rain	2	734.64	3834
1971	std	0	China	0	115.253	29.6633	2002-06-30	2002-07-13	News	0	0	Heavy rain	1	8905.13	1139416
1972	std	0	USA	0	-98.3593	29.5326	2002-06-30	2002-07-23	News	9	4000	Heavy rain	2	1059.36	3423
1974	std	0	India	Bangledesh	89.2696	25.8418	2002-06-21	2002-08-28	News	503	15000000	Heavy rain	1	27063.5	7191176
1977	std	0	Colombia	0	-70.7849	7.05922	2002-07-05	2002-07-08	News	0	18000	Heavy rain	1	2653.33	158
1979	std	0	USA	0	-101.738	41.0922	2002-07-06	2002-07-08	News	1	0	Heavy rain	1	624.89	499
1980	std	0	Nepal	0	83.3552	27.5752	2002-07-07	2002-07-09	News	0	0	Heavy rain	1	36.86	17
1981	std	0	Philippines	0	120.563	15.3403	2002-07-06	2002-07-19	News	61	25000	Heavy rain	1	1468.63	681578
1985	std	0	New Zealand	0	174.757	-36.9518	2002-07-12	2002-07-15	News	0	0	Heavy rain	1	79.87	8337
1991	std	0	Vietnam	0	105.254	10.5017	2002-07-15	2002-12-02	News	155	200000	Heavy rain	1	34304.4	3876647
1995	std	0	Romania	0	26.178	47.6469	2002-07-19	2002-07-23	News	5	0	Heavy rain	1	166.22	10885
1996	otsu	0	Venezuela	0	-69.3067	7.56526	2002-07-20	2002-07-31	News	5	50000	Heavy rain	1	31375	86716
1997	otsu	0	Russia	0	132.38	43.8822	2002-07-20	2002-07-26	News	0	1500	Heavy rain	1	306.4	10443
1998	otsu	0	Philippines	0	121.063	14.6693	2002-07-20	2002-07-28	News	18	7000	Tropical Storm, Surge	1	975.35	401020
1999	otsu	0	Nepal	0	85.3065	27.6961	2002-07-21	2002-08-15	News	380	250000	Heavy rain	1	33386.7	16541422
2007	otsu	0	USA	0	-156.216	62.2333	2002-04-27	2002-05-31	News	0	0	Snowmelt, Ice, Rain	1	6231.31	1612
2009	std	0	South Africa	0	18.5798	-34.0133	2002-07-28	2002-08-03	News	0	2300	Heavy rain	1	34.62	15120
2019	otsu	0	China	0	116.272	24.4607	2002-08-05	2002-08-12	News	10	1500	Heavy rain	1	136.66	221995
2023	std	0	China	0	112.817	26.7781	2002-08-06	2002-08-28	News	124	270000	Heavy rain	1	6164.31	1151853
2024	std	0	Germany	0	13.0294	48.5684	2002-08-07	2002-08-28	News	55	250000	Heavy rain	2	1352.15	191126
2029	std	0	Iran	0	55.5526	37.5233	2002-08-10	2002-08-14	News	35	0	Heavy rain	1	54.79	0
2035	std	0	Vietnam	0	104.679	22.5644	2002-08-14	2002-08-22	News	29	80000	Heavy rain	2	687.28	194494
2039	std	0	Thailand	Cambodia	103.527	16.7724	2002-08-18	2002-11-26	News	65	400000	Heavy rain	2	56528	5200419
2041	std	0	Burma	0	95.7534	22.4187	2002-08-17	2002-09-04	News	0	5000	Heavy rain	2	5907.52	332167
2042	std	0	Chile	0	-72.1311	-35.8628	2002-08-24	2002-08-29	News	2	8000	Heavy rain	1	417.35	17605
2045	std	0	South Korea	North Korea	128.621	35.4377	2002-08-31	2002-09-03	News	138	70000	Heavy rain	1	71.1	24669
2046	std	0	Russia	0	133.885	45.9346	2002-08-28	2002-09-06	News	0	0	Heavy rain	1	413.49	3355
2049	std	0	India	0	73.2201	21.5391	2002-09-03	2002-09-06	News	22	5000	Heavy rain	1	114.39	17812
2052	std	0	France	0	4.44759	44.0345	2002-09-08	2002-09-12	News	23	2500	Heavy rain	1	146.01	44830
2056	std	0	USA	0	-96.0297	29.6511	2002-09-06	2002-09-19	News	0	0	Heavy rain	1	806.01	4133
2059	std	0	Vietnam	0	105.175	18.5778	2002-09-20	2002-09-30	News	76	200000	Heavy rain	2	6721.21	474218
2060	std	0	Albania	0	19.7738	41.3975	2002-09-21	2002-10-08	News	1	9700	Heavy rain	1	349.95	43355
2061	std	0	Thailand	0	100.951	14.9743	2002-09-17	2002-12-02	News	1	3000	Heavy rain	1	35053.7	1997756
2063	std	0	USA	0	-90.0119	29.8703	2002-09-26	2002-09-29	News	1	2500	Tropical Storm, Surge	1	1822.29	2232
2064	std	0	USA	0	-83.9795	22.3815	2002-09-29	2002-10-07	News	8	317000	Heavy rain	1	1797.71	33320
2066	otsu	0	USA	0	-89.9243	34.6073	2002-10-10	2002-10-12	News	3	0	Heavy rain	1	1992.91	47319
2070	std	0	Argentina	Chile	-60.1011	-31.072	2002-10-12	2002-11-02	News	7	6000	Heavy rain	1	23827.4	21020
2073	std	0	Uruguay	0	-57.9616	-31.6196	2002-10-12	2002-11-11	News	0	2000	Heavy rain	1	18640	28498
2075	std	0	USA	0	-150.891	60.3357	2002-10-24	2002-10-28	News	0	0	Heavy rain	2	1271.17	19512
2076	std	0	USA	0	-96.0297	29.6511	2002-10-23	2002-11-13	News	1	75	Heavy rain	1	2691	13832
2077	std	0	Vietnam	0	108.878	14.2062	2002-10-26	2002-10-29	News	2	0	Heavy rain	1	5859.86	472890
2079	otsu	0	China	0	113.385	24.2694	2002-10-28	2002-11-02	News	0	50000	Heavy rain	1	1849.23	1821249
2090	std	0	New Zealand	0	172.869	-43.6673	2002-11-19	2002-11-21	News	0	0	Heavy rain	1	33.31	334
2097	std	0	Morocco	0	-7.09879	33.1091	2002-11-24	2002-11-29	News	63	0	Heavy rain	2	286.74	15118
2099	std	0	Italy	0	8.64237	45.8293	2002-11-22	2002-12-03	News	0	10000	Heavy rain	1	1540.23	183235
2103	std	0	France	0	4.14588	43.7308	2002-12-13	2002-12-14	News	2	0	Heavy rain	1	725.22	81840
2104	std	0	USA	0	-122.478	38.9397	2002-12-14	2002-12-24	News	6	0	Heavy rain	1	3539.45	281545
2106	otsu	0	Indonesia	0	100.517	0.977528	2002-12-15	2002-12-20	News	0	60000	Heavy rain	1	830.27	182714
2115	std	0	USA	0	-92.6206	31.8332	2003-01-01	2003-01-06	News	0	0	Heavy rain	1	13789.1	76208
2116	std	0	UK	0	-0.543564	51.2646	2003-01-01	2003-01-06	News	0	0	Heavy rain	1	4925.27	3742987
2117	otsu	0	Germany	Portugal	5.62514	49.2074	2003-01-01	2003-01-08	News	7	1500	Heavy rain	1	5305.1	1242069
2119	std	0	Malawi	Mozambique	38.8747	-14.7661	2003-01-01	2003-02-17	News	23	400000	Heavy rain	1	2012.48	58845
2120	std	0	Bolivia	0	-64.945	-16.4857	2003-01-03	2003-01-08	News	1	6000	Heavy rain	1	406.16	89
2127	std	0	Indonesia	0	113.005	-2.42875	2003-01-14	2003-02-06	News	0	30000	Heavy rain	2	126.29	2623
2130	std	0	Argentina	0	-60.9786	-29.4558	2003-01-13	2003-01-31	News	0	0	Heavy rain	1	8334.06	8331
2134	otsu	0	Malaysia	0	102.894	2.4676	2003-01-20	2003-02-10	News	1	1500	Heavy rain	1	1716.08	469893
2136	std	0	UK	0	-2.49865	57.049	2003-01-22	2003-01-23	News	0	0	Heavy rain	1	649.37	242209
2137	std	0	Australia	0	139.397	-17.9301	2003-01-22	2003-03-06	News	0	0	Heavy rain	1	5354.18	61
2138	otsu	0	Peru	0	-70.4323	-13.3744	2003-01-23	2003-02-10	News	7	12000	Heavy rain	1	19134.1	13679
2140	std	0	Italy	0	15.9205	41.3473	2003-01-25	2003-01-27	News	1	1000	Heavy rain	1	1013.22	247185
2143	std	0	Australia	0	118.212	-22.4964	2003-01-26	2003-02-04	News	0	0	Heavy rain	1	3390.53	17
2145	std	0	Peru	0	-69.31	-15.8735	2003-01-28	2003-02-10	News	6	34000	Heavy rain	1	3543.55	10467
2148	std	0	Indonesia	0	107.641	-7.04676	2003-01-30	2003-02-09	News	0	0	Heavy rain	1	656.64	153673
2152	std	0	Australia	0	150.373	-23.7719	2003-02-05	2003-02-12	News	1	20	Heavy rain	1	227.4	36
2154	std	0	Australia	0	146.722	-22.2781	2003-02-11	2003-02-14	News	0	0	Heavy rain	1	391.69	6
2158	otsu	0	Indonesia	0	107.604	-6.97319	2003-02-16	2003-02-17	News	0	4300	Heavy rain	1	478.05	292333
2160	std	0	Pakistan	Afghanistan	68.0677	27.5247	2003-02-16	2003-02-22	News	20	3000	Heavy rain	1	7368.21	21942
2161	std	0	Zambia	Angola	21.7005	-12.1764	2003-01-15	2003-07-01	News	7	20000	Heavy rain	2	24966.6	63308
2162	otsu	0	Angola	0	18.0146	-10.4392	2003-02-06	2003-02-20	News	0	0	Heavy rain	1	13291.5	31684
2167	std	0	USA	0	-90.0652	31.4633	2003-02-22	2003-03-17	News	1	0	Heavy rain	1	13490.9	79224
2169	std	0	Spain	France	-1.16593	43.3022	2003-02-05	2003-02-13	News	1	0	Heavy rain	1	1002.68	127182
2170	std	0	Australia	0	138.398	-29.2128	2003-02-22	2003-03-24	News	0	0	Heavy rain	1	15589.8	1425
2172	std	0	Greece	0	22.2237	39.6089	2003-01-27	2003-02-07	News	0	0	Heavy rain	1	1157.06	52406
2173	std	0	Brazil	0	-50.4819	-11.8781	2003-01-11	2003-04-22	News	0	0	Heavy rain	1	4622.59	8415
2174	std	0	Turkey	Greece	26.7148	41.591	2003-01-17	2003-03-03	News	0	0	Heavy rain	1	2621.4	302595
2175	std	0	Turkey	0	28.312	38.0893	2003-02-04	2003-03-12	News	0	0	Heavy rain	1	2158.44	393344
2176	std	0	Australia	0	124.223	-17.9705	2003-03-02	2003-03-11	News	0	0	Heavy rain	1	1737.73	19
2177	std	0	USA	0	-88.0179	37.411	2003-02-26	2003-03-07	News	0	0	Heavy rain	1	1959.52	5485
2178	std	0	Mozambique	Zimbawe	32.6645	-21.3783	2003-03-05	2003-03-16	News	8	8300	Heavy rain	1	797.9	6364
2179	std	0	Spain	0	-1.03538	41.8344	2003-02-27	2003-03-10	News	0	0	Heavy rain	1	360.38	54453
2180	std	0	Australia	0	133.126	-14.0855	2003-03-07	2003-03-17	News	0	0	Heavy rain	1	6202.65	119
2181	std	0	Zambia	0	27.69	-16.0663	2003-03-11	2003-03-15	News	0	6400	Heavy rain	2	416.15	972
2182	std	0	USA	0	-104.729	47.7159	2003-03-17	2003-03-21	News	0	0	Snowmelt, Ice, Rain	1	5796.99	7380
2183	std	0	USA	0	-81.7756	35.1516	2003-03-19	2003-03-31	News	0	0	Heavy rain	1	4409.32	56183
2187	otsu	0	Ukraine	0	33.3194	48.241	2003-03-22	2003-04-04	News	0	130	Snowmelt, Ice, Rain	1	9872.18	187122
2191	std	0	Russia	0	133.058	44.3837	2003-03-25	2003-04-11	News	0	0	Snowmelt, Ice, Rain	1	3479.71	21025
2193	otsu	0	Belarus	Ukraine	25.203	52.5773	2003-03-22	2003-05-05	News	0	0	Snowmelt, Ice, Rain	1	30441.1	743431
2194	std	0	Mozambique	0	34.9058	-19.7644	2003-03-26	2003-03-28	News	2	15000	Heavy rain	1	178.8	3013
2198	std	0	Canada	0	-63.9857	45.105	2003-03-31	2003-04-03	News	2	170	Snowmelt, Ice, Rain	1	89.13	1556
2206	std	0	Azerbaijan	0	47.1927	40.9417	2003-04-16	2003-06-04	News	0	0	Heavy rain	1	2122.38	63027
2208	std	0	Russia	0	64.7393	55.4536	2003-04-16	2003-05-28	News	0	0	Snowmelt, Ice, Rain	1	98547.6	1014245
2209	std	0	Russia	0	35.7082	52.5531	2003-04-15	2003-05-18	News	0	600	Snowmelt, Ice, Rain	1	22409	806011
2214	std	0	Russia	0	79.3162	57.8205	2003-04-23	2003-05-13	News	0	500	Snowmelt, Ice, Rain	1	54899.7	260971
2216	std	0	Argentina	0	-60.4971	-31.5791	2003-04-28	2003-05-10	News	24	161500	Heavy rain	2	23062.3	29824
2220	std	0	Papua New Guinea	0	143.696	-4.40214	2003-04-14	2003-05-04	News	0	0	Heavy rain	1	545.82	22806
2221	otsu	0	Russia	0	42.3946	63.5313	2003-05-01	2003-05-16	News	0	1600	Snowmelt, Ice, Rain	1	10025	76356
2222	otsu	0	Indonesia	0	103.544	-1.50382	2003-05-03	2003-05-06	News	0	2000	Heavy rain	1	247.91	44885
2224	std	0	Ethiopia	Somalia	44.6354	5.37112	2003-05-04	2003-05-20	News	106	111000	Heavy rain	1	202.14	30356
2225	otsu	0	USA	0	-85.4845	35.2142	2003-05-06	2003-05-14	News	3	2000	Heavy rain	2	18635	531867
2238	otsu	0	Russia	0	128.13	62.8787	2003-05-27	2003-06-20	News	0	400	Snowmelt, Ice, Rain	1	24070.3	8780
2248	std	0	Bangladesh	India	90.8538	26.1706	2003-06-11	2003-10-10	News	600	9500000	Heavy rain	2	79213.4	16822143
2253	otsu	0	USA	0	-82.3633	38.3574	2003-06-13	2003-06-19	News	7	1500	Heavy rain	1	3175.64	430158
2257	std	0	Bangladesh	0	91.9327	21.9239	2003-06-19	2003-07-03	News	55	20000	Heavy rain	1	1262.34	231399
2261	std	0	China	0	118.401	28.831	2003-06-23	2003-07-28	News	430	1500000	Heavy rain	1	14553.6	1968365
2264	std	0	Philippines	0	124.377	7.04391	2003-06-25	2003-06-26	News	2	10000	Heavy rain	1	457.28	179086
2269	std	0	China	0	115.718	32.5166	2003-07-01	2003-08-07	News	18	1600000	Heavy rain	2	7778.61	1053765
2273	std	0	USA	0	-85.9761	39.7887	2003-07-05	2003-07-21	News	3	1200	Heavy rain	2	765.06	50616
2276	std	0	Burma	0	95.5035	20.5747	2003-07-02	2003-09-01	News	0	0	Heavy rain	1	10302.5	1112750
2279	std	0	Pakistan	India	72.2101	28.7319	2003-07-15	2003-09-01	News	285	900000	Heavy rain	1	37741.1	3564964
2284	std	0	Philippines	0	121.267	16.5019	2003-07-19	2003-07-23	News	22	20000	Tropical Storm, Surge	1	437.9	174725
2296	std	0	China	0	124.702	47.944	2003-07-27	2003-10-10	News	0	1000	Heavy rain	1	13836.3	567968
2303	std	0	Chad	0	20.2497	10.9965	2003-08-03	2003-11-02	News	0	0	Heavy rain	1	6827.49	366045
2311	std	0	Nigeria	0	4.73527	12.3948	2003-08-05	2003-10-12	News	7	10000	Heavy rain	1	4004.05	108235
2314	std	0	Nigeria	0	10.0128	12.6342	2003-08-05	2003-10-12	News	7	10000	Heavy rain	1	726.74	59376
2316	std	0	Senegal	Mauritania	-12.9402	15.9392	2003-08-09	2003-11-05	News	10	5300	Heavy rain	1	3737.17	72374
2320	std	0	Mali	0	-3.10202	14.2117	2003-08-10	2003-10-19	News	31	10000	Heavy rain	1	7280.71	176517
2330	std	0	Australia	0	147.481	-41.6933	2003-08-24	2003-08-27	News	0	0	Heavy rain	2	59.17	485
2332	std	0	China	0	107.985	35.6812	2003-08-24	2003-11-12	News	123	670000	Heavy rain	2	16906.4	2972338
2336	otsu	0	Russia	0	44.3698	44.7002	2003-08-27	2003-08-29	News	0	200	Heavy rain	1	784.99	11129
2337	otsu	0	China	0	103.018	30.0316	2003-08-26	2003-08-30	News	17	0	Heavy rain	1	6383.01	11262984
2338	std	0	India	0	85.8936	20.6258	2003-08-27	2003-10-20	News	67	3000000	Heavy rain	1	8236.7	3757250
2342	std	0	USA	0	-86.6173	39.7344	2003-09-01	2003-09-09	News	1	500	Heavy rain	2	206.01	2338
2345	std	0	Nigeria	0	7.48686	10.5143	2003-09-05	2003-10-28	News	16	210000	Heavy rain	1	3316.53	149967
2347	std	0	Thailand	0	101.593	17.3728	2003-09-12	2003-10-12	News	7	10000	Heavy rain	1	10645.2	385965
2348	std	0	South Korea	0	128.019	35.2349	2003-09-12	2003-09-15	News	127	9000	Tropical Storm, Surge	1	125.29	65629
2356	std	0	Mexico	0	-110.096	23.6058	2003-09-22	2003-10-01	News	2	6000	Tropical Storm, Surge	1	3670.86	33422
2359	std	0	France	0	4.15721	43.7231	2003-09-22	2003-09-23	News	1	30	Heavy rain	1	213.19	38057
2361	std	0	Nigeria	0	11.9235	8.87752	2003-09-22	2003-10-10	News	28	1000	Heavy rain	1	2171.72	197099
2366	std	0	USA	0	-99.2055	27.6304	2003-10-12	2003-10-24	News	0	50	Heavy rain	2	2002.68	8460
2368	std	0	Vietnam	0	108.846	14.7675	2003-10-15	2003-10-22	News	52	40000	Heavy rain	1	1506.95	54347
2370	std	0	Thailand	0	99.79	12.5592	2003-10-17	2003-11-04	News	3	3000	Heavy rain	2	10395.9	590850
2372	std	0	Brazil	0	-53.2687	-29.9288	2003-10-27	2003-10-31	News	0	0	Heavy rain	1	721.56	1725
2380	std	0	Haiti	0	-70.9826	19.4794	2003-11-10	2003-11-26	News	12	48000	Heavy rain	1	224.79	61087
2381	std	0	Argentina	0	-61.686	-32.7122	2003-11-11	2003-11-13	News	12	900	Heavy rain	1	6032.4	3667
2386	std	0	Spain	0	-6.24949	37.0912	2003-11-01	2004-01-18	News	3	0	Heavy rain	1	1247.57	35396
2395	std	0	France	0	4.94085	44.8217	2003-12-01	2003-12-10	News	9	27000	Heavy rain	2	2262.87	375577
2403	otsu	0	Indonesia	0	102.902	-1.04163	2003-12-10	2004-01-23	News	148	350000	Heavy rain	2	2883.13	520078
2407	std	0	Philippines	0	125.766	8.88198	2003-12-19	2004-01-07	News	200	97500	Heavy rain	1	943.65	368242
2412	std	0	USA	0	-85.3878	38.677	2004-01-04	2004-01-16	News	2	60	Heavy rain	1	3317.15	71989
2415	std	0	Iran		51.4395	29.4666	2004-01-10	2004-01-19	News	6	8000	Heavy rain	1	7017.61	23986
2417	std	0	Australia	0	141.148	-19.1711	2004-01-14	2004-02-25	News	0	3400	Heavy rain	2	12486	183
2423	std	0	Mozambique	0	32.8681	-25.399	2004-01-25	2004-02-06	News	2	0	Heavy rain	1	216.44	3561
2424	std	0	Australia	0	147.369	-41.4063	2004-01-29	2004-02-05	News	0	0	Heavy rain	2	126.34	379
2425	std	0	Angola	Namibia	15.2262	-16.048	2004-01-27	2004-03-01	News	0	0	Heavy rain	1	1116.13	22071
2426	std	0	Kazakhstan	0	63.7561	45.1809	2004-01-30	2004-03-02	News	0	2000	Dam	1	19004.5	31264
2428	std	0	UK	0	-3.78196	53.1328	2004-02-03	2004-02-07	News	0	0	Snowmelt, Ice, Rain	1	1464.85	851551
2430	std	0	Namibia	Zambia	21.4274	-14.5615	2004-02-01	2004-06-02	News	10	40000	Heavy rain	2	30425.1	119206
2431	std	0	Madagascar	0	44.6424	-17.4825	2004-01-08	2004-02-20	News	6	18000	Heavy rain	1	2680.35	66234
2432	std	0	Iraq	0	46.1627	30.8406	2004-01-16	2004-02-25	News	0	0	Heavy rain	1	15521.5	291359
2433	std	0	Turkey	0	27.9838	38.1568	2004-01-24	2004-02-14	News	0	0	Heavy rain	1	2304.48	384798
2434	std	0	Philippines	0	125.744	8.22929	2004-02-11	2004-02-25	News	7	20000	Heavy rain	1	620.75	306159
2437	std	0	Indonesia	0	108.144	-6.40958	2004-02-17	2004-02-25	News	0	4000	Heavy rain	1	586.91	115465
2440	std	0	Brazil	0	-50.4819	-11.8781	2004-02-11	2004-05-05	News	0	0	Heavy rain	1	23201.9	13400
2441	std	0	Australia	0	134.694	-16.9769	2004-02-18	2004-03-10	News	0	0	Heavy rain	1	9419.23	295
2442	std	0	Australia	0	124.624	-17.9451	2004-02-20	2004-03-07	News	0	0	Heavy rain	1	2465.56	107
2443	std	0	Bolivia	Brazil	-63.6763	-12.8522	2004-02-23	2004-04-01	News	0	0	Heavy rain	1	7025.9	7865
2444	std	0	Australia	0	116.975	-21.5563	2004-03-01	2004-03-09	News	0	0	Tropical Storm, Surge	2	1867.44	82
2448	std	0	Mozambique	0	34.5575	-19.1865	2004-03-05	2004-03-19	News	0	100	Heavy rain	1	396.16	3581
2455	std	0	USA	0	-95.9635	37.1562	2004-03-04	2004-03-08	News	0	30	Heavy rain	1	2051.62	4931
2458	std	0	Australia	0	143.299	-13.875	2004-03-19	2004-03-27	News	0	0	Tropical Storm, Surge	1	860.32	17
2460	std	0	Bosnia-Herzegovina	Croatia	18.0251	45.289	2004-03-23	2004-04-03	News	0	0	Heavy rain	1	1273.45	25746
2461	std	0	Australia	0	120.06	-21.4033	2004-03-27	2004-04-03	News	0	250	Tropical Storm, Surge	1	2147.65	15
2462	std	0	USA	Canada	-97.9994	48.162	2004-03-28	2004-04-11	News	0	1000	Snowmelt, Ice, Rain	2	25406.6	37908
2463	std	0	Russia	Belarus	34.4848	53.4739	2004-03-30	2004-05-05	News	0	1220	Snowmelt, Ice, Rain	1	54306.4	2442742
2469	std	0	Bosnia-Herzegovina	Croatia	17.7749	44.8661	2004-04-12	2004-05-02	News	0	1200	Heavy rain	1	1722.63	67447
2471	std	0	Russia	0	86.6102	51.9754	2004-04-14	2004-05-16	News	18	4800	Snowmelt, Ice, Rain	1	28026	317137
2473	std	0	Bangladesh	India	91.6947	24.8942	2004-04-14	2004-05-03	News	12	50000	Heavy rain	1	10032.4	1543959
2476	std	0	USA	0	-93.2793	35.7496	2004-04-24	2004-05-02	News	4	0	Heavy rain	1	2500.25	4388
2480	std	0	Indonesia	0	116.828	-0.527894	2004-05-07	2004-05-11	News	0	10000	Heavy rain	1	1173.82	262483
2482	otsu	0	USA	0	-96.5166	30.8453	2004-05-13	2004-05-15	News	0	250	Heavy rain	1	323.25	3589
2491	std	0	USA	0	-121.357	37.9526	2004-06-03	2004-10-11	News	0	300	Dam	1	1596.32	6342
2495	std	0	Venezuela	0	-67.7953	7.22966	2004-06-08	2004-10-01	News	0	2500	Heavy rain	1	9083.98	12127
2498	otsu	0	USA	0	-88.7195	43.4752	2004-06-10	2004-06-21	News	0	500	Heavy rain	2	764.83	9032
2507	std	0	India	Bangladesh	85.8918	25.4989	2004-06-20	2004-10-07	News	3000	40000000	Heavy rain	2	75030.8	19855086
2510	std	0	Nicaragua	0	-84.8927	13.1133	2004-06-24	2004-07-20	News	25	18000	Heavy rain	1	600.89	9426
2514	otsu	0	Philippines	0	124.576	7.37715	2004-06-28	2004-06-30	News	5	1200	Heavy rain	1	493.68	163487
2515	std	0	China	0	104.834	28.8637	2004-06-28	2004-06-30	News	15	0	Heavy rain	1	275.78	37710
2516	otsu	0	Philippines	Taiwan	121.41	17.5033	2004-06-29	2004-07-13	News	54	385000	Tropical Storm, Surge	2	4770.37	1944264
2519	std	0	Nepal	Bhutan	86.2525	27.0864	2004-07-05	2004-08-11	News	185	100000	Heavy rain	1	18241.8	4343195
2522	otsu	0	China	0	110.433	24.0014	2004-07-14	2004-07-27	News	24	82000	Heavy rain	1	8118.58	4976218
2527	std	0	China	0	110.829	27.8758	2004-07-17	2004-07-30	News	2	135000	Heavy rain	2	1909.6	481448
2539	otsu	0	Philippines	0	124.577	7.02107	2004-07-31	2004-08-13	News	0	80000	Heavy rain	1	1283.48	555250
2543	std	0	Thailand	0	103.073	15.3973	2004-08-06	2004-10-03	News	11	60000	Heavy rain	2	19087.3	815647
2554	std	0	Philippines	Taiwan	120.754	15.5474	2004-08-24	2004-09-12	News	67	1058849	Tropical Storm, Surge	2	1069.4	437771
2555	std	0	Vietnam	Cambodia	105.824	10.3179	2004-08-24	2004-10-21	News	34	30000	Heavy rain	1	35937.3	2862997
2565	std	0	USA	0	-92.8998	43.3726	2004-09-15	2004-09-19	News	1	0	Heavy rain	1	348.64	13069
2566	otsu	0	Haiti	0	-81.9664	28.8006	2004-09-15	2004-10-01	News	3006	280000	Tropical Storm, Surge	1	7588.46	174805
2570	std	0	India	Bangladesh	89.4002	24.6862	2004-10-07	2004-10-18	News	210	100000	Heavy rain	1	36804.2	11965543
2576	otsu	0	Togo	0	1.22378	6.1482	2004-10-07	2004-11-04	News	0	300	Heavy rain	2	597.23	93175
2584	std	0	USA	0	-97.4818	29.9969	2004-11-15	2004-11-29	News	3	600	Heavy rain	1	1423.95	7511
2586	std	0	Paraguay	Argentina	-57.5059	-26.5435	2004-11-07	2004-12-15	News	0	0	Heavy rain	1	14528.1	25013
2587	std	0	Philippines	0	123.387	13.4313	2004-11-19	2004-11-29	News	61	35000	Tropical Storm, Surge	1	806.98	366323
2588	otsu	0	Venezuela	0	-72.3649	8.91445	2004-11-20	2004-11-27	News	0	0	Heavy rain	1	3081.33	113525
2589	otsu	0	Philippines	0	121.706	16.3889	2004-11-23	2004-11-28	News	26	8000	Tropical Storm, Surge	1	1515.14	738519
2592	otsu	0	Philippines	0	121.243	15.1788	2004-11-29	2004-12-22	News	939	432000	Heavy rain	1	2774.94	1278853
2596	std	0	Argentina	0	-60.666	-27.1808	2004-12-06	2004-12-10	News	0	5000	Heavy rain	1	1684.08	127
2597	std	0	USA	0	-89.5703	33.963	2004-12-07	2004-12-20	News	0	0	Heavy rain	1	13595.9	68282
2598	std	0	Australia	0	150.13	-29.1368	2004-12-08	2004-12-22	News	3	150	Heavy rain	1	3547.81	315
2599	std	0	Iran	0	51.7011	28.4261	2004-12-09	2005-01-01	News	54	4000	Heavy rain	1	5626.23	37918
2600	std	0	Malaysia	Thailand	101.592	6.27156	2004-12-10	2004-12-18	News	15	20000	Heavy rain	2	570.59	117937
2601	std	0	Sri Lanka	0	81.3147	7.93818	2004-12-11	2004-12-23	News	6	200000	Heavy rain	1	667.59	130911
2606	std	0	USA	0	-85.3524	38.2106	2005-01-05	2005-02-01	News	3	4000	Heavy rain	2	18415.1	260784
2612	otsu	0	Indonesia	0	104.432	-3.90354	2005-01-11	2005-02-10	News	9	0	Heavy rain	1	3974.07	479163
2613	std	0	Guyana	0	-58.0383	6.60784	2005-01-15	2005-02-25	News	31	375000	Heavy rain	2	286.27	35154
2620	otsu	0	Angola	0	17.1667	-10.734	2005-01-27	2005-03-28	News	0	10000	Heavy rain	1	4653.06	15981
2625	otsu	0	Colombia	Venezuela	-72.9646	7.58834	2005-02-11	2005-02-26	News	95	70000	Heavy rain	1	12003.3	742367
2626	std	0	Greece	Bulgaria	26.4187	41.4282	2005-02-17	2005-03-24	News	0	300	Heavy rain	2	1529.01	97450
2627	otsu	0	Indonesia	0	107.603	-6.95896	2005-02-19	2005-02-25	News	0	50000	Heavy rain	1	1716.03	972246
2629	std	0	Kazakhstan	Uzbekistan	66.9818	43.5954	2005-02-24	2005-03-23	News	0	30000	Dam	1	16436.3	118074
2632	std	0	Afghanistan	0	61.8546	30.7384	2005-03-05	2005-04-05	News	26	5000	Heavy rain	1	3959.43	19636
2633	std	0	Madagascar	0	48.2834	-17.7598	2005-03-02	2005-03-15	News	25	8300	Heavy rain	1	1492.03	111393
2634	otsu	0	Algeria	0	3.95344	24.212	2005-03-06	2005-03-09	News	3	0	Heavy rain	1	2529.83	139
2637	std	0	Iraq	0	46.294	32.9589	2005-03-13	2005-03-25	News	0	0	Heavy rain	1	11232.2	159353
2638	std	0	Zambia	0	31.1146	-10.5871	2005-03-01	2005-04-01	News	0	300	Heavy rain	1	5371.33	60699
2640	std	0	Poland	Romania	21.6586	50.5111	2005-03-17	2005-04-08	News	4	1000	Snowmelt, Ice, Rain	1	14578.6	665499
2641	otsu	0	Pakistan	0	68.3724	29.5182	2005-03-20	2005-03-24	News	20	3500	Heavy rain	1	11329.7	2145116
2648	std	0	Romania	Serbia	21.2129	45.6965	2005-04-18	2005-06-04	News	4	7000	Heavy rain	2	1864.06	45129
2649	std	0	Ethiopia	Somalia	43.2861	6.2723	2005-04-23	2005-06-14	News	177	260000	Heavy rain	2	1465.79	131351
2650	std	0	Georgia	Russia	41.5522	42.6487	2005-04-25	2005-05-30	News	0	6000	Heavy rain	1	62309.7	621222
2657	std	0	Bangladesh	0	91.6424	24.598	2005-05-25	2005-05-28	News	13	50000	Heavy rain	1	5407.34	1033999
2668	otsu	0	China	0	129.266	44.3196	2005-06-10	2005-06-12	News	117	400	Heavy rain	2	19073.4	2034586
2669	otsu	0	Taiwan	0	120.345	22.8027	2005-06-11	2005-06-17	News	16	2700	Heavy rain	2	27.07	8180
2675	std	0	Pakistan	Afghanistan	71.5076	34.272	2005-06-21	2005-08-05	News	5	50000	Snowmelt, Ice, Rain	2	3631.2	721915
2676	std	0	Bangladesh	0	89.1145	25.9614	2005-06-23	2005-06-30	News	5	70000	Heavy rain	1	2491.27	443415
2680	std	0	India	0	73.0739	21.433	2005-06-28	2005-07-15	News	202	500000	Heavy rain	2	947.04	27263
2683	std	0	Australia	0	153.289	-28.5195	2005-06-30	2005-07-03	News	3	3000	Heavy rain	1	148.25	1678
2684	otsu	0	China	0	103.519	30.6766	2005-06-28	2005-07-19	News	65	428000	Heavy rain	1	16098.6	25026202
2685	otsu	0	North Korea	0	126.499	39.7282	2005-06-30	2005-07-02	News	88	16000	Heavy rain	1	75.16	63088
2686	std	0	India	0	80.1999	24.1288	2005-07-02	2005-07-15	News	62	49000	Heavy rain	1	964.62	131970
2688	std	0	China	0	125.501	44.5627	2005-07-01	2005-08-12	News	5	1500	Heavy rain	1	5007.34	134044
2689	std	0	Pakistan	India	73.5637	30.923	2005-07-05	2005-08-14	News	40	452000	Heavy rain	1	13900.7	2240223
2690	std	0	India	Bangladesh	87.0126	27.4363	2005-07-07	2005-07-27	News	40	3000000	Heavy rain	1	24136.4	5365759
2692	std	0	Romania	0	27.8629	45.7648	2005-07-12	2005-07-28	News	23	13000	Heavy rain	2	663.35	31334
2693	std	0	China	0	115.76	32.6055	2005-07-10	2005-07-18	News	0	0	Heavy rain	1	1479.71	143430
2694	std	0	Taiwan	China	120.856	28.1203	2005-07-16	2005-07-20	News	17	0	Tropical Storm, Surge	1	372.85	43200
2698	std	0	India	0	79.9654	16.9772	2005-07-23	2005-08-16	News	126	100000	Heavy rain	1	298.62	43496
2699	std	0	Philippines	0	122.905	10.4097	2005-07-27	2005-07-30	News	3	32782	Heavy rain	1	249.51	133629
2709	otsu	0	Thailand	0	99.3691	19.0685	2005-08-13	2005-09-26	News	11	119270	Heavy rain	2	59388.7	9186959
2711	std	0	China	0	123.07	41.8583	2005-08-13	2005-08-20	News	15	206000	Heavy rain	1	5224.82	196316
2717	std	0	Mexico	0	-98.6578	18.8116	2005-08-21	2005-08-30	News	30	10000	Heavy rain	1	1922.98	32456
2718	std	0	India	0	83.2115	25.886	2005-08-26	2005-08-30	News	21	0	Heavy rain	1	9537.03	1484596
2719	std	0	USA	0	-90.3201	30.191	2005-08-29	2005-09-19	News	1053	500000	Tropical Storm, Surge	2	3063.62	267155
2720	std	0	Australia	0	147.095	-41.5536	2005-08-30	2005-09-03	News	0	0	Heavy rain	1	135.01	1012
2721	otsu	0	Nigeria	0	10.9053	10.6656	2005-08-07	2005-09-16	News	3	7	Heavy rain	1	4615.87	438961
2722	std	0	Taiwan	China	118.554	28.5839	2005-09-01	2005-09-04	News	129	1840000	Tropical Storm, Surge	1	1925.06	127335
2724	std	0	France	0	4.18619	44.0571	2005-09-07	2005-09-09	News	0	3000	Heavy rain	1	209.23	31474
2725	std	0	Vietnam	Cambodia	105.735	10.7071	2005-09-08	2005-11-01	News	69	30000	Heavy rain	1	36396.4	2689505
2726	std	0	China	0	120.242	30.3681	2005-09-11	2005-09-13	News	16	1350000	Tropical Storm, Surge	1	2859.02	270778
2728	std	0	India	0	82.5389	21.1139	2005-09-14	2005-09-30	News	89	550000	Heavy rain	1	10524.9	2100902
2730	std	0	Philippines	0	120.983	15.301	2005-09-15	2005-09-27	News	16	8000	Heavy rain	1	587.57	254324
2731	std	0	India	0	79.3734	28.1973	2005-09-16	2005-10-05	News	23	0	Heavy rain	1	15836.3	2066400
2732	std	0	Vietnam	0	105.55	18.7601	2005-09-18	2005-09-24	News	8	8500	Tropical Storm, Surge	1	3613.48	242922
2733	std	0	Romania	Bulgaria	27.3833	44.5848	2005-09-21	2005-10-09	News	10	0	Heavy rain	1	680.55	43552
2734	std	0	India	0	73.4733	21.7139	2005-09-22	2005-10-11	News	15	0	Heavy rain	1	3548.35	767227
2735	std	0	USA	0	-92.9979	29.9816	2005-09-23	2005-10-01	News	0	0	Tropical Storm, Surge	1	5264.33	7966
2736	std	0	China	Vietnam	110.083	19.2402	2005-09-26	2005-10-06	News	104	470000	Tropical Storm, Surge	2	15552.6	857249
2737	std	0	Nepal	0	80.5476	29.2938	2005-09-25	2005-10-02	News	51	1600	Heavy rain	1	5916.47	1790981
2742	std	0	Mauritania	0	-11.9832	17.0464	2005-09-27	2005-10-07	News	0	3000	Heavy rain	2	191.44	443
2743	std	0	China	0	109.423	32.8686	2005-09-29	2005-10-06	News	2	24000	Heavy rain	1	302.03	102713
2744	std	0	El Salvador	Guatamala	-89.5951	13.9797	2005-10-01	2005-10-16	News	2000	250000	Tropical Storm, Surge	2	3929.5	56752
2746	std	0	China	0	109.084	34.5073	2005-10-03	2005-10-06	News	16	359000	Heavy rain	1	29.96	9649
2747	std	0	Bangladesh	0	88.977	25.6406	2005-10-03	2005-10-22	News	19	100000	Heavy rain	1	19555.4	6010585
2748	std	0	Vietnam	0	106.82	17.1257	2005-10-07	2005-10-11	News	17	10000	Heavy rain	1	3959.03	170087
2753	std	0	Jamaica	Haiti	-83.3284	22.4834	2005-10-19	2005-10-25	News	24	100000	Tropical Storm, Surge	1	6391.44	98152
2754	std	0	India	0	87.9347	21.9409	2005-10-21	2005-10-28	News	13	3000000	Heavy rain	1	2128.77	544049
2758	std	0	India	0	78.7317	11.7804	2005-10-23	2005-12-09	News	279	300000	Heavy rain	1	4035.46	976362
2760	std	0	Vietnam	0	108.217	15.6484	2005-11-02	2005-11-04	News	20	15000	Tropical Storm, Surge	1	2902.9	135273
2761	std	0	Colombia	0	-75.311	8.52116	2005-09-15	2005-12-16	News	95	100000	Heavy rain	1	6424.41	190649
2768	std	0	Thailand	Malaysia	100.124	7.20467	2005-11-23	2006-01-12	News	69	700000	Heavy rain	2	1035.64	161585
2773	otsu	0	Malawi	Mozambique	37.1689	-17.2365	2005-12-22	2006-02-07	News	23	50000	Heavy rain	2	1976.89	64042
2776	std	0	USA	0	-121.099	39.494	2005-12-31	2006-01-18	News	0	4000	Heavy rain	1	5657.41	69010
2779	std	0	Indonesia	0	108.215	-6.38134	2006-01-08	2006-01-12	News	0	6000	Heavy rain	1	894.81	111437
2780	std	0	Australia	0	116.936	-23.2603	2006-01-09	2006-01-31	News	0	1500	Tropical Storm, Surge	2	5903.29	964
2782	std	FL-2006-000009-GUY	Guyana	0	-58.6627	6.89182	2006-01-08	2006-02-14	News	20	5000	Heavy rain	1	516.47	8439
2784	std	0	Greece	Bulgaria	26.4726	41.5521	2006-01-02	2006-01-20	News	0	0	Snowmelt, Ice, Rain	1	1934.47	165338
2785	std	0	Philippines	0	121.817	17.0173	2006-01-26	2006-02-05	News	4	256641	Heavy rain	1	999.16	330556
2786	std	FL-2006-000010-BOL	Bolivia	0	-63.4256	-16.0334	2006-01-25	2006-04-17	News	23	100000	Heavy rain	1	31935.9	58787
2789	std	0	Indonesia	0	108.593	-6.8528	2006-01-26	2006-02-14	News	19	10000	Heavy rain	1	1345.59	297400
2798	std	0	Malaysia	Thailand	102.536	4.32621	2006-02-10	2006-02-18	News	3	7000	Heavy rain	1	586.6	82804
2802	std	FL-2006-000034-ECU	Ecuador	0	-79.9807	-2.23169	2006-02-16	2006-05-06	News	17	55000	Heavy rain	1	1471.95	38719
2803	std	0	China	0	87.2118	40.658	2006-02-16	2006-02-23	News	0	3000	Snowmelt, Ice, Rain	1	129.99	441
2815	std	0	Australia	0	114.989	-27.41	2006-03-03	2006-03-23	News	0	0	Tropical Storm, Surge	2	3109.59	441
2817	std	0	Greece	Turkey	25.5658	40.8959	2006-03-09	2006-03-25	News	0	0	Snowmelt, Ice, Rain	1	1211.46	28642
2818	std	0	USA	0	-86.4197	38.254	2006-03-12	2006-03-22	News	2	0	Heavy rain	1	1862.72	6390
2821	std	0	Australia	0	145.536	-17.9086	2006-03-20	2006-04-17	News	0	7000	Tropical Storm, Surge	2	12293.9	354
2823	std	FL-2006-000042-COL	Colombia	0	-75.5975	5.43477	2006-03-22	2006-06-02	News	130	60000	Heavy rain	1	9791.93	105141
2825	std	0	South Africa	0	24.8268	-27.4397	2006-03-26	2006-03-30	News	6	4160	Heavy rain	1	615.94	1929
2827	std	FL-2006-000045-HUN	Slovakia	Hungary	19.0844	48.6664	2006-03-28	2006-05-09	News	3	6020	Snowmelt, Ice, Rain	2	6741.81	627064
2829	std	0	USA	0	-96.8936	47.0035	2006-03-30	2006-04-25	News	1	0	Snowmelt, Ice, Rain	1	39527.2	48287
2832	std	FL-2006-000045-SRB	Serbia	Croatia	20.7493	45.2621	2006-04-04	2006-05-11	News	0	1500	Snowmelt, Ice, Rain	2	5286.88	223728
2834	std	0	USA	0	-120.675	37.6911	2006-04-04	2006-04-17	News	1	600	Heavy rain	1	2173.66	8352
2839	std	FL-2006-000045-ROM	Romania	Bulgaria	23.8669	44.4976	2006-04-07	2006-05-24	News	0	17000	Snowmelt, Ice, Rain	2	6111.92	149391
2841	std	0	Canada	0	-96.9531	49.8493	2006-04-11	2006-05-09	News	0	40	Snowmelt, Ice, Rain	1	13052.7	11525
2851	std	0	Russia	0	87.1438	50.7752	2006-04-21	2006-05-31	News	0	420	Snowmelt, Ice, Rain	1	41144.6	555571
2852	otsu	0	Canada	0	-82.0874	52.5336	2006-04-22	2006-05-31	News	0	2000	Snowmelt, Ice, Rain	2	9349.13	737
2859	std	0	Burma	0	94.9457	18.3679	2006-04-29	2006-05-05	News	21	800	Tropical Storm, Surge	1	2934.42	156341
2867	std	FL-2006-000062-THA	Thailand	0	100.149	18.181	2006-05-22	2006-06-11	News	79	2000	Heavy rain	2	5292.64	148803
2871	std	0	USA	0	-88.5858	36.9628	2006-05-25	2006-05-28	News	6	0	Heavy rain	1	146.95	1307
2879	std	FF-2006-000082-IND	India	Bangladesh	94.0245	26.5993	2006-05-31	2006-07-24	News	21	600000	Heavy rain	1	21448.2	4485860
2890	std	FF-2006-000069-IDN	Indonesia	0	120.107	-5.16666	2006-06-19	2006-06-23	News	291	7580	Heavy rain	1	278.11	59593
2894	std	FL-2006-000096-IND	India	Nepal	83.6713	25.6151	2006-06-24	2006-08-03	News	160	0	Heavy rain	1	10858.7	1788105
2896	otsu	0	Indonesia	0	115.49	-3.28577	2006-06-25	2006-06-29	News	26	3000	Heavy rain	1	1061.71	196285
2900	otsu	0	China	0	105.73	28.4708	2006-06-28	2006-07-08	News	50	10000	Heavy rain	1	8020.16	15304760
2911	otsu	0	India	0	71.3097	22.4114	2006-07-04	2006-07-07	News	24	8400	Heavy rain	1	6404.96	859713
2916	std	0	Pakistan	Afghanistan	69.9486	33.0562	2006-07-09	2006-07-13	News	23	50	Heavy rain	1	14.24	0
2919	otsu	0	China	0	128.901	47.7334	2006-07-11	2006-07-13	News	0	4000	Heavy rain	1	10664.9	1627917
2921	std	FL-2006-000098-PHI	Philippines	China	112.108	24.0035	2006-07-11	2006-07-19	News	629	2450000	Tropical Storm, Surge	2	3145.7	279592
2923	std	0	Russia	0	106.525	50.7912	2006-07-12	2006-07-14	News	0	6000	Heavy rain	1	1012.58	6837
2924	otsu	0	China	0	106.588	39.0355	2006-07-14	2006-07-17	News	1	1200	Heavy rain	1	2099.9	641293
2931	std	0	Pakistan	India	73.1998	34.6098	2006-07-24	2006-08-22	News	248	0	Heavy rain	1	5568.05	1431910
2935	std	FL-2006-000137-IND	India	Pakistan	73.8242	20.1943	2006-07-28	2006-09-12	News	457	140000	Heavy rain	2	28468.7	2075619
2940	std	FL-2006-000117-IND	India	0	81.5288	18.1046	2006-08-01	2006-09-10	News	185	2000000	Heavy rain	1	12437	2691152
2947	std	FL-2006-000120-BFA	Burkina Faso	Niger	-1.02134	14.4218	2006-08-03	2006-10-11	News	4	70000	Heavy rain	1	2768.18	46583
2948	std	FL-2006-000136-VNM	Vietnam	0	106.149	17.7642	2006-08-12	2006-09-02	News	42	50000	Heavy rain	1	4646.76	361507
2949	std	FL-2006-000130-KHM	Cambodia	Vietnam	104.675	11.0618	2006-08-10	2006-11-01	News	68	33000	Heavy rain	1	41258.5	3421776
2951	std	FL-2006-000125-THA	Thailand	0	100.017	18.7645	2006-08-20	2006-12-13	News	195	2000000	Heavy rain	2	24008.7	2041812
2952	std	FL-2006-000124-UGA	Uganda	0	34.2758	1.38446	2006-08-12	2006-08-21	News	3	1680	Heavy rain	1	972.31	58116
2954	std	FL-2006-000127-NPL	Nepal	0	81.306	28.6941	2006-08-26	2006-09-13	News	60	80000	Heavy rain	2	6391.6	975071
2955	std	0	Somalia	0	45.4444	3.10436	2006-08-24	2006-10-10	News	5	0	Heavy rain	1	134.91	28462
2956	std	0	India	0	81.5174	27.5853	2006-08-29	2006-09-04	News	42	50000	Heavy rain	1	4233.24	515933
2957	std	0	China	0	102.682	34.6955	2006-08-30	2006-08-31	News	15	0	Heavy rain	1	465.03	92709
2958	std	0	India	Pakistan	73.8842	32.8864	2006-08-31	2006-09-11	News	39	3000	Heavy rain	1	2674.75	907392
2959	std	0	USA	0	-77.8707	34.744	2006-09-02	2006-09-07	News	0	140	Tropical Storm, Surge	1	59.13	928
2961	std	FL-2006-000131-BGD	Bangladesh	0	89.2727	23.2295	2006-08-24	2006-09-20	News	0	0	Heavy rain	1	17824.1	3898327
2963	std	TC-2006-000138-MEX	Mexico	0	-107.039	24.4662	2006-09-16	2006-09-18	News	4	7000	Heavy rain	1	924.4	3004
2995	std	0	Afghanistan	0	66.1253	32.7423	2006-11-19	2006-11-21	News	50	0	Heavy rain	1	38.4	643
3002	std	TC-2006-000175-PHL	Philippines	Vietnam	106.736	10.3297	2006-11-30	2006-12-08	News	526	82915	Heavy rain	1	14555.9	1193374
3004	std	FL-2006-000191-LKA	Sri Lanka	0	81.6623	6.84455	2006-12-17	2006-12-20	News	0	40000	Heavy rain	1	17.45	49817
3007	std	0	Peru	0	-75.9903	-9.18487	2006-12-26	2007-02-02	News	6	46000	Heavy rain	1	2200.2	6995
3014	std	0	Philippines	0	125.217	7.71183	2007-01-10	2007-01-24	News	6	24508	Heavy rain	1	945.34	433713
3016	std	FF-2007-000008-LKA	Sri Lanka	0	80.9466	6.70613	2007-01-12	2007-01-16	News	18	61281	Heavy rain	1	86.09	6458
3019	std	FL-2007-000012-BOL	Bolivia	0	-61.9602	-16.9738	2007-01-10	2007-05-01	News	41	62687	Heavy rain	1.5	31650.8	43268
3055	otsu	0	Afghanistan	0	69.6682	35.2702	2007-04-17	2007-04-18	News	6	0	Heavy rain	1	2464.15	148287
3058	std	0	China	0	99.8018	39.3328	2007-04-19	2007-04-21	News	0	5500	Dam	1	19.79	662
3061	otsu	0	Afghanistan	0	70.7315	37.0063	2007-04-23	2007-05-04	News	36	0	Heavy rain	1	1840.08	148756
3065	std	0	Indonesia	0	114.779	-0.860079	2007-05-01	2007-05-25	News	0	3000	Heavy rain	1	3178.93	89074
3067	std	FL-2007-000052-LKA	Sri Lanka	0	80.0822	6.49467	2007-05-02	2007-05-07	News	16	125000	Heavy rain	1	173.43	12124
3068	std	FL-2007-000053-MMR	Burma	0	96.1313	16.9089	2007-05-04	2007-05-09	News	5	0	Heavy rain	1	1917.42	76856
3070	std	0	USA	0	-95.2382	40.4342	2007-05-06	2007-05-18	News	2	1000	Heavy rain	1	8025.25	20646
3071	std	FL-2007-000057-URY	Uruguay	0	-55.8026	-32.7659	2007-05-04	2007-05-25	News	2	12000	Heavy rain	1.5	7307.52	11891
3073	std	0	Thailand	0	100.339	17.2115	2007-05-11	2007-05-21	News	0	1000	Heavy rain	1	4265.55	126609
3075	otsu	0	Russia	0	130.459	62.3364	2007-05-13	2007-06-13	News	0	7000	Snowmelt, Ice, Rain	1	34443.3	56562
3076	std	0	Russia	0	85.8394	56.9372	2007-05-11	2007-06-13	News	0	640	Snowmelt, Ice, Rain	1	51648.8	96127
3078	std	FL-2007-000076-KEN	Kenya	0	39.7621	-3.59393	2007-05-15	2007-06-14	News	5	8500	Heavy rain	1	401.6	47863
3079	std	0	China	0	105.414	26.8709	2007-05-20	2007-05-21	News	3	0	Heavy rain	1	199.16	69461
3080	std	FL-2007-000068-COL	Colombia	0	-75.4261	7.37836	2007-05-19	2007-06-27	News	14	3000	Heavy rain	1	2975.06	57575
3081	std	0	Indonesia	0	116.92	-0.1883	2007-05-15	2007-06-05	News	4	60000	Heavy rain	1	2506.96	60387
3083	std	0	USA	0	-98.6645	30.2433	2007-05-24	2007-05-29	News	6	100	Heavy rain	1	818.18	983
3084	std	FF-2007-000070-CHN	China	0	107.778	30.2821	2007-05-24	2007-05-26	News	43	112000	Heavy rain	1	106.71	7945
3085	std	0	Bulgaria	0	24.5016	42.5232	2007-05-22	2007-06-06	News	2	0	Heavy rain	1	519.65	21709
3089	std	0	Dominican Republic		-71.0538	19.5479	2007-05-30	2007-06-03	News	11	20000	Heavy rain	1	100.92	13819
3092	std	0	Canada	0	-125.033	54.1789	2007-06-06	2007-06-14	News	0	500	Snowmelt, Ice, Rain	1.5	1611.62	665
3094	std	FL-2007-000077-CHN	China	0	112.355	26.2928	2007-06-06	2007-08-17	News	600	3170000	Heavy rain	1.5	13768.7	2534434
3095	std	0	Australia	0	151.375	-32.8654	2007-06-08	2007-06-13	News	9	5000	Heavy rain	1.5	435.42	41177
3097	std	LS-2007-000080-BGD	Bangladesh		91.9535	22.3975	2007-06-11	2007-06-24	News	126	80000	Heavy rain	1	20493.4	4536692
3098	std	0	South Africa	0	18.5781	-33.3273	2007-06-07	2007-06-16	News	0	6000	Heavy rain	1.5	274.02	7141
3099	std	0	UK	0	-0.759207	52.5232	2007-06-15	2007-06-21	News	1	200	Heavy rain	1	10.23	8277
3100	std	FF-2007-000081-NPL	Nepal	0	85.8627	26.9485	2007-06-15	2007-06-18	News	0	400	Heavy rain	1	434.5	2921
3101	std	FF-2007-000082-PAK	Pakistan	0	72.2258	34.9758	2007-06-16	2007-06-20	News	22	500	Heavy rain	1	100.62	216
3103	std	0	Indonesia	0	123.096	0.617594	2007-06-16	2007-06-20	News	1	212	Heavy rain	1	783.27	58675
3104	std	FF-2007-000083-IND	India	0	94.0189	26.2558	2007-06-18	2007-06-26	News	15	200000	Heavy rain	1	19694.4	4055288
3107	std	TC-2007-000084-IND	India	0	78.1615	14.945	2007-06-22	2007-07-04	News	127	200000	Heavy rain	1	346.16	41036
3109	std	FF-2007-000091-AFG	Afghanistan	0	71.1407	35.2782	2007-06-24	2007-07-03	News	113	4000	Heavy rain	1	2085.67	274361
3110	std	0	UK	0	-0.913693	53.8814	2007-06-25	2007-07-03	News	6	30000	Heavy rain	1.5	10.61	14081
3112	std	TC-2007-000084-PAK	Pakistan	0	67.9025	25.2563	2007-06-26	2007-07-20	News	280	400000	Tropical Storm, Surge	1	6166.82	53344
3113	std	0	USA	0	-97.1657	32.8366	2007-06-26	2007-07-23	News	8	5000	Heavy rain	1.5	4836.03	13517
3114	std	0	Australia	0	146.856	-37.9361	2007-06-27	2007-07-04	News	1	300	Heavy rain	1.5	943.48	51921
3115	std	0	Iran	0	52.2019	33.7535	2007-06-27	2007-06-29	News	12	0	Heavy rain	1.5	3.4	0
3116	std	LS-2007-000098-PAK	Pakistan	0	71.8699	34.2749	2007-06-28	2007-07-22	News	130	2000	Heavy rain	1	1284.05	220839
3118	std	FL-2007-000096-IND	India	0	81.8601	20.0539	2007-06-30	2007-07-13	News	29	50000	Heavy rain	1	8237.57	2779386
3119	std	0	India	0	77.5237	21.0263	2007-07-01	2007-07-06	News	62	10000	Heavy rain	1	20.34	902
3120	std	0	India	0	72.2495	22.0231	2007-07-01	2007-07-13	News	225	63000	Heavy rain	1	2010.37	128587
3122	std	FL-2007-000096-IND	India	0	88.4871	22.6315	2007-07-03	2007-09-22	News	958	3000000	Heavy rain	1.5	53774.1	16486188
3123	std	FL-2007-000093-SDN	Sudan	0	33.7714	12.9072	2007-07-03	2007-10-08	News	150	200000	Heavy rain	1	8620.82	418485
3125	std	0	Burma	0	95.3174	18.5242	2007-07-06	2007-08-01	News	0	3000	Heavy rain	1	7735.3	588181
3127	std	0	New Zealand	0	173.929	-35.8054	2007-07-10	2007-07-13	News	0	600	Heavy rain	1.5	58.87	5398
3128	std	0	India	0	95.263	27.5773	2007-07-12	2007-10-10	News	96	11100000	Heavy rain	1	65675.3	21488636
3132	std	FL-2007-000112-CHN	China	0	88.212	43.0901	2007-07-14	2007-08-03	News	29	38500	Heavy rain	1	5683.99	43771
3134	std	0	China	0	100.164	24.0984	2007-07-18	2007-08-13	News	170	10000	Heavy rain	1	6746.66	844212
3136	std	0	Bangladesh		91.2336	23.9164	2007-07-21	2007-10-15	News	1071	5000000	Heavy rain	1	78785.5	27712991
3137	std	FL-2007-000111-GBR	UK	0	-2.10193	52.072	2007-07-21	2007-07-30	News	7	2100	Heavy rain	1.5	78.12	110241
3141	std	FL-2007-000106-IDN	Indonesia	0	120.198	-3.27954	2007-07-25	2007-08-02	News	15	2000	Heavy rain	1	562.6	26946
3143	std	FF-2007-000117-NPL	Nepal	0	84.0801	27.7772	2007-07-23	2007-10-02	News	185	86000	Heavy rain	1	24980.9	7110335
3144	std	0	South Africa	0	19.5753	-34.0906	2007-07-27	2007-08-02	News	0	38000	Heavy rain	1	189.94	13760
3145	std	0	Burkina Faso	0	-4.38647	11.4532	2007-07-28	2007-08-01	News	0	2000	Heavy rain	1	0	0
3146	std	FL-2007-000145-ETH	Ethiopia	0	34.5	8.33141	2007-07-29	2007-10-05	News	17	42000	Heavy rain	1	6193.71	271262
3149	std	FL-2007-000122-VNM	Vietnam	0	108.198	12.3429	2007-08-03	2007-08-17	News	74	10000	Heavy rain	1.5	169.61	7193
3150	std	0	India	0	86.1978	20.4525	2007-08-03	2007-08-27	News	15	20000	Heavy rain	1	8791.4	2648972
3151	std	FL-2007-000123-NGA	Nigeria	0	11.7484	10.2921	2007-08-04	2007-10-21	News	101	140000	Heavy rain	1	4610.12	765976
3153	std	FL-2007-000127-MRT	Mauritania	0	-11.3224	16.5463	2007-08-07	2007-09-05	News	2	15820	Heavy rain	1	0.24	0
3160	std	0	India	0	70.925	22.6824	2007-08-08	2007-08-15	News	12	0	Heavy rain	1	2705.01	23679
3161	std	0	China	0	118.719	36.3693	2007-08-09	2007-08-12	News	26	70000	Heavy rain	1	2624.06	89691
3162	std	0	Pakistan	0	68.8257	26.0192	2007-08-10	2007-08-13	News	35	0	Heavy rain	1	1869.41	19033
3164	std	0	India	0	76.5268	31.2388	2007-08-12	2007-08-17	News	76	15000	Heavy rain	1	7275.37	1188060
3165	std	0	Pakistan	0	74.3382	35.9513	2007-08-12	2007-08-14	News	22	0	Heavy rain	1	189.38	3826
3166	std	FL-2007-000132-BFA	Ghana		0.612005	13.0377	2007-07-26	2007-10-10	News	153	540000	Heavy rain	1.5	7621.96	325408
3167	std	0	Chad	0	15.1096	9.6446	2007-08-09	2007-08-15	News	3	3000	Heavy rain	1	113.47	6635
3168	std	0	Cambodia	0	105.882	13.2799	2007-08-10	2007-08-24	News	2	19000	Heavy rain	1.5	3137.62	178764
3169	std	FL-2007-000146-MMR	Burma	0	95.1728	16.9624	2007-08-14	2007-10-04	News	2	40000	Heavy rain	1	13327	1326841
3170	std	FL-2007-000161-UGA	Uganda		34.2759	0.88127	2007-08-15	2007-10-31	News	52	520000	Heavy rain	1.5	2972.41	201141
3171	std	0	USA	0	-94.6379	36.8622	2007-08-16	2007-08-27	News	26	2800	Heavy rain	1.5	2915.02	59538
3179	std	FL-2007-000151-TCD	Chad	0	19.0494	11.5438	2007-08-25	2007-10-01	News	12	170000	Heavy rain	1	2089.49	52912
3180	std	FL-2007-000131-SEN	Senegal		-13.9678	15.4745	2007-08-31	2007-09-20	News	1	0	Heavy rain	1	528.09	19953
3183	std	0	Somalia	0	45.4269	2.97811	2007-09-01	2007-10-04	News	4	8000	Heavy rain	1	42.68	6879
3184	std	0	Nicaragua		-98.4943	21.8462	2007-09-04	2007-09-12	News	102	90000	Tropical Storm, Surge	1	2066.84	17266
3188	std	FL-2007-000199-THA	Thailand	0	102.48	16.8198	2007-09-05	2007-11-10	News	10	17000	Heavy rain	1	21787.7	999066
3191	std	0	India	0	79.878	15.7067	2007-09-16	2007-10-07	News	94	20000	Heavy rain	1	3648.08	139437
3193	std	0	Slovenia	0	14.0326	46.2575	2007-09-18	2007-09-20	News	6	0	Heavy rain	1	180.72	18231
3195	std	0	India	0	86.4033	20.9096	2007-09-22	2007-10-08	News	80	400000	Heavy rain	1	9168.95	3168098
3197	std	0	Algeria	0	5.78849	34.9455	2007-09-21	2007-09-24	News	18	0	Heavy rain	1	597.9	18069
3198	std	0	Brazil	0	-52.6714	-30.2516	2007-09-24	2007-10-02	News	4	4000	Heavy rain	1	4410.14	17791
3199	std	0	Mexico	0	-97.8506	20.9316	2007-09-28	2007-10-01	News	5	33000	Tropical Storm, Surge	1	775.84	9284
3205	std	FL-2007-000189-NIC	Costa Rica		-85.4379	10.984	2007-10-12	2007-10-26	News	37	10000	Heavy rain	1	2562.76	36972
3208	std	0	India	0	93.9705	24.7214	2007-10-17	2007-10-24	News	2	30000	Heavy rain	1.5	12601.9	4006102
3210	std	0	Vietnam	0	105.514	11.0109	2007-10-20	2007-11-16	News	3	280000	Heavy rain	1	28630.9	2013460
3212	std	0	Colombia	0	-74.9063	7.89355	2007-10-01	2007-12-10	News	90	266000	Heavy rain	1	6429.65	178312
3214	std	FL-2007-000197-COD	Democratic Republic of Congo		15.3815	-4.36763	2007-10-25	2007-10-31	News	30	3500	Heavy rain	1	27.43	5505
3216	std	0	Philippines	0	123.381	13.3575	2007-10-27	2007-11-02	News	20	0	Heavy rain	1	369.1	121693
3217	std	FL-2007-000203-IND	India	0	79.7002	12.725	2007-10-27	2007-11-01	News	29	50000	Heavy rain	1	2694.16	313759
3218	std	TC-2007-000198-DOM	Dominican Republic		-70.3776	18.8777	2007-10-28	2007-11-10	News	142	94000	Tropical Storm, Surge	1	2421.73	76670
3219	std	FL-2007-000201-VNM	Vietnam	0	107.36	16.3208	2007-10-28	2007-11-09	News	70	94000	Heavy rain	1	5449.02	437707
3220	std	FL-2007-000200-MEX	Mexico	0	-92.413	17.6693	2007-10-28	2007-12-01	News	19	800000	Heavy rain	1.5	4259.02	63358
3221	std	0	Algeria	0	3.24194	34.8234	2007-10-30	2007-11-02	News	4	0	Heavy rain	1	1071.08	23070
3226	std	TC-2007-000208-BGD	Bangladesh	0	90.1508	22.6104	2007-11-15	2007-12-01	News	3447	3000000	Tropical Storm, Surge	1	13258.1	5454831
3235	std	FL-2007-000221-KEN	Kenya	0	40.2492	-2.15393	2007-11-21	2007-12-16	News	0	6000	Heavy rain	1	758.4	52613
3237	std	0	Australia	0	145.667	-26.9207	2007-12-01	2007-12-17	News	0	0	Heavy rain	1	403.95	2
3239	std	ST-2007-000224-DOM	Dominican Republic		-71.03	18.9316	2007-12-11	2007-12-17	News	36	62000	Tropical Storm, Surge	1	292.38	60725
3242	std	0	Mozambique	0	34.3565	-19.0634	2007-12-11	2008-01-03	News	3	10000	Heavy rain	1	1480.82	16062
3243	std	FL-2007-000228-LKA	Sri Lanka	0	81.3987	7.72192	2007-12-16	2008-01-01	News	0	250000	Heavy rain	1	407.29	88978
3246	std	FL-2007-000231-BOL	Bolivia	0	-65.3015	-17.6622	2007-12-15	2007-12-28	News	8	20000	Heavy rain	1	3918.99	8248
3247	std	0	Australia	0	148.213	-30.2933	2007-12-22	2007-12-31	News	0	0	Heavy rain	1	674.84	6432
3249	std	FL-2007-000230-IDN	Indonesia	0	111.333	-7.54216	2007-12-25	2008-01-03	News	153	50000	Heavy rain	1.5	52.62	19660
3251	std	0	Indonesia	0	106.828	-6.22483	2008-01-02	2008-01-06	News	0	1000	Heavy rain	1	1497.68	596168
3252	std	0	Australia	0	152.87	-28.4427	2008-01-03	2008-01-09	News	1	3000	Heavy rain	1.5	239.23	5534
3254	std	0	Sri Lanka	0	81.7574	6.90584	2008-01-07	2008-01-16	News	0	240000	Heavy rain	1	301.7	36471
3256	std	FL-2008-000010-BRA	Brazil	0	-47.8777	-24.4957	2008-01-12	2008-01-26	News	4	15000	Heavy rain	1	1664.31	1466
3257	std	FL-2008-000014-AUS	Australia	0	144.559	-20.3986	2008-01-14	2008-02-01	News	0	3200	Heavy rain	2	8951.42	441
3259	std	0	UK	0	-1.64786	52.9158	2008-01-15	2008-01-26	News	0	300	Heavy rain	2	2063.1	391804
3263	std	FL-2008-000018-ECU	Ecuador	0	-79.6578	-1.24728	2008-01-30	2008-05-01	News	51	265000	Heavy rain	2	7338.32	97411
3267	std	FL-2008-000031-PER	Peru	0	-73.0124	-10.1112	2008-02-04	2008-05-07	News	26	45000	Heavy rain	1	37315.6	115365
3268	std	0	USA	0	-86.8374	40.8507	2008-02-06	2008-02-12	News	0	150	Snowmelt, Ice, Rain	1.5	1458.09	31520
3270	std	0	Australia	0	149.539	-22.4647	2008-02-13	2008-02-26	News	2	1000	Heavy rain	2	803.4	340
3271	std	0	Indonesia	0	107.286	-6.26059	2008-02-14	2008-03-14	News	0	10000	Heavy rain	1	1058.46	316145
3272	std	FL-2008-000004-NAM	Zambia		23.7939	-14.9555	2008-02-09	2008-05-01	News	4	15000	Heavy rain	1	30683.3	233059
3273	std	FL-2008-000024-PHL	Philippines	0	125.935	8.53552	2008-02-12	2008-03-12	News	54	873000	Heavy rain	1	707.75	382266
3274	std	TC-2008-000023-MDG	Madagascar	0	46.8984	-18.6929	2008-02-17	2008-03-05	News	93	191000	Tropical Storm, Surge	1	2314.64	135110
3279	std	0	Morocco	0	-7.11362	32.111	2008-02-26	2008-02-28	News	4	0	Heavy rain	1	15.82	1664
3280	std	0	Indonesia	0	112.368	-7.12687	2008-03-01	2008-04-03	News	3	12000	Heavy rain	1	1373.8	556962
3282	std	0	China	0	106.735	39.4142	2008-03-03	2008-04-01	News	0	13700	Snowmelt, Ice, Rain	1.5	2107.27	93627
3285	std	0	USA	0	-89.1522	36.2266	2008-03-17	2008-05-02	News	18	1000	Snowmelt, Ice, Rain	1.5	28301.5	280194
3287	std	0	Kenya	0	37.6723	2.82691	2008-03-20	2008-04-02	News	2	10000	Heavy rain	1	108.89	1087
3291	std	FL-2008-000045-BRA	Brazil	0	-42.6843	-5.35934	2008-03-30	2008-04-22	News	36	190000	Heavy rain	1	7354.55	61940
3294	otsu	0	Tanzania	0	36.457	-8.54602	2008-04-11	2008-05-16	News	0	800	Heavy rain	1	2462.84	67737
3297	std	0	Australia	0	152.548	-31.8912	2008-04-24	2008-04-27	News	0	0	Heavy rain	1	189.28	11496
3298	std	0	Canada	0	-81.9611	52.153	2008-04-26	2008-05-01	News	0	2000	Snowmelt, Ice, Rain	1	1796.94	185
3300	std	0	USA		-67.3445	46.3538	2008-04-25	2008-05-07	News	0	2500	Snowmelt, Ice, Rain	1.5	1032.09	40628
3301	std	0	China	0	113.026	30.8658	2008-05-02	2008-05-05	News	3	351	Heavy rain	1	588.99	134740
3302	std	TC-2008-000057-MMR	Burma		95.9715	16.8214	2008-05-03	2008-05-22	News	100000	1500000	Tropical Storm, Surge	1.5	8828.35	999917
3305	std	FF-2008-000063-PHL	Philippines	0	124.998	7.0952	2008-05-10	2008-05-18	News	1	50000	Tropical Storm, Surge	1	430.39	247137
3306	std	0	Russia	0	130.54	60.5005	2008-05-12	2008-05-25	News	0	700	Snowmelt, Ice, Rain	1	40705.2	53169
3311	std	FL-2008-000076-COL	Colombia	0	-74.0701	6.63469	2008-05-27	2008-05-28	News	0	400	Heavy rain	1	1001.16	3696
3312	std	0	India	0	93.755	26.4	2008-05-24	2008-05-28	News	0	0	Heavy rain	1	1825.83	487789
3323	std	FL-2008-000094-ZAF	South Africa	0	29.8704	-30.9129	2008-06-19	2008-06-22	News	0	4000	Heavy rain	1.5	402.92	28108
3325	std	0	China	0	112.304	23.5424	2008-06-24	2008-06-27	News	0	0	Tropical Storm, Surge	1.5	758.45	154795
3327	std	0	India		90.1201	25.2411	2008-07-05	2008-07-14	News	350	70000	Heavy rain	1.5	15148.6	6736689
3331	std	0	Mexico	0	6.15	35.5	2008-07-06	2008-07-11	News	12	0	Heavy rain	1.5	32.35	11233
3332	std	0	Algeria	0	-98.1487	21.3597	2008-07-15	2008-07-16	News	3	0	Heavy rain	1	1436.97	24098
3336	std	FL-2008-000111-MEX	Mexico		-102.791	29.7956	2008-07-21	2008-07-29	News	1	180	Tropical Storm, Surge	2	1240.74	4873
3338	std		India		89.7871	27.4994	2008-07-20	2008-08-08	News	142	225000	Heavy rain	2	17213.2	8360801
3339	std	0	Philippines		120.975	23.3463	2008-07-28	2008-07-29	News	4	76000	Tropical Storm, Surge	2	250.12	120772
3340	std	0	USA	0	-151.02	64.2769	2008-07-30	2008-08-11	News	0	0	Heavy rain	2	2049.16	480
3345	std	0	China	0	114.415	32.5559	2008-07-28	2008-08-08	News	0	93000	Tropical Storm, Surge	2	7805.32	1035581
3348	std	0	Chad	0	15.455	9.28889	2008-08-02	2008-08-08	News	0	0	Heavy rain	1	304.06	24732
3356	std	0	India	0	81.3801	16.6523	2008-08-05	2008-08-11	News	74	0	Heavy rain	1.5	260.36	70475
3359	std	FL-2008-000131-LAO	Pakistan		72.6347	30.7385	2008-08-09	2008-08-20	News	37	90752	Heavy rain	1.5	1957.82	648112
3360	std	0	Thailand		103.661	17.3109	2008-08-11	2008-08-20	News	130	4000	Tropical Storm, Surge	2	4937.1	234027
3365	std	0	Nepal		84.9232	26.9506	2008-08-18	2008-09-24	News	400	10000000	Heavy rain	2	31158.4	21529060
3366	std	FF-2008-000141-ETH	USA	0	-82.8587	29.657	2008-08-20	2008-08-28	News	12	400	Tropical Storm, Surge	2	4147.4	24878
3367	std	0	Ethiopia	0	33.3146	7.5848	2008-08-20	2008-08-28	News	3	18000	Heavy rain	1.5	256.03	16049
3368	std	TC-2008-000143-HTI	Chad	0	18.3503	9.2331	2008-07-20	2008-08-25	News	0	200000	Heavy rain	1.5	65.56	55909
3370	std	0	USA	0	-92.493	31.3413	2008-09-01	2008-09-02	News	0	0	Tropical Storm, Surge	1.5	894.07	1843
3371	std	0	Bangladesh	0	90.21	25.0288	2008-08-30	2008-09-08	News	0	600000	Heavy rain	1.5	36459.2	21631628
3372	std	0	India	0	94.5503	27.0442	2008-08-30	2008-09-08	News	900	1000000	Heavy rain	1.5	16973.1	5622068
3382	std	0	India	0	84.4064	20.9522	2008-09-22	2008-09-29	News	2400	0	Dam	2	18513.4	12372235
3383	std	0	Nepal		78.9384	30.5218	2008-09-22	2008-09-29	News	49	13000	Heavy rain	2	15067.7	8627859
3384	std	FF-2008-000173-VNM	Thailand	0	103.177	17.8213	2008-09-11	2008-10-04	News	0	0	Heavy rain	1.5	7870.07	336537
3394	std	FL-2008-000191-CRI	Kenya		41.9	4	2008-10-14	2008-10-16	News	3	10000	Heavy rain	1	27.08	697
3404	std	0	Ethiopia	0	43.0595	0.82945	2008-11-16	2008-11-20	News	11	500	Heavy rain	1	99.31	78180
3405	std	0	South Africa	0	20.9035	-33.0119	2008-11-12	2008-11-17	News	0	100	Heavy rain	1	52.51	698
3413	std	FL-2008-000239-NIC	Sri Lanka		80.7993	8.57029	2008-11-22	2008-12-04	News	61	171000	Tropical Storm, Surge	2	521.98	55589
3421	std	0	UK	0	-74.2318	8.99892	2008-12-13	2008-12-14	News	2	0	Heavy rain	1	4704.46	114734
3422	std	FL-2008-200246-GUY	Colombia	0	-58.5766	7.08029	2008-12-13	2009-01-12	News	76	1200000	Heavy rain	1.5	255.55	4914
3425	std	0	Indonesia	0	103.139	-3.32927	2008-12-26	2008-12-28	News	0	0	Heavy rain	1	83.22	36477
3426	std	0	Mozambique	0	34.0277	-22.9238	2008-12-26	2009-01-12	News	24	0	Heavy rain	1	702.44	38104
3427	otsu	TC-2009-00005-PHL	Philippines	0	125.04	8.44783	2008-12-28	2009-01-19	News	25	3500	Heavy rain	1	1872.05	925258
3436	std	0	Brazil	0	-44.8911	-16.5964	2009-01-08	2009-01-16	News	11	0	Heavy rain	1	6314.86	29741
3437	std	0	Philippines	0	124.958	7.12112	2009-01-20	2009-01-27	News	11	0	Heavy rain	1	977.07	413953
3441	std	0	Madagascar	0	46.5192	-17.6884	2009-01-26	2009-01-27	News	33	0	Heavy rain	1	1221.03	36287
3444	std	0	Philippines	0	122.968	9.897	2009-02-02	2009-02-12	News	0	2000	Heavy rain	1	453.56	318662
3445	std	FL-2009-000034-MAR	Morocco	0	-6.1614	32.6552	2009-02-07	2009-02-09	News	5	0	Heavy rain	2	1590.83	181212
3446	std	FL-2009-000031-DOM	Dominican Republic	0	-70.0833	19.2809	2009-02-01	2009-02-12	News	24	2000	Heavy rain	1.5	265.96	55398
3448	otsu	0	Argentina	0	-64.2917	-24.1484	2009-02-07	2009-02-12	News	0	0	Snowmelt, Ice, Rain	1.5	8597.01	17098
3452	std	FL-2009-000052-COL	Colombia	0	-76.5144	4.36564	2009-02-12	2009-02-16	News	0	3000	Heavy rain	1.5	2540.91	20785
3454	otsu	0	Angola	0	14.1475	-9.84036	2009-02-15	2009-02-17	News	1	300	Heavy rain	1	755.78	9042
3457	otsu	FL-2009-000045-BOL	Bolivia	0	-62.618	-18.7599	2009-02-01	2009-02-16	News	0	0	Heavy rain	1	45041.8	119895
3462	std	FL-2009-000063-AGO	Angola	0	16.6784	-17.076	2009-03-04	2009-03-09	News	0	0	Heavy rain	1	924.8	6228
3464	std	0	USA	0	-97.0308	48.2491	2009-03-17	2009-03-19	News	1	330	Heavy rain	1	9638.06	17762
3465	std	FF-2009-000069-IDN	Indonesia		100.731	-1.20654	2009-03-24	2009-04-20	News	0	5000	Snowmelt, Ice, Rain	2	570.27	90130
3467	std	FL-2009-000068-ZMB	Zambia	0	24.2305	-18.7599	2009-03-27	2009-03-27	News	99	1600	Dam	1	21844	138526
3474	otsu	0	USA	0	-95.5153	29.6701	2009-04-17	2009-04-27	News	0	20000	Heavy rain	1	986.33	15811
3476	std	0	USA	0	-142.302	65.4351	2009-04-22	2009-05-14	News	39	408000	Heavy rain	2	21752	5421
3485	std		Bangladesh	0	89.0861	22.164	2009-04-20	2009-05-15	News	21	15000	Heavy rain	1.5	1708.94	895134
3490	otsu	FL-2009-000117-GTM	Guatemala	0	-88.6419	13.4179	2009-06-19	2009-06-22	News	8	106000	Heavy rain	1	1853.18	43697
3493	std	FL-2009-000120-BWA	Botswana		23.312	-16.6984	2009-06-21	2009-06-28	News	13	0	Heavy rain	1.5	7418.45	26801
3494	std	FL-2009-000124-VNM	Vietnam		104.302	20.674	2009-05-10	2009-07-01	News	0	0	Heavy rain	1	88773.6	264625
3495	std	FL-2009-000123-BGD	Bangladesh	0	89.0861	25.2562	2009-07-03	2009-07-06	News	20	700000	Heavy rain	1	2662.23	1625200
3496	std	FL-2009-000122-IND	India	0	93.8215	27.481	2009-07-03	2009-07-06	News	6	0	Heavy rain	1	2315.32	1282695
3518	std	0	Philippines	0	125.367	7.6518	2009-07-25	2009-08-04	0	10	200000	Heavy rain	1.5	452.42	224977
3530	std	0	India	0	94.143	26.8177	2009-08-18	2009-08-27	0	0	300000	Heavy rain	1	7656.3	2078688
3531	std	FL-2009-000164-SEN	Senegal	0	-16.8108	14.5762	2009-08-24	2009-08-26	0	0	0	Heavy rain	1	31.63	1515
3534	std	0	Mauritania	0	2.93676	16.454	2009-08-10	2009-09-02	0	12	300000	Heavy rain	1	1824.23	166065
3536	std	0	Turkey	0	28.9505	41.09	2009-09-07	2009-09-10	0	31	0	Heavy rain	2	480.39	58191
3543	std	0	Mexico	0	-95.3112	18.5257	2009-09-10	2009-09-19	0	0	0	Heavy rain	2	139.67	3721
3544	std	FL-2009-000203-USA	USA	0	-84.8404	34.3646	2009-09-21	2009-09-28	0	8	220	Heavy rain	1.5	4622	85309
3551	std	FL-2009-000217-IND	India	0	78.233	15.7081	2009-09-25	2009-10-12	0	303	0	Heavy rain	2	6390.48	1436091
3552	std	TC-2009-000214-PHL	Philippines	0	121.422	17.5757	2009-10-02	2009-10-17	0	438	40000	Tropical Storm, Surge	2	1588.22	703560
3553	std	FL-2009-000219-NPL	Nepal	0	80.7639	29.8119	2009-10-04	2009-10-12	0	45	0	Heavy rain	2	6812.2	5625697
3555	std	0	Nigeria	0	6.5097	5.54356	2009-10-20	2009-10-26	0	0	5000	Heavy rain	1	448.75	238819
3559	std	FL-2009-000226-PRY	Paraguay	0	-56.2737	-25.0929	2009-10-26	2009-10-28	0	0	0	Heavy rain	1	3410.61	9233
3567	std	0	USA	0	-83.7465	35.1595	2009-11-10	2009-11-13	0	0	0	Tropical Storm, Surge	1	4114.93	59363
3572	std	0	Argentina		-59.0496	-32.9919	2009-11-14	2009-11-22	0	0	1793	Heavy rain	1	7109.21	4323
3577	std	FL-2009-000248-URY	Uruguay		-56.4778	-31.257	2009-11-21	2009-12-08	0	12	22000	Heavy rain	1.5	5007.03	6302
3590	std	0	Australia	0	149.058	-30.9508	2010-01-01	2010-01-13	0	0	1000	Tropical Storm, Surge	1.5	4502.73	5723
3591	std	0	Albania		20.0828	41.4664	2010-01-04	2010-01-13	0	0	1500	Heavy rain	1.5	1646.03	79945
3602	std	0	Mexico	0	-99.0036	19.9433	2010-01-26	2010-02-13	0	41	20000	Heavy rain	1	1304.61	61343
3607	std	0	Bulgaria		27.3388	41.1603	2010-02-13	2010-02-20	0	0	0	Heavy rain	1	2122.63	129825
3615	std	0	Australia	0	147.956	-26.2155	2010-02-28	2010-03-17	0	0	0	Heavy rain	2	18788.1	2479
3616	std	FL-2010-000038-ZMB	Zambia		27.7369	-16.0918	2010-03-01	2010-03-17	0	0	115	Heavy rain	1	16024.6	89922
3622	std	0	USA	0	-86.3795	32.8939	2010-03-10	2010-03-17	0	0	0	Heavy rain	1	244.71	701
3625	std	0	USA	0	-78.1191	41.3644	2010-03-10	2010-03-24	0	0	0	Dam	1	8998.92	262162
3629	std	0	USA	0	-74.873	39.4866	2010-03-27	2010-03-31	0	0	0	Heavy rain	2	1284.12	38710
3630	std	0	Latvia	0	24.7977	56.652	2010-03-27	2010-03-31	0	0	0	Snowmelt, Ice, Rain	1	1303.88	20588
3633	std	FL-2010-000070-BGD	Bangladesh	0	89.5099	22.1528	2010-03-27	2010-04-07	0	104	0	Heavy rain	1	1528.83	753907
3635	otsu	0	Serbia	0	21.7157	43.4667	2010-04-20	2010-04-22	0	0	0	Heavy rain	1	367.76	14170
3636	otsu	0	India	0	91.8623	26.3166	2010-04-18	2010-04-21	0	0	300	Heavy rain	2	10214.4	8287039
3637	otsu	0	Cuba	0	-75.3832	20.2623	2010-04-17	2010-04-21	0	0	84	Heavy rain	1	342.22	17732
3639	otsu	FL-2010-000077-NAM	Namibia		23.2312	-18.6942	2010-04-16	2010-04-21	0	0	11000	Heavy rain	1	3384.55	5802
3640	otsu	0	Indonesia	0	113.972	-2.68196	2010-04-16	2010-05-02	0	0	0	Heavy rain	1	6103.59	334293
3642	otsu	0	Yemen	0	44.3104	14.0344	2010-05-05	2010-05-06	0	7	0	Heavy rain	1	5.06	4325
3643	std	FL-2010-000086-AFG	Afghanistan	0	62.2514	34.3839	2010-05-04	2010-05-14	0	70	40000	Heavy rain	1	983.55	4046
3648	std	FF-2010-000094-CZE,	Czech Republic		19.644	49.7736	2010-05-15	2010-05-24	0	12	0	Heavy rain	2	794.77	53063
3650	std	0	India	0	93.1226	26.6381	2010-05-15	2010-06-26	0	0	10000	Heavy rain	1.5	5013.19	2188048
3651	otsu	FL-2010-000122-CHN	China	0	115.483	26.4442	2010-05-15	2010-06-28	0	379	2370000	Heavy rain	1.5	14238.2	7642017
3652	std	TC-2010-000097-IND	India	0	79.4844	15.2182	2010-05-18	2010-05-24	0	27	50000	Heavy rain	1	636.84	105393
3653	std	TC-2010-000105-GTM	Guatemala		-89.5636	14.0752	2010-05-18	2010-05-24	0	172	94000	Tropical Storm, Surge	2	780.46	11507
3654	otsu	0	New Zealand	0	169.918	-45.1567	2010-05-25	2010-05-31	0	0	0	Heavy rain	2	698.74	3902
3655	std	0	Canada	0	-97.7891	49.8757	2010-05-29	2010-05-31	0	0	0	Heavy rain	1	972.84	911
3656	std	FL-2010-000107-PHL	Philippines	0	125.3	6.77841	2010-05-29	2010-06-01	0	27	0	Heavy rain	1	532.39	282670
3657	std	0	Hungary		19.7971	49.6716	2010-05-29	2010-06-11	0	0	3000	Heavy rain	1	2146.74	119712
3658	std	TC-2010-000108-PAK	Pakistan		67.9052	25.1175	2010-06-06	2010-06-07	0	23	4000	Tropical Storm, Surge	1	556.48	6468
3659	std	0	USA	0	-94.0948	34.5778	2010-06-11	2010-06-11	0	20	0	Heavy rain	2	176.45	103
3661	std	0	France	0	6.59134	43.4973	2010-06-16	2010-06-17	0	19	0	Heavy rain	2	152.07	17319
3662	std	FL-2010-000115-MMR	Myanmar		94.0105	22.2804	2010-06-15	2010-06-26	0	60	0	Heavy rain	1	5700.96	2199055
3663	std	0	Ghana	0	-0.981038	7.93162	2010-06-22	2010-06-26	0	30	0	Heavy rain	1	287.79	29858
3665	std	0	Bosnia and Herzegovina	0	17.705	43.9872	2010-06-22	2010-06-26	0	46	0	Heavy rain	1	154.37	13572
3666	std	0	Pakistan	0	72.0792	36.027	2010-06-22	2010-06-24	0	46	0	Heavy rain	1	43.32	13451
3667	std	FL-2010-000120-BRA	Brazil	0	-37.7816	-6.35589	2010-06-22	2010-06-30	0	50	150000	Heavy rain	2	3169.89	31313
3668	std	0	Taiwan	0	121.606	24.9491	2010-06-25	2010-06-27	0	0	0	Heavy rain	1	95.85	18928
3670	std	FL-2010-000121-DOM	Dominican Republic	0	-70.3928	19.2545	2010-06-25	2010-06-27	0	0	0	Heavy rain	1	128.04	10155
3671	std	TC-2010-000123-MEX	Mexico	0	-100.417	24.3112	2010-06-30	2010-07-07	0	6	50000	Tropical Storm, Surge	2	710.03	3034
3673	std	0	Canada	0	-103.836	51.8657	2010-07-02	2010-07-06	0	0	0	Heavy rain	1.5	2128.33	1600
3674	std	FL-2010-000125-IND	India		74.7785	30.1895	2010-07-05	2010-07-15	0	98	523000	Heavy rain	1	8292.02	918872
3676	std	0	China	0	97.1282	39.4866	2010-07-06	2010-07-13	0	15	0	Heavy rain	1	2266.39	4781
3678	std	0	China	0	113.171	28.0056	2010-07-01	2010-07-15	0	600	2400000	Heavy rain	1	3767.15	390797
3679	std	0	Bangladesh	0	90.0355	23.9949	2010-07-01	2010-07-13	0	0	600000	Heavy rain	1	12486.5	5396863
3681	std	0	China	0	115.886	29.1384	2010-07-07	2010-07-23	0	0	10000	Heavy rain	1.5	4603.14	617570
3688	std	0	China	0	114.01	22.6733	2010-07-21	2010-07-23	0	1	15000	Tropical Storm, Surge	1.5	156.02	44393
3689	std	0	USA	0	-91.0026	41.0582	2010-07-25	2010-07-25	0	1	500	Dam	1	1494.42	10381
3692	std	0	China	0	111.074	31.5774	2010-07-23	2010-08-03	0	1100	300000	Heavy rain	2	11148.9	1946294
3696	std	FL-2010-000141-PAK	Pakistan	0	73.2579	33.3634	2010-07-27	2010-11-15	News	1750	10000000	Heavy rain	2	10043.2	7142718
3698	std	0	Germany		13.9953	51.4677	2010-07-27	2010-08-08	News	15	3000	Heavy rain	1.5	308.81	29488
3707	std	0	Mexico		-92.25	17.91	2010-08-15	2010-10-06	News	100	50000	Tropical Storm, Surge	2	5849.91	133233
3713	std	0	India	0	92.25	26.235	2010-09-05	2010-09-17	News	1	30000	Heavy rain	1.5	9040.6	3245498
3714	std	0	Chad	0	14.625	11.385	2010-08-15	2010-09-17	News	24	70000	Heavy rain	1.5	3855.19	341213
3716	std	0	Bangladesh	0	89.64	25.425	2010-09-09	2010-09-30	News	0	140000	Heavy rain	1.5	33610.2	23137894
3717	std	0	India	0	82.845	26.73	2010-09-18	2010-09-30	News	88	15000	Heavy rain	1.5	13151.7	12414310
3721	std	0	Mexico		-87.57	14.4	2010-09-18	2010-09-30	News	19	0	Tropical Storm, Surge	2	4309.52	69146
3722	std	0	USA	0	-90.18	44.01	2010-09-22	2010-09-30	News	0	0	Heavy rain	2	1441.56	38762
3723	std	0	Thailand	0	100.35	14.445	2010-09-20	2010-09-30	News	2	0	Heavy rain	1.5	4074.6	212350
3726	std	0	Indonesia	0	132.811	-1.22352	2010-10-02	2010-10-06	News	84	0	Heavy rain	1.5	44.99	2055
3732	std	0	Bangladesh	0	91.035	24.21	2010-10-01	2010-10-12	News	15	500000	Tropical Storm, Surge	1.5	28787.2	19362985
3734	std	0	Australia	0	144.27	-30.555	2010-10-15	2010-10-19	News	0	0	Heavy rain	1	1519.53	1270
3737	std	0	Thailand	0	102.195	15.03	2010-10-10	2010-11-15	News	206	0	Heavy rain	2	13846.5	599651
3741	std	0	Chad	0	15.21	11.205	2010-10-01	2010-11-05	News	0	0	Heavy rain	1.5	2943.98	117812
3747	std	0	Ghana	0	-0.809999	8.28	2010-11-05	2010-11-11	News	0	2600	Heavy rain	1.5	2509.53	424249
3750	std	0	Colombia	0	-72.9604	4.11351	2010-11-15	2010-12-20	News	250	800000	Heavy rain	1.5	11402.9	310621
3752	std	0	Australia	0	147.388	-29.8384	2010-11-27	2010-12-20	News	5	3000	Heavy rain	2	14040.5	9767
3754	std	0	Venezuela	0	-66.9385	9.77646	2010-11-25	2010-12-20	News	30	60000	Heavy rain	1.5	2918.84	110567
3756	std	FL-2010-000248-ALB	Greece	Albania	21.4697	40.1067	2010-12-03	2010-12-17	News	1	0	Heavy rain	1	1522.13	135958
3765	std	0	Philippines		125.566	8.13264	2011-01-01	2011-01-18	News	53	10000	Heavy rain	2	621.9	306039
3772	std		New Zealand		175.634	-36.617	2011-01-28	2011-01-31	News	0	0	Tropical Storm, Surge	1.5	32.04	1185
3775	otsu	FL-2011-000020-BOL	Bolivia		-64.0418	-21.091	2011-01-30	2011-01-31	News	31	500	Heavy rain	1	24211.6	52068
3776	otsu		Sri Lanka		80.5342	8.51316	2011-02-01	2011-02-14	News	14	250000	Heavy rain	1.5	660.8	82410
3777	std		Philippines		124.865	7.09527	2011-02-01	2011-02-04	News	11	2000	Heavy rain	1.5	417.36	138994
3778	std	FL-2011-000019-LSO	Lesotho		28.0783	-29.5025	2011-02-01	2011-02-16	News	26	5000	Heavy rain	1	201.89	2632
3782	std		Bolivia	Peru	-65.5997	-16.4659	2011-02-14	2011-02-26	News	3	10000	Heavy rain	1.5	650.66	78
3786	std		Australia		146.658	-19.7897	2011-03-07	2011-03-28	News	1	0	Heavy rain	1	15132.1	1104
3787	std		Japan		140.823	37.8022	2011-03-11	2011-03-11	News	10000	200000	Tropical Storm, Surge	2	228.76	240276
3793	std		Australia		147.327	-41.4217	2011-03-22	2011-03-28	News	0	500	Heavy rain	2	145.79	1124
3795	std		Thailand		99.277	8.66649	2011-03-23	2011-04-10	News	59	84000	Heavy rain	2	1158.19	183922
3799	std		USA	Canada	-97.2192	48.6788	2010-04-01	2011-05-24	News	5	3600	Snowmelt, Ice, Rain	2	97982.8	239676
3801	std		Kazakhstan	Russia	53.6734	51.448	2011-04-01	2011-04-19	News	0	9000	Snowmelt, Ice, Rain	1.5	18955.1	280767
3810	std		Brazil		-40.1191	-9.67979	2011-05-08	2011-05-11	News	2	15000	Heavy rain	1.5	2329.55	9471
3812	std		Canada	USA	-73.0141	45.6264	2011-05-04	2011-06-09	News	0	1300	Heavy rain	2	398.77	18611
3815	std		USA		-99.4732	43.5376	2011-06-04	2011-07-29	News	0	4600	Dam	1.5	6196.28	12600
3820	std		Philippines		125.208	8.30634	2011-06-05	2011-06-21	News	15	15000	Heavy rain	1.5	763.67	471012
3843	std		Bangladesh		89.0463	22.5641	2011-07-21	2011-07-29	News	6	10000	Heavy rain	1.5	3653.32	2131381
3846	std		Brazil		-52.6403	-30.343	2011-07-23	2011-07-29	News	10	20000	Heavy rain	1.5	3197.24	15778
3850	std		Thailand		102.822	17.0382	2011-08-05	2012-01-09	News	790	10000	Tropical Storm, Surge	2	30107.7	2967324
3853	std	FL-2011-00071-VNM	Cambodia	Viet Nam	105.501	12.0043	2011-08-10	2011-11-15	News	264	280000	Tropical Storm, Surge	2	30408.6	2868990
3854	std		India	Nepal	86.2422	26.3755	2011-08-15	2011-10-02	News	158	70000	Heavy rain	2	19633.5	14830495
3856	std		India		92.1815	26.5897	2011-08-15	2011-09-08	News	7	11000	Heavy rain	1.5	7554.41	3053616
3857	std		Pakistan		69.0669	25.0123	2011-08-12	2011-11-01	News	434	660000	Heavy rain	1.5	27621.1	2780492
3861	std		USA		-74.0621	40.1862	2011-08-27	2011-09-13	News	20	370000	Tropical Storm, Surge	2	1073	123985
3863	std		Uganda	Kenya	33.6678	1.66044	2011-08-20	2011-09-08	News	31	0	Heavy rain	1.5	659.03	74061
3864	std		India		73.9531	22.3021	2011-08-25	2011-09-13	News	0	5000	Heavy rain	1.5	1140.43	297391
3866	std		India		86.0022	20.6511	2011-09-05	2011-10-02	News	40	15000	Heavy rain	1.5	8508.44	5346754
3867	otsu		Philippines		121.548	17.343	2011-09-28	2011-10-02	News	1	180000	Tropical Storm, Surge	2	647.95	209967
3868	std		China		109.005	22.248	2011-10-01	2011-10-10	News	0	132300	Tropical Storm, Surge	1.5	175.03	48371
3870	otsu		Turkey		27.9719	39.1045	2011-10-08	2011-10-10	News	3	0	Heavy rain	1	495.48	38017
3871	std		Mexico	Gutamala	-100.833	18.2802	2011-10-10	2011-11-01	News	120	60000	Tropical Storm, Surge	2	7274.42	174991
3872	otsu		Ghana		-0.945865	5.58466	2011-10-26	2011-10-29	News	14	43000	Heavy rain	1	81.18	59417
3874	std		Kenya	Somalia	40.1672	2.18085	2011-11-09	2011-11-15	News	4	10000	Heavy rain	1.5	9.24	112
3875	std		Uganda		34.3836	2.57031	2011-11-09	2011-12-20	News	0	15000	Heavy rain	1.5	1776.05	211743
3876	std		Colombia		-73.9399	4.64089	2011-11-09	2011-12-22	News	486	80000	Heavy rain	2	6265.77	130760
3878	otsu		Indonesia		100.378	1.69854	2011-11-27	2011-11-30	News	0	500	Heavy rain	1	533.66	213408
3879	otsu		Australia		149.372	-29.4584	2011-11-27	2011-12-22	News	1	60	Heavy rain	1	17497.7	2163
3880	otsu		South Africa		30.0606	-29.2084	2011-11-27	2011-12-02	News	6	0	Heavy rain	1.5	362.77	43811
3881	otsu		Kenya		36.1168	0.385821	2011-11-29	2011-12-22	News	24	98000	Heavy rain	1.5	1391.2	147084
3884	otsu		Philippines		124.875	8.52649	2011-12-16	2011-12-22	News	957	1000	Tropical Storm, Surge	2	2228.64	872940
3886	std		Tanzania		39.0377	-6.91704	2011-12-20	2011-12-22	News	13	0	Heavy rain	2	40.58	8133
3888	otsu		Indonesia		110.236	-7.37953	2011-12-18	2012-01-04	News	10	54	Heavy rain	1	2609.39	1483584
3889	otsu		Thailand		99.4238	8.77228	2012-01-01	2012-01-09	News	0	1000	Heavy rain	1	2085.11	493124
3890	otsu	FL-2012-000003-BRA	Brazil		-43.4893	-19.4637	2012-01-01	2012-01-09	News	8	14000	Heavy rain	1	3135.71	34169
3892	otsu	FL-2012-000017-MWI	Mozambique	South Africa	34.0721	-21.4513	2012-01-17	2012-02-14	News	37	100000	Tropical Storm, Surge	1.5	2788.23	147787
3893	otsu		Fiji		178.076	-17.784	2012-01-22	2012-02-06	News	8	3500	Heavy rain	1.5	45.24	0
3894	std		Australia		146.646	-21.7176	2012-01-22	2012-03-07	News	2	13000	Heavy rain	2	31821	2918
3895	otsu		Indonesia		112.51	-7.48277	2012-01-27	2012-01-29	News	6	3000	Heavy rain	1.5	401.33	411175
3896	otsu	FL-2012-000019-BGR	Bulgaria		24.2576	42.555	2012-02-01	2012-02-06	News	5	1000	Dam	1.5	130.23	5521
3897	std		Greece		21.0056	39.8677	2012-02-03	2012-02-06	News	1	200	Heavy rain	1	26.41	17839
3899	otsu		Indonesia		106.658	-6.31874	2012-02-12	2012-02-14	News	0	6800	Heavy rain	1	2269.68	1445829
3900	otsu		Philippines		125.265	8.22392	2012-02-20	2012-02-27	News	0	25000	Heavy rain	1	1300.6	883447
3901	otsu		Nigeria	Camaroun	12.8074	9.85967	2012-02-20	2012-02-27	News	5	300	Heavy rain	1	769.61	17920
3902	std		Indonesia		103.416	-2.58568	2012-02-20	2012-02-27	News	0	1200	Heavy rain	1	945.53	169848
3904	otsu		Tunisia		8.69862	35.1163	2012-02-25	2012-02-27	News	3	1000	Heavy rain	1.5	1426	107586
3906	std	FL-2012-000037-PSE	Gaza		34.4615	31.4583	2012-03-04	2012-03-07	News	0	1200	Heavy rain	1	1618.48	294348
3910	std		Ecuador		-79.4951	-0.5987	2012-03-01	2012-03-26	News	10	4700	Heavy rain	1.5	4324.21	69356
3914	std		Philippines		123.278	13.6288	2012-03-26	2012-03-30	News	4	0	Heavy rain	1	258.21	101799
3915	std		Haiti	Dominican Republic	-72.5821	19.4433	2012-04-08	2012-04-26	News	9	11000	Heavy rain	1.5	179.25	27226
3916	std	FL-2012-000063-RUS	Russia		40.2645	55.6236	2012-04-08	2012-04-26	News	0	2600	Snowmelt, Ice, Rain	1	29906.5	516821
3917	std		Kenya		36.2141	-2.44123	2012-04-09	2012-04-26	News	0	50	Heavy rain	1	2867.43	74569
3919	std	FL-2012-000056-PRY	Paraguay	Argentina	-59.2722	-23.6467	2012-04-05	2012-04-26	News	2	5000	Heavy rain	1.5	2762.37	22955
3925	std		Brazil		-62.0228	-3.64908	2012-05-01	2012-05-07	News	0	3000	Heavy rain	2	7662.59	36813
3931	std		Russia		157.95	68.0009	2012-05-20	2012-05-29	News	0	1000	Heavy rain	1.5	11429.2	5761
3948	std		USA		-95.8087	29.578	2012-07-13	2012-07-16	News	0	100	Heavy rain	1.5	718.66	3096
3960	std		India		82.3216	19.4398	2012-08-03	2012-08-06	News	0	2000	Heavy rain	1	92.71	31143
3962	otsu		UK		-2.59334	55.5746	2012-08-04	2012-08-06	News	0	0	Heavy rain	1	403.83	414411
3963	otsu		China		122.594	40.5195	2012-08-03	2012-08-06	News	2	800000	Tropical Storm, Surge	2	507.2	105375
3965	otsu		China		103.73	31.1602	2012-08-14	2012-08-20	News	13	14600	Heavy rain	1	2224.44	849444
3966	std		India		82.7962	20.9855	2012-08-16	2012-08-20	News	1	210	Heavy rain	1	4.63	123
3969	std	FL-000139-JPN	Japan		135.556	34.6167	2012-08-12	2012-08-20	News	3	1000	Heavy rain	1.5	111.75	360119
3971	std		Senegal		-15.4943	14.462	2012-08-24	2012-08-29	News	4	1200	Heavy rain	1.5	124.4	10998
3974	std	FF-2012-000148-PAK	Pakistan		73.5222	35.0305	2012-08-23	2012-08-29	News	26	1200	Heavy rain	1.5	1043.72	318230
3975	std		China		106.115	37.3916	2012-08-25	2012-08-29	News	6	30	Heavy rain	1.5	1079.77	13397
3976	std		Nigeria	Camaroun	12.1089	9.30166	2012-08-25	2012-09-26	News	127	20000	Heavy rain	1.5	6957.81	915535
3977	std		USA		-89.346	30.503	2012-08-28	2012-09-07	News	1	60000	Tropical Storm, Surge	1.5	2717.37	6318
3979	std	TC-2012-000159-PRK	North Korea	South Korea	126.246	38.1949	2012-08-17	2012-09-07	News	59	24000	Tropical Storm, Surge	1.5	318.75	163171
3980	std		Uganda		32.726	2.65647	2012-08-20	2012-09-07	News	0	15000	Heavy rain	1	671.88	40136
3981	std		Kenya		35.8295	1.36637	2012-08-15	2012-09-07	News	0	3000	Heavy rain	1	1177.04	83188
3982	otsu		The Gambia		-16.1515	13.4093	2012-09-02	2012-09-07	News	0	41	Heavy rain	1	1345.69	246799
3983	otsu		India		76.8569	31.3063	2012-09-16	2012-09-18	News	45	200	Heavy rain	2	22198.9	15526445
3984	std		Pakistan		68.7756	28.0445	2012-09-10	2012-10-29	News	400	742000	Heavy rain	1.5	13693.7	1778275
3985	otsu		Thailand		99.6405	17.0909	2012-09-12	2012-09-26	News	0	3000	Heavy rain	1	19058.7	2618604
3991	std		South Sudan	Sudan	29.586	9.56942	2012-09-07	2012-10-03	News	15	3000	Heavy rain	1	1660.81	176134
3992	std		Somalia		44.8967	4.94456	2012-09-22	2012-10-03	News	6	12200	Heavy rain	1.5	56.18	9392
3994	std		Niger		2.95649	14.316	2012-09-15	2012-10-15	News	91	0	Heavy rain	1	1315.67	45665
3995	otsu		Chad		20.5066	11.0786	2012-09-15	2012-10-15	News	0	17000	Heavy rain	1	7381.26	539374
4001	std		India		78.8042	11.8283	2012-11-04	2012-11-08	News	40	70000	Tropical Storm, Surge	2	1749.85	755165
4005	std		Philippines		124.469	7.98723	2012-12-04	2012-12-04	News	74	60000	Tropical Storm, Surge	2	370.31	128699
4006	std		Turkey		28.7097	39.5093	2012-12-02	2012-12-04	News	1	0	Heavy rain	1	1040.52	247395
4007	std		Argentina		-59.6252	-27.5025	2012-11-20	2012-12-04	News	6	10000	Heavy rain	1.5	4288.57	16498
4009	otsu		UK		-1.19371	53.4569	2012-11-20	2012-12-18	News	4	1700	Heavy rain	1	14594.4	3831559
4013	std		Indonesia		121.883	-3.86702	2013-01-03	2013-01-10	News	8	1000	Heavy rain	1	336.61	26524
4016	std		Philippines		125.308	7.25699	2013-01-04	2013-01-10	News	0	3180	Heavy rain	1	333.24	150642
4017	std		Peru		-76.4573	-9.28298	2013-01-04	2013-01-10	News	0	2000	Heavy rain	1.5	360.75	1670
4019	std		Palestine	Syria	36.4502	32.8398	2013-01-08	2013-01-10	News	2	1600	Heavy rain	1.5	974.6	185906
4020	std	FL-2013-000006-IDN	Indonesia		106.73	-6.17945	2013-01-13	2013-01-22	News	32	46000	Heavy rain	2	211.5	95436
4022	std		Kenya		36.5172	0.058024	2013-01-13	2013-01-17	News	20	400	Heavy rain	1	2264.08	148039
4023	std		Mozambique	Zimbabwe	32.6773	-24.8006	2013-01-17	2013-03-04	News	135	170000	Heavy rain	1.5	2600.52	83225
4024	std		Australia		144.818	-19.3725	2013-01-22	2013-02-01	News	6	8000	Tropical Storm, Surge	1.5	6563.26	2471
4026	std	Fl-2013-000014-BWA	Botswana	South Africa	25.0646	-20.3766	2013-01-15	2013-02-01	News	0	400	Heavy rain	1.5	3634.25	3027
4028	std	FL-2013-000017-PNG	Papua New Guinea		144.477	-5.88736	2012-12-01	2013-02-12	News	0	500	Heavy rain	1	1580.7	31113
4032	std		Indonesia		104.265	-2.41871	2013-02-20	2013-03-04	News	0	1000	Heavy rain	1.5	2.63	0
4037	std		Namibia		22.6244	-17.8146	2013-03-01	2013-03-17	News	0	10000	Heavy rain	1	12528.4	53392
4051	std		USA	Canada	-97.5977	48.5643	2013-04-27	2013-04-29	News	0	0	Snowmelt, Ice, Rain	1	11589	13223
4055	std		Somalia		43.6553	2.16964	2013-05-01	2013-05-16	News	7	50000	Heavy rain	2	166.64	50155
4075	std		Paraguay		-57.6536	-24.146	2013-07-04	2013-07-15	News	0	52000	Heavy rain	1.5	6681.15	47748
4078	std		Pakistan	Afghanistan	70.6377	32.8144	2013-08-01	2013-08-07	News	135	81000	Heavy rain	1.5	9718.41	810604
4079	std		Russia	China	128.424	50.0043	2013-08-01	2013-08-07	News	0	1500	Heavy rain	2	6419.45	223259
4082	std		Pakistan		69.1065	28.7404	2013-08-07	2013-08-21	News	70	12000	Heavy rain	1.5	16475.1	3999133
4083	std		China	Russia	130.272	50.5323	2013-08-07	2013-10-14	News	100	260000	Heavy rain	2	64044.4	1216470
4090	std		Cambodia		105.084	12.658	2013-09-27	2013-10-14	News	122	60000	Heavy rain	1.5	22300.4	1250789
4092	std		Thailand		101.694	13.0819	2013-09-30	2013-10-14	News	42	982799	Heavy rain	1.5	24193.4	996671
4094	std		South Sudan		28.8241	7.73724	2013-10-08	2013-10-14	News	0	3300	Heavy rain	1	1536.46	102537
4098	std		India		85.9321	24.7174	2013-10-12	2013-11-10	News	7	0	Heavy rain	1.5	12851.3	8398628
4101	std		USA		-98.0111	30.6607	2013-10-31	2013-11-10	News	4	4800	Heavy rain	2	260.07	921
4105	std	FL-2013-000141-SOM	Somalia		57.4276	21.6819	2013-11-08	2013-11-19	News	100	0	Tropical Storm, Surge	1.5	245.04	31951
4111	otsu		UK	Ireland	-1.51144	53.2732	2013-12-27	2014-02-07	News	0	200	Heavy rain	1.5	16176.9	5911646
4115	std		USA		-86.7899	37.5597	2013-12-22	2014-01-04	News	5	0	Heavy rain	1	2675.95	33779
4117	std	FL-2014-000008-BOL	Bolivia		-64.0135	-13.3888	2014-01-10	2014-05-01	News	60	84000	Heavy rain	2	45778.2	83169
4130	std		Australia		150.117	-26.2415	2014-03-24	2014-03-30	News	1	0	Heavy rain	1.5	692.73	1645
4137	std		Tanzania		38.9689	-7.19301	2014-04-18	2014-05-01	News	41	0	Heavy rain	1.5	1435.13	78166
4140	std		Tanzania		38.9442	-7.66435	2014-05-10	2014-05-16	News	0	22000	Heavy rain	1	1014.86	61286
4146	otsu		China		113.342	23.2652	2014-05-30	2014-06-10	News	6	500	Heavy rain	1	3992.29	7568984
4150	std		Paraguay	Brazil	-53.547	-24.3541	2014-06-03	2014-07-14	News	9	265000	Heavy rain	2	29001.3	138214
4153	std		Philippines		124.73	6.7719	2014-06-17	2014-06-25	News	0	35000	Heavy rain	1	592.67	342216
4154	std		India		94.716	27.8115	2014-06-23	2014-06-25	News	0	10000	Heavy rain	1	201.58	67358
4156	std		Thailand		99.739	19.8258	2014-07-11	2014-07-14	News	0	500	Heavy rain	1	188.65	1723
4157	std		New Zealand		174.068	-35.6989	2014-07-05	2014-07-14	News	0	0	Heavy rain	1	197.18	10363
4159	std		Brazil		-59.5597	-2.92934	2014-05-22	2014-07-29	News	0	0	Heavy rain	2	36389.9	195904
4163	std		Brazil	Uruguay	-58.0256	-32.3467	2014-07-03	2014-07-29	News	10	50000	Heavy rain	2	13321.4	40061
4171	std		India		79.7586	27.3852	2014-08-11	2014-09-08	News	31	4000	Heavy rain	1.5	7702.74	3497420
4174	std		India		86.2537	26.1795	2014-08-14	2014-09-08	News	0	10000	Heavy rain	1.5	7580.46	3225770
4175	std		Niger		6.40648	16.3273	2014-08-13	2014-08-19	News	12	10000	Heavy rain	1	312.32	2834
4176	std		India		94.6542	27.6132	2014-08-15	2014-09-08	News	1	75000	Heavy rain	1	13153	4580588
4178	std		Bangladesh		90.6333	24.5661	2014-08-20	2014-09-08	News	17	500000	Heavy rain	1.5	25826.5	11058729
4179	std		Pakistan	India	75.3419	33.9449	2014-09-01	2014-10-11	News	300	30000	Heavy rain	2	6367.43	4206199
4184	std		Thailand		100.457	16.4039	2014-09-01	2014-09-08	News	0	400	Heavy rain	1	1247.48	19352
4186	std		South Sudan		32.9068	6.94173	2014-09-21	2014-10-11	News	7	3000	Heavy rain	1	924.12	83844
4188	std		India		92.4891	26.7465	2014-09-24	2014-10-11	News	59	30000	Heavy rain	1.5	17583.3	7868742
4189	std		Philippines		121.612	14.6575	2014-09-19	2014-10-11	News	5	83000	Tropical Storm, Surge	1.5	887.37	492670
4197	std		Mexico		-98.4317	21.7845	2014-10-18	2014-10-27	News	6	4000	Tropical Storm, Surge	1.5	1579.96	37436
4198	std		India		79.6967	18.4473	2014-10-12	2014-10-27	News	42	0	Tropical Storm, Surge	1.5	8353.39	1964575
4199	std		Spain		-16.5329	28.2782	2014-10-19	2014-10-22	News	1	0	Heavy rain	1	144.17	15537
4201	std		Somalia	Ethiopia	45.2538	4.13428	2014-10-24	2014-11-16	News	0	21000	Heavy rain	1.5	717.7	209997
4206	std		Thailand		99.5163	8.02409	2014-11-07	2014-11-16	News	0	1000	Heavy rain	1	283.31	89353
4211	std		Bulgaria	Greece	27.7106	41.4579	2014-12-04	2014-12-14	News	40	1000	Heavy rain	1.5	4068.64	296055
4213	std		USA		-123.101	39.7967	2014-12-11	2014-12-14	News	3	0	Heavy rain	1	628.81	15072
4215	std		Sri Lanka		80.9834	7.90972	2014-12-20	2015-01-01	News	39	1000000	Heavy rain	1.5	591.71	69479
4216	std	FL-2014-000168-MYS	Malaysia	Thailand	102.164	4.72508	2014-12-20	2015-01-01	News	34	215000	Heavy rain	2	348.14	100896
4217	std		Philippines		124.903	8.65608	2014-12-10	2015-01-01	News	53	80186	Tropical Storm, Surge	1.5	1079.36	577820
4218	std		Australia		127.056	-19.1872	2015-01-05	2015-01-11	News	1	0	Heavy rain	1.5	4118.26	211
4219	std	FL-2015-000006-MWI	Malawi	Mozambique	35.3564	-18.7946	2015-01-01	2015-02-09	News	276	336000	Heavy rain	2	3777.23	154540
4220	std	FL-2015-000008-BOL	Bolivia		-63.7661	-16.4638	2015-01-05	2015-02-09	News	23	1000	Heavy rain	1.5	1390.48	2778
4221	std	FL-2015-000009-ALB	Greece	Albania	26.5972	41.4571	2015-02-01	2015-02-09	News	3	500	Heavy rain	1.5	4129.96	306237
4222	std		Indonesia		122.862	0.686073	2015-02-05	2015-02-09	News	0	300	Heavy rain	1	527.43	48030
4224	std	FL-2015-000004-MDG	Madagascar		45.9218	-19.6675	2015-01-05	2015-02-09	News	0	20000	Tropical Storm, Surge	1.5	1896.77	141438
4225	std		Bolivia	Peru	-65.8445	-11.5042	2015-02-20	2015-02-24	News	0	4000	Heavy rain	1.5	1433.98	8814
4226	std		Australia		135.716	-18.2	2015-02-22	2015-02-24	News	0	350	Tropical Storm, Surge	1.5	1849.6	72
4227	std		Dominican Republic		-69.8035	19.3285	2015-02-20	2015-02-24	News	0	12000	Heavy rain	1	176.98	19635
4230	std		USA		-86.2332	37.0268	2015-03-10	2015-03-23	News	0	0	Heavy rain	1.5	2767.77	10738
4231	std		Indonesia		108.399	-6.55868	2015-03-15	2015-03-23	News	0	4000	Heavy rain	1	977.53	372170
4233	std		Angola		13.6811	-8.81664	2015-03-09	2015-03-23	News	0	1000	Heavy rain	1.5	466.91	940
4239	std	FL-2015-000029-IND	India		76.4058	33.1767	2015-03-20	2015-03-31	News	44	2907	Heavy rain	1.5	582.26	359331
4241	std		Madagascar		47.0106	-18.1557	2015-03-05	2015-04-15	News	0	25000	Heavy rain	1.5	2903.78	485941
4242	std		Kazakhstan		65.5929	48.4049	2015-03-23	2015-04-15	News	0	5600	Snowmelt, Ice, Rain	1	28700.4	428320
4251	std		India		79.1771	10.7121	2015-05-17	2015-05-21	News	8	200	Heavy rain	1	284.39	147059
4258	std		Russia		81.5277	58.1901	2015-05-15	2015-06-02	News	0	1200	Heavy rain	1	54174.2	109025
4259	std	FL-2015-000064-IND	India		93.8747	26.9195	2015-06-02	2015-06-29	News	3	9000	Heavy rain	1.5	6518.62	2658384
4265	std		India		70.7643	21.8734	2015-06-24	2015-06-29	News	81	9000	Heavy rain	1.5	178.52	27783
4272	std		Pakistan		72.2737	34.3432	2015-07-15	2015-08-19	News	166	803000	Heavy rain	1.5	4892.08	2988676
4274	otsu		USA		-83.165	38.3887	2015-07-18	2015-07-21	News	3	0	Heavy rain	1.5	1036.33	61063
4275	std		Guyana		-58.7431	6.66576	2015-07-16	2015-07-21	News	0	0	Heavy rain	1.5	44.01	1355
4276	otsu		Brazil		-50.751	-25.5689	2015-07-10	2015-07-21	News	3	1000	Heavy rain	1	6374.47	12774
4280	std	FL-2015-000098-VNM	Vietnam		106.865	20.8137	2015-07-25	2015-08-05	News	20	3000	Heavy rain	2	665.51	66595
4282	std		India		82.6165	26.2074	2015-07-15	2015-08-19	News	206	300000	Tropical Storm, Surge	2	22632	7756830
4283	std		Myanmar		95.5326	20.1747	2015-07-15	2015-08-19	News	88	85400	Heavy rain	2	4388.13	536753
4288	std		India		93.751	26.8946	2015-08-13	2015-09-11	News	5	18000	Heavy rain	1	12696.5	5214625
4293	std		Vietnam	Laos	104.762	20.5669	2015-09-07	2015-09-11	News	2	100	Heavy rain	1	1007.61	92204
4294	std		Nigeria		11.5284	9.95267	2015-08-30	2015-09-11	News	30	2000	Heavy rain	1.5	1179.25	139476
4300	std	TC-2015-000143-PHL	Philippines		121.241	16.691	2015-10-22	2015-10-28	News	54	60000	Tropical Storm, Surge	2	1205.14	646497
4301	std		Uruguay,	Brazil	-53.5718	-29.9568	2015-10-14	2015-10-28	News	0	10000	Heavy rain	2	10859.8	15691
4305	std		Egypt		30.4819	31.0422	2015-10-24	2015-10-28	News	0	6	Heavy rain	1.5	2571.4	225462
4306	std	TC-2015-000142-BHS	Bahamas		-73.8324	22.4916	2015-10-02	2015-10-08	News	0	300	Tropical Storm, Surge	1.5	1626.34	1016
4309	std	TC-2015-000163-IND	India		78.8554	11.8278	2015-11-10	2015-12-04	News	180	400000	Tropical Storm, Surge	2	2365.66	1199024
4314	std		USA		-91.0829	35.6658	2015-12-15	2016-01-29	News	31	4000	Heavy rain	2	33233.6	213406
4315	std	FL-2015-000171-PRY	Paraguay	Uruguay	-55.8482	-26.0369	2015-12-01	2016-01-29	News	12	170000	Heavy rain	2	35250.9	74608
4317	std		Kenya		39.5133	-2.03643	2015-12-01	2016-01-06	News	112	100000	Heavy rain	1.5	277.87	71105
4318	std	TC-2015-000170-PHL	Philippines		121.229	12.8357	2015-12-12	2016-01-06	News	40	20000	Tropical Storm, Surge	1.5	2019.24	1095511
4319	otsu		UK	Ireland	-2.77486	54.9868	2015-12-05	2016-01-26	News	3	64000	Heavy rain	2	17313.5	5039450
4322	std		Brazil		-43.229	-22.5227	2016-01-15	2016-01-29	News	0	500	Heavy rain	1	187.3	982
4324	std	FL-2006-000011-TZA	Tanzania		35.5048	-4.76168	2016-01-14	2016-01-29	News	1	400	Heavy rain	1	3616.46	57424
4325	std		Brazil		-56.442	-17.9555	2016-01-05	2016-01-29	News	0	1700	Heavy rain	1	6264.35	14582
4326	std		Ecuador	Colombia	-79.7009	-0.786333	2016-01-19	2016-01-29	News	7	2300	Heavy rain	1.5	1277.72	14144
4327	std		Australia		145.712	-41.858	2016-01-27	2016-01-29	News	0	0	Heavy rain	1.5	66.97	1746
4328	std		UK		-3.83733	55.1834	2016-01-27	2016-01-29	News	0	0	Heavy rain	1.5	703.41	484695
4330	std	FL-2016-000009-IDN	Indonesia	Malaysia	103.352	-2.46543	2016-01-18	2016-03-10	News	1	37000	Heavy rain	1	2724.28	569610
4334	std		Serbia		21.0546	44.671	2016-03-06	2016-03-10	News	0	420	Heavy rain	1.5	439.94	6147
4335	std		Bolivia		-64.929	-12.843	2016-02-28	2016-03-10	News	0	120	Heavy rain	1	330.19	1776
4337	std		USA		-96.1058	30.9086	2016-03-08	2016-03-25	News	5	3500	Heavy rain	2	10794.4	28286
4339	std	FL-2016-000021-PAK	Pakistan		71.7788	33.0545	2016-03-12	2016-04-13	News	121	2400	Heavy rain	1.5	1125.88	572603
4340	std		Argentina		-63.1227	-28.5633	2016-03-05	2016-03-25	News	0	1600	Heavy rain	1	10232	11633
4346	std		Uruguay	Argentina	-58.2235	-31.1431	2016-04-01	2016-04-13	News	1	10000	Heavy rain	2	16886.4	21974
4350	std		Uruguay		-56.1946	-32.4347	2016-04-12	2016-05-11	News	10	10000	Heavy rain	2	22756	36941
4355	std		India	Bangladesh	95.6068	27.464	2016-04-20	2016-05-01	Flood List	18	3000	Heavy rain	1.5	7337.34	1695401
4357	std		Tanzania		35.9997	-6.89427	2016-04-22	2016-05-30	Flood List	5	14000	Heavy rain	1.5	3266.74	162245
4358	std		Russia		47.0353	51.3145	2016-04-15	2016-05-30	DFO	0	0	Snowmelt, Ice, Rain	1	14571.8	140854
4359	std	FL-2016-000056-USA	USA		-95.5367	30.8574	2016-05-26	2016-06-24	Flood List	11	0	Heavy rain	1.5	3333.85	14083
4364	std	FF-2016-000062-IND	Indonesia		110.032	-7.47687	2016-06-17	2016-06-24	News	43	0	Heavy rain	1.5	1002.7	355255
4365	std	FL-2016-000058-MMR	Myanmar		95.2604	18.3158	2016-06-01	2016-08-16	News	16	25000	Heavy rain	2	10414.8	1387481
4369	std		Sudan		34.2429	12.5198	2016-06-30	2016-07-06	News	0	4000	Heavy rain	1	59.24	20232
4376	std		Malaysia		101.075	5.1723	2016-07-18	2016-07-19	News	0	441	Heavy rain	1	134.75	24903
4378	std		India		80.8349	22.8107	2016-07-07	2016-08-03	News	20	15000	Heavy rain	1.5	3698.86	2000382
4381	std		South Africa		32.2882	-27.595	2016-07-25	2016-08-03	News	7	0	Heavy rain	1	473.28	11191
4382	std	FL-2016-000075-BGD	Bangladesh		90.0395	24.095	2016-07-25	2016-08-26	News	42	25000	Heavy rain	1.5	37798.4	18456496
4386	std		USA		-77.2142	39.3339	2016-07-30	2016-07-31	News	2	0	Heavy rain	2	5.11	502
4388	std		USA		-91.8005	29.9879	2016-08-14	2016-08-26	News	13	40000	Heavy rain	2	1179.92	5584
4390	std		Thailand		96.8687	26.3474	2016-08-15	2016-08-26	News	0	0	Heavy rain	1	1823.59	54322
4391	std		Mali		5.09507	15.485	2016-09-14	2016-09-22	News	0	0	Heavy rain	1.5	84.6	11084
4403	std		Thailand		100.395	14.8667	2016-10-06	2016-10-16	News	3	100000	Heavy rain	1.5	2416.57	61016
4412	std		Argentina	Uruguay	-55.6697	-34.6637	2016-10-10	2016-11-10	News	0	50	Heavy rain	1.5	13261.2	35535
4423	std		Thailand		100.753	14.4448	2016-12-01	2016-12-07	News	11	0	Heavy rain	1.5	2958	175143
4427	std		Argentina		-59.8071	-33.7708	2016-12-26	2017-01-05	News	1	700	Heavy rain	1.5	7602.03	30878
4428	std		Australia		133.489	-21.5215	2016-12-25	2017-01-05	News	0	100	Heavy rain	1.5	5168.7	90
4432	std	FL-2017-000004-THA	Thailand		100.061	7.30494	2016-12-31	2017-02-07	News	96	1000000	Heavy rain	1.5	1137.85	254312
4434	std		USA		-122.458	39.6236	2017-01-04	2017-01-05	News	0	0	Heavy rain	1.5	828.57	12919
4435	std		Brazil	Argentina	-55.5512	-29.4094	2017-01-05	2017-01-21	News	0	0	Heavy rain	1	7941.87	31830
4439	std	FL-2017-000012-MOZ	Mozambique		34.5151	-20.7778	2017-01-01	2017-02-07	News	6	1200	Heavy rain	1.5	802.68	52635
4444	std		USA		-120.825	38.804	2017-02-16	2017-03-03	News	5	14000	Heavy rain	1.5	6169.11	50888
4451	std		Australia		150.76	-31.6956	2017-03-13	2017-03-22	News	1	0	Heavy rain	1	847.66	5155
4455	std	FL-2017-000027-NAM	Namibia		17.0462	-20.5698	2017-03-09	2017-03-22	News	0	0	Heavy rain	1	801.58	9499
4458	otsu	TC-2017-000031-AUS	Australia	New Zealand	148.682	-21.975	2017-03-28	2017-04-08	News	6	20000	Tropical Storm, Surge	2	3898.29	16495
4459	otsu		Bangladesh		90.6828	24.3178	2017-03-30	2017-04-18	News	0	0	Heavy rain	1	7006.88	2681462
4461	std		New Zealand		176.79	-38.2042	2017-04-05	2017-04-21	News	0	2200	Heavy rain	2	148.32	19391
4462	std		Argentina		-67.9388	-45.9533	2017-04-05	2017-04-21	News	1	8000	Tropical Storm, Surge	1.5	1418.57	7822
4464	std	FL-2017-000039-ARG	Argentina		-62.6279	-27.4231	2017-04-05	2017-04-21	News	0	0	Heavy rain	1.5	15648.6	16130
4465	std	FL-2017-000040-KAZ	Kazakhstan		70.0468	51.2542	2017-04-14	2017-04-21	News	0	7000	Snowmelt, Ice, Rain	1.5	68991.9	134383
4472	std		Kenya		37.8802	-2.87879	2017-05-08	2017-05-15	News	13	6000	Heavy rain	1	904.06	15117
4483	std	FL-2017-000064-IND	India		94.9387	27.6131	2017-06-02	2017-07-03	News	6	113	Heavy rain	1	5973.76	1050681
4485	std		Philippines		125.249	7.76344	2017-06-12	2017-06-14	News	0	0	Heavy rain	1	608.6	359310
4495	std		Venezuela		-67.5271	7.83511	2017-08-04	2017-08-21	News	0	1080	Heavy rain	1.5	10384	49558
4499	std		India		88.0848	22.9061	2017-07-27	2017-08-10	News	39	47000	Heavy rain	1	3613.38	1558838
4500	std	FF-2017-000101-VNM	Vietnam		105.158	21.6577	2017-08-02	2017-08-10	News	12	3600	Heavy rain	1	205.2	27690
4503	std		Germany		9.92006	52.9946	2017-07-25	2017-07-29	News	0	12	Heavy rain	1.5	131.25	5438
4507	std		India		79.076	28.1657	2017-08-10	2017-08-26	News	253	422106	Heavy rain	2	22260	4982993
4508	std	FL-2017-000108-BGD	Bangladesh		90.0148	24.5912	2017-08-10	2017-08-26	News	117	300000	Heavy rain	1.5	30764.2	13271467
4515	std	TC-2017-000120-CHN	China		114.139	22.3851	2017-08-23	2017-08-26	News	16	0	Tropical Storm, Surge	2	202.12	72361
4516	std	TC-2017-000132-CUB	USA	Cuba	-81.6252	28.5942	2017-09-08	2017-09-19	News	84	3000	Tropical Storm, Surge	2	9990.79	108896
4562	std		Paraguay		-57.5988	-25.312	2018-01-13	2018-01-22	News	0	5000	Heavy rain	1	3289.3	2352
4569	std	FL-2018-000014-ARG	Argentina		-63.2465	-24.4842	2018-02-01	2018-02-21	FloodList and News	0	10000	Heavy rain	1.5	20331.2	19753
4577	std	FL-2018-000015-BOL	Bolivia		-64.0135	-14.4053	2018-02-10	2018-02-21	News	6	12000	Heavy rain	1.5	2013.86	4130
4579	std		Australia		145.218	-17.0152	2018-03-05	2018-03-26	FloodList	0	100	Heavy rain	1.5	2711.07	315
4580	std		Albania		19.9412	40.8656	2018-03-07	2018-03-14	FloodList	0	800	Snowmelt, Ice, Rain	1	1082.36	53598
4581	std		Croatia	Bosnia and Herzegovina	16.9472	44.7349	2018-03-10	2018-03-14	FloodList	0	10	Snowmelt, Ice, Rain	1	1564.28	53495
4583	std		Greece		22.5392	39.6868	2018-02-26	2018-03-02	FloodLIst	0	30	Heavy rain	1	571.86	16268
4584	std		Indonesia		118.569	-8.49749	2018-03-05	2018-03-06	FloodList	0	3000	Heavy rain	1.5	10.82	3266
4586	std		Angola		16.007	-11.2471	2018-03-01	2018-03-14	FloodList	8	3000	Heavy rain	1.5	13433.8	68232
4589	std		USA		-121.122	37.9118	2018-03-21	2018-03-24	FloodList	0	30000	Heavy rain	1.5	988.7	10375
4590	std		Madagascar		47.8271	-16.6692	2018-03-16	2018-03-23	FloodList	17	6000	Tropical Storm, Surge	1.5	994.21	249626
4594	std		USA		-88.1137	38.2921	2018-04-03	2018-04-08	FloodList	0	12	Heavy rain	1.5	1883.74	3693
4597	std		Greece	Bulgaria	26.6714	41.5317	2018-03-25	2018-04-08	FloodList	0	0	Heavy rain	1.5	2818.83	57706
4602	std		Burundi		29.6406	-4.01486	2018-04-28	2018-05-01	FloodList	0	2576	Heavy rain	1	1792.27	76263
4603	std		Rwanda		30.0118	-1.78399	2018-04-23	2018-04-25	FloodList	18	360	Heavy rain	1.5	1424.82	79781
4632	otsu		Myanmar		93.8747	21.9855	2018-06-15	2018-06-20	FloodList	1	1000	Heavy rain	1.5	5176.24	1207989
4640	std		India	Pakistan	75.1439	33.3752	2018-06-25	2018-07-11	FloodList	3	0	Heavy rain	1	2104.94	224236
4645	std		Pakistan		72.5706	33.3024	2018-07-03	2018-07-11	FloodLIst	6	13	Heavy rain	1	2131.48	207714
4652	std		Cambodia		104.477	11.9888	2018-07-17	2018-07-23	FloodList	0	6800	Tropical Storm, Surge	1.5	742.49	22641
4653	otsu		Vietnam		105.925	21.1736	2018-07-17	2018-07-23	FloodList	5	1400	Tropical Storm, Surge	1.5	1850.43	1028105
4654	std		Mongolia		91.4251	47.6723	2018-07-11	2018-07-19	FloodList	0	30	Heavy rain	1	13803.5	54897
4662	std		Colombia	Venezuela	-68.2941	2.75369	2018-07-26	2018-09-04	FloodList	0	5000	Heavy rain	1.5	6205.09	31258
4665	otsu		India		94.1222	27.2914	2018-08-02	2018-08-10	FloodList	0	25000	Heavy rain	1.5	24544.7	16424780
4666	otsu		Myanmar		95.4336	18.1914	2018-07-15	2018-08-10	FloodList	11	120000	Heavy rain	1.5	6465.2	1209418
4667	otsu		Nigeria		8.2375	10.4748	2018-08-20	2018-10-02	FloodList	108	148000	Heavy rain	2	8403.28	1448274
4673	otsu		India		82.4309	25.7354	2018-09-01	2018-09-07	FloodList	20	1000	Heavy rain	1.5	12989.1	17213562
4676	std		USA		-78.9091	35.0642	2018-09-15	2018-10-02	FloodList	12	1500000	Tropical Storm, Surge	2	437.99	14709
4683	std		Ghana		-1.06606	9.53755	2018-09-01	2018-10-02	FloodList	34	100000	Dam	1.5	1866.91	79032
4695	std		Mexico		-105.236	23.7218	2018-10-23	2018-10-27	News Reports	0	0	Tropical Storm, Surge	1.5	2720.37	23128
4703	otsu		Paraguay		-57.0853	-25.3427	2018-10-29	2018-11-07	FloodList	0	10000	Heavy rain	1	10019.9	29435
4704	std		Vietnam		107.137	11.491	2018-11-24	2018-11-29	FloodList	1	100000	Tropical Storm, Surge	1	6467.41	218916
4711	std		USA		-120.058	35.7787	2018-12-05	2018-12-10	FloodList	0	0	Heavy rain	1.5	2475.92	28821
