# Supplementary material for: Satellite imaging reveals increased proportion of population exposed to floods
Source: Springer Nature journal article supplement (doi:10.1038/s41586-021-03695-w), 2021-08-04
Supplement: MOESM3 [file 41586_2021_3695_MOESM3_ESM.xlsx]

## Sheet: qclist6_20
DFO ID	Country(ies)	Flooding?	Problem?	Product useful?	if "E" no/maybe, why?	Otsu better than standard	notes: Otsu / Standard	Flood downstream? explain	Dates correct?
1585	United States	No	Yes	No	Imagery is not visable, neither are OTSU or STD. Polygon/outlines and the base water amount are visible.
1586	Australia	Yes	No	Yes		Yes	Otsu better	Downstream flooding	Yes
1587	Madagascar	Yes	No	Yes		Yes	Otsu better	Upstream flooding	Yes
1588	Vietnam, Cambodia, Laos	No Imagery	Yes	No	No Imagery-- only corners
1589	Zimbabwe	No	Yes	No	No flood data	No	Neither produced data	N/A	Yes
1590	Australia	Yes	No	Yes		Yes	Otsu better	Downstream flooding	Yes
1591	Argentina	No	Yes	No
1592	Czechia	No	Yes	No	Clouds obscure entire image	No	OTSU not present	No, there is no flood	Yes
1593	South Africa	No	Yes	Maybe	Clouds obscure the DFO polygon only		OTSU not present	No, there is no flood	Yes
1594	United States	Yes	No	Maybe	Clouds in northern portion of DFO polygon	Yes	No Standard	No, The flood is contained within the DFO polygon	Yes
1595	Hungary	Yes	No	Yes		Yes	No Standard	No, The flood is contained within the DFO polygon	Yes
1596	China (southeast)	Yes	Yes	No	Too many clouds	Yes	No Standard	No	Yes
1597	United States	No	Yes	No	Too many clouds	N/A	Niether Present	No, No flood.	Yes
1598	Somalia and Kenya	Yes	No	Yes		Yes	Standard is not present	Yes, the flood continues northeast into kenya outside of the DFO polygon	Yes
1599	Phillipines	Yes	Yes	Yes	Clouds obscure part of the imagery	No	OTSU and Standard are the same	Yes, there is actually minor amounts of flooding within the DFO polygon (possibly because it is obscured by clouds), it is to the south.
1600	Indonesia	no	no	no	no floodings	no	no standard cells/otsu cells		no
1601	Colombia	no	no	no	no floodings	no	no standard cells/otsu cells		yes
1602	Turkey	Yes	No	Yes		Yes	OTSU has a significantly larger area than standard.	Yes, Flooding continues north along the coast and south of Kaman.	Yes
1603	Myanmar	No	Yes	No	Clouds obscure entire image	N/A	Neither present	N/A	Yes
1604	Vietnam	no	yes	no	no floodings	no	no standard cells/otsu cells		yes
1605	China	no	no	no	no floodings	no	no standard cells/otsu cells		no
1606	India	Yes	Yes	No	Clouds obscure the entire image	Yes	Standard in same area as OTSU, just smaller	Flood northwest of DFO polygon	Yes
1607	Chile	yes	no	no	measuring permanent water	no	same size		no
1608	Colombia	no	no	no	measuring permanent water	no	no standard cells/otsu cells		no
1609	Guatemala	yes	no	no	measuring permanent water	yes	slightly bigger than standard cells		yes
1610	China	Yes	No	Yes		Yes	OTSU in same place as standard, just larger	Yes, Flood continues up along the coast	Yes
1611	India, Bangladesh	no	no	no	measuring permanent water	no	no standard cells/otsu cells		no
1612	Japan	no	no	no	measuring permanent water	no	no standard cells/otsu cells		yes
1613	China	no	no	no	measuring permanent water	no	no standard cells/otsu cells		no
1614	Cambodia,Thailand,Vietnam	yes	no	yes	floodings found in city and in a large scale	yes	significantlly more otsu cells		yes
1615	India, Bangladesh	yes	no	no	measuring permanent water	yes	no standard cells		no
1616	India	no	no	no	measuring permanent water	no	no standard cells/otsu cells		no
1617	India	no	no	no	no floods/measuring permanent water	no	no standard cells/otsu cells		yes
1618	Brazil	no	no	no	no floods/measuring permanent water	no	no standard cells/otsu cells		no
1619	Russia	no	no	no	no floods/measuring permanent water	no	no standard cells/otsu cells		no
1620	Cameroon	no	no	no	no floods/measuring permanent water	no	no standard cells/otsu cells		no
1621	Iran	no	yes	no	no floods/measuring permanent water	no	no standard cells/otsu cells		yes
1622	Vietnam, Thailand	no	no	no	no floods/measuring permanent water	no	no standard cells/otsu cells		no
1623	India	no	no	no	no floods/measuring permanent water	no	no standard cells/otsu cells		yes
1624	Ethiopia	no	no	no	no floods/measuring permanent water	no	no standard cells/otsu cells		no
1625	South Korea	no	no	no	no floods/measuring permanent water	no	no standard cells/otsu cells		yes
1626	India	yes	no	no	little floodings on farmlands	yes	no standard cells		yes
1627	China,Russia,South Korea, North Korea	yes	yes	yes	floodings in the city found in South Korea	yes	no standard cells		no
1628	India	no	no	no	no floods/measuring permanent water	no	no standard cells/otsu cells		no
1629	Cambodia	no	no	no	no floods/measuring permanent water	no	no standard cells/otsu cells		no
1630	China	no	no	no	no floods/measuring permanent water	no	no standard cells/otsu cells		no
1631	China	Yes	No	Yes		Yes	Standard in same as the OTSU, just smaller and more scattered	The flood is actually northeast of the DFO polygons	Yes
1632	Phillipines	no	no	no	no floods/measuring permanent water	no	no standard cells/otsu cells		yes
1633	San Salvador	no	no	no	no floods/measuring permanent water	no	no standard cells/otsu cells		no
1634	North Korea	no	no	no	no floods/measuring permanent water	no	no standard cells/otsu cells		no
1635	Japan, South Korea	no	no	no	no floods/measuring permanent water	no	no standard cells/otsu cells		yes
1636	Guatemala	Yes	No	Yes		Yes	Standard not present	Only flood is northeast of the DFO polygon-- one pixel in a lake	Yes
1637	Brazil	no	no	no	no floods/measuring permanent water	no	no standard cells/otsu cells		yes
1638	Sri Lanka	no	no	no	no floods/measuring permanent water	no	no standard cells/otsu cells		yes
1639	France	no	no	no	no floods/measuring permanent water	no	no standard cells/otsu cells		yes
1640	Mexico	no	no	no	no floods/measuring permanent water	no	no standard cells/otsu cells		no
1641	India	yes	no	yes	floods found in cities	yes	significantlly more otsu cells		yes
1642	Nigeria	no	yes	no	no floods/measuring permanent water	no	no standard cells/otsu cells		yes
1643	Mexico, Balize	no	no	no	no floods/measuring permanent water	no	no standard cells/otsu cells		yes
1644	Colombia	no	no	no	no floods/measuring permanent water	no	no standard cells/otsu cells		yes
1645	Vietnam	yes	no	no	not much floodings and	no	no standard cells		yes
1646	United Kingdom	no	no	no	no floods/measuring permanent water	no	no standard cells/otsu cells		no
1647	Mexico	no	no	no	no floods/measuring permanent water	no	no standard cells/otsu cells		no
1648	Brazil	no	no	no	no floods/measuring permanent water	no	no standard cells/otsu cells		yes
1649	China	no	no	no	no floods/measuring permanent water	no	no standard cells/otsu cells		no
1650	Italy	no	no	no	no floods/measuring permanent water	no	no standard cells/otsu cells		no
1651	Spain	no	no	no	no floods/measuring permanent water	no	no standard cells/otsu cells		no
1652	United States	no	yes	no	no floods/measuring permanent water	no	no standard cells/otsu cells		yes
1653	Algeria	no	no	no	no floods/measuring permanent water	no	no standard cells/otsu cells		yes
1654	Israel	no	yes	no	no floods/measuring permanent water	no	no standard cells/otsu cells		no
1655	Phillipines	no	no	no	no floods/measuring permanent water	no	no standard cells/otsu cells		yes
1656	Indonesia	no	no	no	no floods/measuring permanent water	no	no standard cells/otsu cells		yes
1657	United Kingdom	no	no	no	no floods/measuring permanent water	no	no standard cells/otsu cells		no
1658	Taiwan	no	no	no	no floods/measuring permanent water	no	no standard cells/otsu cells		no
1659
1660	Phillipines	yes	no	no	measuring permanent water	no	same size		no
1661	United States	no	no	no	no floods/measuring permanent water	no	no standard cells/otsu cells		no
1662	Italy	no	no	no	no floods/measuring permanent water	no	no standard cells/otsu cells		no
1663	Indonesia	no	no	no	no floods/measuring permanent water	no	no standard cells/otsu cells		no
1664	Canada	no	no	no	no floods/measuring permanent water	no	no standard cells/otsu cells		no
1665	Venezuela	yes	no	no	measuring permanent water	no	same size		no
1666	Saudi Arabia	yes	no	no	measuring permanent water	no	same size		no
1667	Australia	yes	no	no	mostly measuring permanent water, some otsu pixels are found on farmlands	yes	otsu slightly bigger than standard		no
1668	Vietnam	no	no	no	no floods/measuring permanent water	no	no standard cells/otsu cells		no
1669	Sri Lanka	no	no	no	no floods/measuring permanent water	no	no standard cells/otsu cells		yes
1670	South Africa	no	no	no	no floods/measuring permanent water	no	no standard cells/otsu cells		no
1671	Malaysia	yes	no	no	measuring permanent water	yes	no standard cells		yes
1672	Somalia	yes	no	no	measuring permanent water	yes	more dispersed otsu pixels		no
1673	Phillipines	no	no	no	no floods/measuring permanent water	no	no standard cells/otsu cells		no
1674	Iran	no	no	no	no floods/measuring permanent water	no	no standard cells/otsu cells		yes
1675	Tanzania	no	no	no	no floods/measuring permanent water	no	no standard cells/otsu cells		no
1676	Indonesia	no	no	no	no floods/measuring permanent water	no	no standard cells/otsu cells		no
1677	Indonesia	no	no	no	no floods/measuring permanent water	no	no standard cells/otsu cells		yes
1678	Phillipines	no	no	no	no floods/measuring permanent water	no	no standard cells/otsu cells		no
1679	Brazil	yes	no	no	measuring permanent water	no	same size		yes
1680	Australia	yes	no	no	not much floodings /measuring permanent water	yes	otsu slightly bigger than standard		no
1681	Sri Lanka	yes	no	no	not much floodings /measuring permanent water	yes	otsu slightly bigger than standard		yes
1682	Croatia	no	no	no	no floods/measuring permanent water	no	no standard cells/otsu cells		no
1683	Mozambique	yes	no	no	measuring permanent water	no	no otsu cells		no
1684	Malawi	no	yes	no	no pixels within polygon	no	no standard cells/otsu cells		no
1685	Belgium	no	no	no	measuring permanent water	no	no standard cells/otsu cells		no
1686	Kenya	no	no	no	measuring permanent water	no	no standard cells/otsu cells		yes
1687	phillipines	no	yes	no	measuring permanent water	no	no standard cells/otsu cells		yes
1688	Malaysia	no	no	no	measuring permanent water	no	no standard cells/otsu cells		yes
1689	Bolivia	no	no	no	measuring permanent water	no	no standard cells/otsu cells		no
1690	Tanzania	no	yes	no	measuring permanent water	no	no standard cells/otsu cells		no
1691	Portugal	no	no	no	measuring permanent water	no	no standard cells/otsu cells		no
1692	Australia	yes	no	no	floodings found on farmlands	yes	otsu cells slightly bigger than standard		yes
1693	Indonesia	no	no	no	measuring permanent water	no	no standard cells/otsu cells		no
1694	phillipines	yes	no	no	measuring permanent water	yes	no standard cells		yes
1695	Bolivia	no	no	no	measuring permanent water	no	no standard cells/otsu cells		no
1696	Australia	yes	yes	no	only few otsu pixels on map, standards	yes	no standard cells		no
1697	United States	no	yes	no	measuring permanent water		no otsu and standards		no
1698	Tanzania	no	yes	no	measuring permanent water	no	no standard cells/otsu cells		yes
1699	Hungary	yes	no	no	measuring permanent water	no			no
1700	Spain	no	no	no	measuring permanent water	no	no standard cells/otsu cells		no
1701	Malaysia	no	yes	no	measuring permanent water	no	no standard cells/otsu cells		no
1702	Turkey	no	yes	no	measuring permanent water	no	no standard cells/otsu cells		yes
1703	Australia	no	no	no	measuring permanent water	no	no standard cells/otsu cells		yes
1704	Ecuador	no	no	no	measuring permanent water	no	no standard cells/otsu cells		no
1705	Saudi Arabia	no	no	no	measuring permanent water	no	no standard cells/otsu cells		no
1706	France	no	no	no	measuring permanent water	no	no standard cells/otsu cells		yes
1707	Spain	no	no	no	measuring permanent water	no	no standard cells/otsu cells		yes
1708	Peru	yes	no	no	measuring permanent water	no			no
1709	Angola	yes	no	no	measuring permanent water	yes	no standard cells		no
1710	France	no	no	no	measuring permanent water	no	no standard cells/otsu cells		no
1711	Angola	no	no	no	measuring permanent water	no	no standard cells/otsu cells		yes
1712	United States	yes	no	no	measuring permanent water	yes	more otsu cells		no
1713	Peru	no	no	no	measuring permanent water	no	no standard cells/otsu cells		no
1714	Brazil	no	no	no	measuring permanent water	no	no standard cells/otsu cells		no
1715	Poland	no	no	no	measuring permanent water	no	no standard cells/otsu cells		no
1716	Maylasia	yes	yes	no	measuring permanent water	yes	otsu cells found in lakes		no
1717	Belarus	yes	no	no	measuring permanent water	no	no standard cells/otsu cells		no
1718	Brazil, Uruguay	yes	no	no	measuring permanent water	no	no standard cells/otsu cells		no
1719	Russian	yes	no	no	measuring permanent water	no			no
1720	Thailand	yes	no	no	not much floodings	yes	no standard cells		no
1721	Iran	no	yes	no	measuring permanent water	no	no standard cells/otsu cells		no
1722	Turkey	no	yes	no	measuring permanent water	no	no standard cells/otsu cells		no
1723	Puerto Rico	no	yes	no	measuring permanent water	no	no standard cells/otsu cells		yes
1724	Colombia	no	no	no	measuring permanent water	no	no standard cells/otsu cells		yes
1725
1726	Vietnam	no	no	no	measuring permanent water	no	no standard cells/otsu cells		yes
1727	Haiti	yes	no	no	measuring permanent water	no	same size		no
1728	Republic of the Congo, Democratic Republic of the Congo	no	yes	no	measuring permanent water	no	no standard cells/otsu cells		no
1729	United States	yes	no	no	floodings on farmland	no	standard cells slightly bigger		Error generating chart
1730	El Salvador	no	no	no	no pixels	no	no standard cells/otsu cells		no
1731	Bangladesh	no	no	no	measuring permanent water	no	no standard cells/otsu cells		no
1732	China	no	no	no	measuring permanent water	no	no standard cells/otsu cells		yes
1733	United States	yes	no	no	not much floodings	yes	otsu are found in the city		yes
1734	Ecuador	no	no	no	measuring permanent water	no	no standard cells/otsu cells		yes
1742	Vietnam	no	no	no	measuring permanent water	no	no standard cells/otsu cells		no
1743	China,Phillipines	no	no	no	measuring permanent water	no	no standard cells/otsu cells		no
1744	India	no	no	no	measuring permanent water	no	no standard cells/otsu cells		no
1746	US	no	yes	no	No flood pixels	no otsu present	no standard pixels	other	Yes
1747	India	Yes	no	Yes	some floodings	yes	no standard pixels	no - random pattern	Yes
1748	Poland	no	yes	no	No flood Pixels	no otsu present	no standard pixels	other	no
1749	China	no	yes	no	no flood Pixels	no otsu present	no standard pixels		No
1750	Cot D'Ivoire
1751	Taiwan	yes	yes	no	no standard data and thick clouds	yes	no standard data		yes
1752	South Korea	no
1753	India	no
1754	United States	no	yes	no	no otsu and standard	yes	no otsu and standard		yes
1755	Iran	no	yes	no	no otsu and standard	yes	no otsu and standard		yes
1756	Nicaragua	no	yes	no	no otsu and standard	yes	no otsu and standard		no
1757	Pakistan	yes	yes	no	no standard data and thick clouds	yes	no standard data		yes
1758	Poland	yes	no			yes	otsu better		yes
1759	China	no	yes	no	no data in DFO				yes
1760	Yemen	no	yes	no	DFO small, has no data	no			no
1761	United States	no	yes	no	No flood in DFO	no			no
1762	Taiwan	no	yes	no	No flood in DFO	no otsu present			yes
1763	South Korea	no	yes	no	No flood in DFO	no otsu present			yes
1764	Nepal	no	yes	no	No flood pixels	no otsu present	no standard pixels		yes
1765	Indonesia	no	yes	no	No flood pixels	no otsu present	no standard pixels		yes
1766	Bangladesh, Bhutan	yes	yes	no	No flood in DFO	yes			no
1767	Indonesia	no	yes	no	No flood pixels	no otsu present	no standard pixels		no
1768	Nigeria	no	yes	no	No flood pixels	no otsu present	no standard pixels		no
1769	US	NO	yes	no	No flood pixels	no otsu present	no standard pixels		no
1770	North Korea	yes	no	maybe	some flooding on coast	yes	otsu larger than standard	other	no
1771	Yemen	no	yes	no	no flooding	no otsu present			no
1772	Sudan, Ethiopia	yes	no	yes	good flooding along rivers	yes	otsu larger than standard	yes	no
1773	Russia	yes	no	no	very little flooding	no	otsu smaller than standard	no - looks more like a reservoir or lake	yes
1774	Afghanistan	no	yes	no	no flooding	no otsu present			no
1775	Iran	no	yes	no	no flooding	no otsu present			no
1776	Thailand	no	yes	no	no flooding	no otsu present			no
1777	Philippines	no	yes	no	no flooding	no otsu present			yes
1778	Chad	yes	no	yes	some flooding along a river	yes	otsu bigger than standard	yes	yes
1779	India	no	yes	no	no flooding	no otsu present			no
1780	Pakistan	no	yes	no	no flooding	no otsu present			no
1781	Cambodia, Vietnam	yes	no	yes	good flood	no	about the same	yes	yes
1782	South Africa	yes	no	no	very little flooding	yes	only otsu detected flooding in this polygon		yes
1783	Vietnam	no	yes	no	no flooding	no otsu present			no
1784	China	no	yes	no	no flooding	no otsu present			no
1785	Democratic Republic of the Congo, Uganda	no	yes	no	no flooding	no otsu present			no
1786	Nigeria	yes	no	no	very little flooding	yes	only otsu detected flooding in this polygon		no
1787	China	no	yes	no	no flooding	no otsu present			yes
1788	Nepal	no	yes	no	no flooding	no otsu present			yes
1789	India	yes	no	yes	some flooding along a river	yes	only otsu detected flooding in this polygon	yes	yes
1790	Brazil	no	yes	no	no flooding	no otsu present			no
1791	India	yes	no	yes	flooding along rivers	yes	otsu picked up cells that standard did not	yes	no
1792	Thailand	no	yes	no	no flooding	no otsu present			yes
1793	Mali, Guinea	yes	no	yes	lots of flooding along rivers	yes	otsu picked up cells that standard did not	yes	yes
1794	Italy	no	yes	no	no flooding	no otsu present			yes
1795	Taiwan	no	yes	no	no flooding	no otsu present			yes
1796	Mexico	yes	no	no	very little flooding	yes	otsu picked up cells that standard did not	no - looks more like a reservoir or lake	no
1797	China	no	yes	no	no flooding	no otsu present			no
1798	Iran	no	yes	no	no flooding	no otsu present			no
1799	Mexico	yes	no	no	not much flooding mapped	no	little difference		no
1800	Philippines	no	yes	no	no flooding	no otsu present			yes
1801	Rwanda	no	yes	no	no flooding	no otsu present			yes
1802	Brazil	yes	no	maybe	cloudy but some flooding detected	yes	otsu picked up cells that standard did not	yes	yes
1803	India	no	yes	no	no flooding	no otsu present			no
1804	Iran	no	yes	no	no flooding	no otsu present			yes
1805	Nepal	no	yes	no	no flooding	no otsu present			yes
1806	France	no	yes	no	no flooding	no otsu present			no
1807	Indonesia	no	yes	no	no flooding	no otsu present			no
1808	Philippines	no	yes	no	no flooding	no otsu present			yes
1809	North Korea	yes	no	no	very little flooding	yes	otsu picked up cells that standard did not	no - random pattern	yes
1810	Argentina	yes	yes	yes	good flooding	no otsu present			yes
1811	India	yes	no	no	cloudy and not much flooding	yes	otsu picked up cells that standard did not	no - random pattern	no
1812	United States	yes	no	maybe	some flooding but not much	yes	otsu picked up cells that standard did not	yes	no
1813	Bangladesh	yes	no	no	very little flooding	yes	otsu picked up cells that standard did not	no - random pattern	yes
1814	France	no	yes	no	no flooding	no otsu present			yes
1815	Vietnam	no	yes	no	no flooding	no otsu present			yes
1816	United Kingdom	no	yes	no	no flooding	no otsu present			no
1817	Indonesia	no	yes	no	no flooding	no otsu present			yes
1818	Cuba	yes	no	yes	good flooding	yes	otsu larger than standard	no - looks more like a reservoir or lake	yes
1819	Rwanda	no	yes	no	no flooding	no otsu present			no
1820	Somalia	yes	no	yes	some scattered flooding	yes	otsu picked up cells that standard did not	no - random pattern	yes
1821	Malaysia	no	yes	no	no flooding	no otsu present			yes
1822	Philippines	no	yes	no	no flooding	no otsu present			yes
1823	Puerto Rico	yes	no	no	little flooding detected	no	little difference		yes
1824	Algeria	no	yes	no	no flooding	no otsu present			yes
1825	United States	no	yes	no	no flooding	no otsu present			yes
1826	Uganda	no	yes	no	no flooding	no otsu present			no
1827	Philippines	no	yes	no	no flooding	no otsu present			no
1828	Brazil	yes	yes	no	very little flooding	yes	otsu picked up cells that standard did not		no
1829	United States	yes	no	yes	good flooding along rivers	no	about the same	yes	yes
1830	Turkey	yes	no	no	no flooding	no otsu present			yes
1831	Turkey	no	yes	no	no flooding	no otsu present			yes
1832	Malaysia	no	yes	no	no flooding	no otsu present			no
1833	Iran	no	yes	no	no flooding	no otsu present			no
1834	Philippines	no	yes	no	no flooding	no otsu present			yes
1835	South Africa	no	yes	no	no flooding	no otsu present			no
1836	Colombia	no	yes	no	no flooding	no otsu present			yes
1837	Mozambique	no	yes	no	no flooding	no otsu present			no
1838	Turkey, Greece	no	yes	no	no flooding	no otsu present			yes
1839	Zimbabwe	yes	no	no	very little flooding	no otsu present			no
1840	United States	yes	no	yes	lots of flooding along rivers	yes			no
1841	Democratic Republic of the Congo	yes	no	no	very little flooding	no	otsu smaller	no - looks more like a reservoir or lake	no
1842	Malaysia	no	yes	no	no flooding	no otsu present			no
1843	South Africa	no	yes	no	no flooding	no otsu present			yes
1844	Malaysia	no	yes	no	no flooding	no otsu present			yes
1845	Morocco	no	yes	no	no flooding	no otsu present			yes
1846	Brazil	no	yes	no	no flooding	no otsu present			no
1847	Thailand	no	yes	no	no flooding	no otsu present			no
1848	Peru	no	yes	no	no flooding	no otsu present			no
1849	Turkey	no	yes	no	no flooding	no otsu present			yes
1850	Syria	no	yes	no	no flooding	no otsu present			no
1851	Indonesia	no	yes	no	no flooding	no otsu present			yes
1852	France, Germany	no	yes	no	no flooding	no otsu present			yes
1853	China	no	yes	no	no flooding	no otsu present			no
1854	Malawi	no	yes	no	no flooding	no otsu present			yes
1855	Hungary, Romania, Ukraine	no	yes	no	no flooding	no otsu present			no
1856	Indonesia	no	yes	no	no flooding	no otsu present			no
1857	Brazil	no	yes	no	no flooding	no otsu present			no
1858	Philippines	no	yes	no	no flooding	no otsu present			no
1859	Indonesia	no	yes	no	no flooding	no otsu present			yes
1860	Indonesia	no	yes	no	no flooding	no otsu present			yes
1861	Ghana	no	yes	no	no flooding	no otsu present			no
1862	Russia	no	yes	no	no flooding	no otsu present			no
1863	Iran	yes	no	maybe	cloudy but some flooding detected	yes	otsu picked up cells that standard did not		yes
1864	Indonesia	no	yes	no	no flooding	no otsu present			no
1865	Indonesia	no	yes	no	no flooding	no otsu present			yes
1866	Senegal	no	yes	no	no flooding	no otsu present			yes
1867	United States	yes	no	no	not much flooding mapped	no	little difference	yes	yes
1868
1869	Lithuania	no	yes	no	no flooding	no otsu present			no
1870	Indonesia	no	yes	no	no flooding	no otsu present			no
1871	India	no	yes	no	no flooding	no otsu present			no
1872	Brazil	no	yes	no	no flooding	no otsu present			no
1873	Peru	no	yes	no	no flooding	no otsu present			no
1874	Australia	no	yes	no	no flooding	no otsu present			yes
1875	Democratic Republic of the Congo	no	yes	no	no flooding	no otsu present			no
1876	United Kingdom	no	yes	no	no flooding	no otsu present			yes
1877	Australia	no	yes	no	no flooding	no otsu present			yes
1878	New Zealand	no	yes	no	no flooding	no otsu present			yes
1879	Indonesia	no	yes	no	no flooding	no otsu present			no
1880	Georgia	no	yes	no	no flooding	no otsu present			no
1881	Australia	no	yes	no	no flooding	no otsu present			no
1882	Indonesia	no	yes	no	no flooding	no otsu present			no
1883	Uzbekistan	no	yes	no	no flooding	no otsu present			no
1884	Bolivia	no	yes	no	no flooding	no otsu present			no
1885	Brazil	yes	no	yes	good flood	yes	otsu picked up cells that standard did not	yes	yes
1886	Australia	yes	no	no	very small flooding	no	almost no difference	no - random pattern	no
1887	Fiji	no	yes	no	no flooding	no otsu present			yes
1888	Russia	no	yes	no	no flooding	no otsu present			no
1889	Afghanistan	no	yes	no	no flooding	no otsu present			no
1890	Ecuador	no	yes	no	no flooding	no otsu present			yes
1891	Egypt	yes	yes	no	no flooding	yes	otsu picked up cells that standard did not	other	no
1892	China	no	yes	no	no flooding	no otsu present			no
1893	United States	no	yes	no	no flooding	no otsu present			yes
1894	Mozambique	no	yes	no	no flooding	no otsu present			yes
1895	Austria	yes	no	no	very little flooding, possibly only over permanent water	no	otsu smaller	yes	yes
1896	Philippines	no	yes	no	no flooding detected	no otsu present			yes
1897	Indonesia	no	yes	no	no flooding detected	no otsu present			no
1898	Peru	yes	no	no	very little flooding, possibly only over permanent water	no	very little difference	no - looks more like a reservoir or lake	yes
1899	Tajikistan	no	yes	no	no flooding	no otsu present			no
1900	Canary Islands	no	yes	no	no flooding	no otsu present			yes
1901	Afghanistan	no	yes	no	no flooding	no otsu present			yes
1902	Saudi Arabia	yes	yes	no	no inland flooding	yes	detects water on the coast that standard does not	other	yes
1903	Iran	no	yes	no	no flooding	no otsu present			no
1904	United States	yes	no	no	very little flooding detected	no	otsu smaller than standard	no - looks more like a reservoir or lake	yes
1905	Indonesia	no	yes	no	no flooding	no otsu present			no
1906	Indonesia	no	yes	no	no flooding	no otsu present			no
1907	Ethiopia	yes	yes	yes	decent flooding around a lake	yes	otsu picks up flooding that standard does not	no - looks more like a reservoir or lake	yes
1908	Bangladesh	yes	no	yes	decent flooding but cloudy	yes	otsu picks up flooding that standard does not	no - random pattern	yes
1909	Afghanistan	no	yes	no	no flooding	no otsu present			no
1910	Russia	yes	no	yes	lots of flooding	no	otsu smaller than standard	yes	no
1911	United States	no	yes	no	no flooding	no otsu present			no
1912	Colombia	yes	no	maybe	very cloudy but decent amount of flooding	no otsu present			no
1913	Russia	yes	no	no	very little flooding detected	no otsu present			no
1914	Iran	no	yes	no	no flooding	no otsu present			yes
1915	Kenya	no	yes	no	no flooding	no otsu present			no
1916	United States	no	yes	no	no flooding	no otsu present			yes
1917	Democratic Republic of Congo, Uganda, Kenya, Tanzania	yes	no	yes	good flooding	no	otsu smaller than standard	no - looks more like a reservoir or lake	yes
1918	Costa Rica	no	yes	no	no flooding	no otsu present			yes
1919	United States	yes	no	yes	good flooding along rivers	no	about the same	yes	yes
1920	Alaska	no	yes	no	no flooding	no otsu present			yes
1921	Russia	yes	no	yes	good flooding detected despite being cloudy	no	about the same size	yes	yes
1922	Madagascar	no	yes	no	no flooding	no otsu present			yes
1923	Oman	no	yes	no	no flooding	no otsu present			yes
1924	Vietnam	no	yes	no	no flooding	no otsu present			yes
1925	Paraguay	yes	no	yes	good flooding	yes	otsu picks up flooding that standard does not	yes	yes
1926	Afghanistan	no	yes	no	no flooding	no otsu present			no
1927	United States	no	yes	no	no flooding	no otsu present			yes
1928	Honduras, Nicaragua	yes	no	no	cloudy and very little flooding detected	yes	otsu picks up flooding that standard does not	no - random pattern	no
1929	China	no	yes	no	no flooding	no otsu present			yes
1930	Bangladesh	no	yes	no	no flooding	no otsu present			no
1931	Russia	yes	no	yes	good flooding along rivers	no	little difference	yes	yes
1932	Chile	yes	yes	no	almost no flooding mapped	yes	otsu picks up handful of cells that standard does not	no - random pattern	yes
1933	Russia	yes	no	no	almost no flooding mapped	no	little difference	yes	no
1934	Bulgaria	no	yes	no	no flooding within polygon	no otsu present			no
1935	United States	no	yes	no	no flooding within polygon	no otsu present			no
1936	Colombia	no	yes	no	no flooding within polygon	no otsu present			no
1937	United States	yes	no	no	very little flooding detected	yes	otsu picks up flooding that standard does not	yes	yes
1938	Syria	yes	no	yes	decent flooding for size of polygon	yes	otsu picks up flooding that standard does not	no - random pattern	yes
1939	Uruguay	yes	no	yes	good flooding along rivers	no	little difference	yes	yes
1940	China	yes	no	no	little flooding within polygons	yes	little difference	no - looks more like a reservoir or lake	yes
1941	Honduras	no	yes	no	no flooding within polygon	no otsu present			yes
1942	France, Switzerland, Germany, Austria, Italy	no	yes	no	no flooding	no otsu present			no
1943	United States	yes	no	yes	good flooding	no	little difference	no - looks more like a reservoir or lake	yes
1944	China	yes	no	maybe	some flooding on rivers	yes	otsu picks up flooding that standard does not	yes	yes
1945	Vietnam	no	yes	no	no flooding	no otsu present			yes
1946	Russia	yes	no	maybe	some flooding	no	about the same		no
1947	Ghana	no	yes	no	no flooding	no otsu present			yes
1948	Jamaica	no	yes	no	no flooding	no otsu present			no
1949	Russia	no	yes	no	no flooding	no otsu present			yes
1950	United States	no	yes	no	no flooding	no otsu present			no
1951	Cuba	yes	no	yes	some flooding around a lake or reservoir	yes	otsu picks up flooding that standard does not	no - looks more like a reservoir or lake	yes
1952	India	yes	yes	no	very little flooding detected	yes	otsu picks up flooding that standard does not	yes	no
1953	Tajikistan	no	yes	no	no flooding	no otsu present			no
1954	China	no	yes	no	no flooding	no otsu present			yes
1955	China	yes	no	no	little flooding within polygons	yes	otsu picks up flooding that standard does not	yes	yes
1956	Brazil	no	yes	no	no flooding	no otsu present			no
1957	Romania	yes	no	no	very little flooding detected	yes	otsu picks up flooding that standard does not	yes	yes
1958	China	yes	no	no	very little flooding detected	yes	otsu picks up flooding that standard does not	no - random pattern	yes
1959	China	no	yes	no	no flooding	no otsu present			yes
1960	India	yes	no	maybe	some flooding but very cloudy	yes	otsu picks up flooding that standard does not	yes	yes
1961	New Zealand	no	yes	no	no flooding	no otsu present			no
1962	Russia	yes	no	yes	some good flooding on lakes or reservoirs	no	little difference	no - looks more like a reservoir or lake	no
1963	Canada	no	yes	no	no flooding	no otsu present			yes
1964	China	no	yes	no	no flooding	no otsu present			yes
1965	Ireland	no	yes	no	no flooding	no otsu present			no
1966	Vietnam	no	yes	no	no flooding	no otsu present			no
1967	India	no	yes	no	no flooding	no otsu present			no
1968	Philippines	no	yes	no	no flooding	no otsu present			no
1969	India	yes	no	maybe	very cloudy but decent amount of flooding	yes	otsu picks up flooding that standard does not	other	yes
1970	Georgia	yes	no	no	very little flooding detected	no	very little difference	no - looks more like a reservoir or lake	no
1971	China	yes	yes	yes	good flood	yes	otsu picks up flooding that standard does not	yes	yes
1972	United States	yes	yes	yes	good flooding	yes	otsu picks up flooding that standard does not	no - random pattern	yes
1973	China	yes	no	no	cloudy and little flooding detected	yes	otsu picks up flooding that standard does not	no - random pattern	yes
1974	India, Bangladesh	yes	yes	yes	large flood	no otsu present			yes
1975	China	yes	yes	no	cloudy and little flooding detected	yes	otsu picks up flooding that standard does not	no - random pattern	no
1976	South Korea	no	yes	no	no flooding within polygon	yes	otsu picks up flooding outside polygon that standard does not	other	no
1977	Colombia, Venezuela	yes	yes	yes	good flooding	yes	otsu picks up flooding that standard does not	yes	no
1978	Yemen	no	yes	no	no flooding within polygon	no otsu present			no
1979	United States	yes	yes	yes	some flooding	yes	otsu picks up flooding that standard does not	no - random pattern	no
1980	Nepal	yes	yes	yes	good flooding	yes	otsu picks up flooding that standard does not	yes	yes
1981	Philippines	yes	no	yes	good flooding	yes	otsu picks up flooding that standard does not	no - random pattern	yes
1982	Greece	no	yes	no	no flooding within polygon	no otsu present			no
1983	Japan	yes	yes	no	very little flooding detected	yes	otsu picks up flooding that standard does not	yes	yes
1984	Russia	yes	no	no	little flooding	no	otsu slightly smaller	yes	yes
1985	New Zealand	yes	no	yes	flooding along rivers	no	little difference	yes	no
1986	Spain	no	yes	no	no flooding within polygon	yes	otsu picks up flooding outside polygon that standard does not	other	yes
1987	Guatemala	yes	no	no	little flooding	yes	otsu picks up flooding that standard does not	yes	no
1988	Czechia	yes	no	no	very little flooding detected	yes	otsu picks up flooding that standard does not	no - random pattern	no
1989	Mongolia	yes	no	no	very little flooding detected	no	little difference	no - random pattern	no
1990	Nepal	no	no	no	no flooding within polygon	no otsu present			no
1991	Vietnam	yes	yes	yes	lots of flooding	no otsu present			yes
1992	South Africa	no	To clouded, flood occurs at permanent water outside polygons	no		Yes, somewhat	Within error	No	Extent end date by 7days to overcome clouds
1993	Iran	No	Yes	No	No Flood Data	No	No difference	No	Yes
1994	Slovakia	Yes	No	No	Only a couple of pixles	No	Otsu only mapped permanent water	No	Yes
1995	Romania	Yes	No	Yes		No	Otsu better	No, random flooding	Yes
1996	Venezuela	yes	no	yes		yes	standard seems to be more conservative compared to otsu method	Yes, flooding is seen in other areas as well, including downstream but captured by watershed masks	yes
1997	Russia	Yes	No	Yes		Yes	Otsu better	downstream flooding	Yes
1998	Philippines	yes	no	yes		yes, somewhat	standard seems to be more conservative compared to otsu method	no	yes
1999	Nepal	Yes	No	Yes		Yes	Otsu better	Both	Yes
2000	Turkey	no	no	no	Not sure, just doesn't show	yes		no	yes
2001	Alaska (USA)	no	yes	no	My guess, urban flooding	somewhat		no	yes
2002	Iran	no	no	no	no idea	no		no	yes
2003	Nigeria	no	no	no	My guess, urban flooding	no		no	yes
2004	Yemen	no	no	no	My guess, urban flooding	no		no	yes
2005	China	yes	no	maybe	Not sure, just doesn't show inside DFO polygon. Some flooding outside DFO polygon	yes	I think Otsu gets an larger area than really water detected	no	yes
2006	USA	no	yes	no	Clouds maybe. Some flooding is reported with Otsu but looks more like overestimation	Yes, significant	This Otsu should be a bit more conservative	no	Yes
2007	Alaska (USA)	maybe	yes	yes	Only when using Otsu	Yes, significant	Hard to say, might be overestimating	yes	Think so but rain chart gives error (no properties to chart).
2008	Afghanistan	no	don't know, polygon wrong? maybe end date increasing with a week?	no		no		no	Rain event seems to be still going on, maybe extend it by 7days
2009	South Africa	yes		yes		Yes, somewhat	Hard to say	no, looks like urban flooding, no river close by	yes
2010	Bulgaria	no	Too much urban area?	no		Yes, somewhat but only mapping permanent water	Within error	no	Rain event seems to be still going on, maybe extend it by 7days
2011	United Kingdom	no	Too much urban area?	no		no		no	Rain event seems to be still going on, maybe extend it by 7days
2012	Romania	no	Too much urban area?	no		Somewhat	Within error	no	Rain event seems to be still going on, maybe extend it by 7days
2013	Germany	no	Don't know, maybe clouds?	no		no		no, but water is detected outside polygons, mostly permanent water though	yes
2014	Vietnam	no	Not sure	no		yes, somewhat	looks like within error	no	Rain event seems to be still going on, maybe extend it by 7days
2015	Russia	no	Maybe clouds for some areas	no		no		no	yes
2016	China	maybe	yes	maybe	Some pixels do show flooding, very close to the coast though. Cloudy though	yes	Maybe overestimation, hard to say	no	yes
2017	Pakistan	no	yes	no	Looks like there was no flooding	no	Maybe trouble with picking up sediment rich water?	no	Rain event seems to be still going on, maybe extend it by 7days
2018	China	no	Mostly clouded	no		no		no	yes
2019	China	yes	Image mostly clouded, but did detect water	yes		Yes, only Otsu picks up water	Not sure, only Otsu detected water, looks like mostly permanent water but some areas are flooded	no	yes
2020	North Korea, South Korea	no	Clouds	no		no		no	yes
2021	Romania	no	Maybe clouds for some areas	no		no		no	Rain event seems to be still going on, maybe extend it by 7days
2022	Tajikistan	no	Too low resolution (250m)	no		no		no	Rain event seems to be still going on, maybe extend it by 7days
2023	China	yes		yes		yes, but looks ok.	picks actually part of river up that standard algorithm doesn't do	yes, flooding can be seen over a larger area, also upstream so make sure to capture this. Upstream the Otsu algorithm doesn't seem to hold anymore, too many false positives (standard is better in that case)	yes
2024	Germany, Austria, Czechia	yes		yes		slightly	Otsu seems fine in this case	Somewhat, flood is captured by 99% though	yes
2025	Russia	no	probably vegetation	no		no		no	yes
2026	United Kingdom	no	clouds	no		no		no	Rain event seems to be still going on, maybe extend it by 7days
2027	India	no	clouds	no		Not in DFO polygon, yes to the east (other drainage basin)		no	yes
2028	China	no	Urban area + clouds	no		no		no	yes
2029	Iran	yes	West of DFO polygon	yes		Somewhat	Use Otsu	no	yes
2030	Philippines	no	clouds	no		no		no	yes
2031	China	no	probably clouds	no		no		no	yes
2032	Mexico	no	not sure	no		not in DFO polygon	Otsu somewhat bigger	no	yes
2033	South Africa	no	Clouds	no		Somewhat		no	Rain event seems to be still going on, maybe extend it by 7days
2034	China	no	Clouds	no		not in DFO polygons	Otsu shows larger extent downstream, maybe too large?	yes	yes
2035	Vietnam	yes		yes		yes	Not sure if Otsu is over predicting extent	yes, take this into account	yes
2036	China	no	not sure	no		no		no	yes
2037	Thailand, Myanmar	not in DFO polygon	Maybe polygon wrong?, flooding shown east and west of polygon	maybe		yes, also false positives due to mountain shadow in the north	Otsu overpredicts	yes	yes
2038	Algeria	yes, but looks like lakes that fill up		maybe		no		no	yes
2039	Cambodia, Thailand	yes	OTSU doesn't load	yes		no, otsu doesn't load	Otsu doesn't load	yes, take this into account	yes
2040	Pakistan	Yes, but questionable	Not sure if real flooding is detected. Could also be shadows	maybe		yes	Otsu might over estimate	no	yes
2041	Myanmar	yes		yes		yes	Ostu might over estimate but standard shows also flooding	yes	yes
2042	Chile	yes		yes		no	Standard shows larger area flooded	no	yes
2043	Vietnam	maybe	flooding shows on south edge of DFO polygon	maybe		yes	Ostu might over estimate but standard shows also flooding	no	yes
2044	Sierra Leone	no	Clouds?	no		no		no	yes
2045	Vietnam	yes		yes		yes	Ostu might over estimate but standard shows also flooding	no	yes
2046	Russia	yes		yes		yes	Ostu might over estimate but standard shows also flooding	not but upstream (north) it does, take this into account	yes
2047	Guatemala	no	Urban area in 1 part, coastal area doesn't show any flooding, not sure why not	no		no		no	yes
2048	Greece	no	Urban area	no		no		no	yes
2049	India	yes		yes		yes		no, seems to be coastal flooding	yes
2050	Italy	no	flooding event was too small	no		no		no	yes
2051	Yemen	no	No idea	no		no		no	yes
2052	France	yes		yes		Otsu bigger	Hard to say which technique is presenting the flooding best	no	yes
2053	New Zealand	no	Clouds or maybe flashflood?	no		no		no	yes
2054	Mexico	no	Urban area maybe	no		no		no	yes
2055	Kenya	no	Clouds	no		yes, also false positives just outside DFO polygon	False positives outside DFO polygon due to over estimation of Otsu	no	yes
2056	USA, Texas	yes		yes		Yes	Hard to say which technique is presenting the flooding best	no, is coastal area already	yes
2057	USA	no	not sure, 2 out of 4 dfo polygons in clouds, other 2 fine though but no flooding	no		Ostu is bigger, seems to catch more false positives		no	yes
2058	Cuba, Mexico	no	clouds & maybe vegetation	no		no		no	yes
2059	Laos, Vietnam	no	clouds	yes	west of DFO polygon (not in polygon)	yes	not sure which is best	no	yes
2060	Albania	yes	yes	yes	only in north part of DFO polygon	no, otsu doesn't show (but loads)		no	yes
2061	Thailand	yes	OTSU doesn't load	yes		OTSU doesn't load	OTSU doesn't load	no	yes
2062	Bulgaria	no	Maybe clouds?	no		no		no	yes
2063	USA	yes		yes		just a bit	use Otsu	no	yes
2064	USA, Cuba	yes	not sure	yes	Only for Cuba though	yes		no	yes
2065	Algeria	no	clouds	no		no		no	yes
2066	USA	yes	maybe some clouds	yes		yes	Probably use Otsu	yes, include area outside DFO polygon	yes
2067	USA, Mexico	yes	maybe upland, flooding detected at the coast	maybe		yes, somewhat		no	yes
2068	Macedonia	no	clouds	no		no		no	yes
2069	India	no, not in DFO polygon	clouds	no		yes		no	yes
2070	Argentina	yes		yes		yes		yes, and more south than the river	yes
2071	Romania	no	clouds	no		no		no	yes
2072	Malaysia	no	probably urban flooding	no		no		no	Rain event seems to be still going on, maybe extend it by 7days
2073	Argentina, Uruguay	yes		yes		no		no	yes
2074	United Kingdom	no	clouds	no		yes		no	yes
2075	USA, Alaska	yes		yes		yes	looks like Otsu is usable here	no	yes
2076	USA	yes	only some flooding so maybe clouds	yes		yes		no	yes
2077	Vietnam	yes		yes		yes		no	yes
2078	Kenya	no	Not sure but looks like Otsu catches cloud shadows	no		yes	Looks like Otsu find cloud shadows	no	yes
2079	China	yes	captured mostly downstream	yes		yes	Probably use Otsu	Yes, extent area downstream	yes
2080	Colombia	no	clouds	no		yes		no, but lakes and rivers are clearly visable	yes
2081	India	yes	Very little captured with standard method, Otsu maybe captures too much?	no		yes	looks like Otsu is over estimating	no	yes
2082	Vietnam	no	clouds	no		yes, somewhat		no	yes
2083	Many of the Atlantic islands, Barbados etc	yes, although mostly coastal flooding	Could be that coastal flooding is due to differences in vector line to cut off ocean..... so not sure if this is real flooding	no		yes	Looks like Otsu is over estimating	no	yes
2084	Peru	no	clouds	no		yes		yes, but looks like Otsu is over estimating floods	yes
2085	United Kingdom	yes	low sun angle probably but not sure. Lots of clouds as well	maybe		yes		no	yes
2086	Canada	no	clouds	no		no		no	yes
2087	France	no	clouds or flash flooding	no		yes		no	yes
2088	Kenya	no	not sure	no		yes	Otsu gets the right water extent but not much flooding going on	no	Rain event seems to be still going on, maybe extend it by 7days
2089	Republic of the Congo	no	Water detected but those are rivers, not flooding. Could be clouds but MODIS doesn't load so not sure	no		yes, for rivers	Otsu gets the rivers right	no	yes
2090	New Zealand	yes		yes		yes	Both capture flooding in the north east of the DFO polygon, thing Otsu gets it right though	no	yes
2091	USA, Alaska	no	Otsu gets lots of flooding but that is due to low sun angle. Clouds maybe	no		yes, low sun angle	Otsu doesn't get it right	no	yes
2092	Uganda, Kenya	no	My guess, urban flooding	no		no		no	yes
2093	Somalia	yes, but looks like noise	not sure	no		yes	Ostu gives a lot of false positives it looks like, but not sure	no	yes
2094	Costa Rica, Panama	no	clouds, forest	no		no		no	yes
2095	Indonesia	no	clouds, forest	no		no		no	yes
2096	USA, Alaska	yes, but looks like noise	November, low sun angle but both standard and Otsu pick up some flooding, looks very scattered though	no		yes		no	yes
2097	Morocco	yes		yes		no, Otsu is somewhat smaller....	Otsu smaller extent than standard	no	yes
2098	Malaysia	no	clouds, urban flooding	no		no		no	yes
2099	Italy	yes		yes		no		no	yes
2100	Macedonia	no	clouds	no		no		no	yes
2101	Brazil	no	clouds	no		yes		no	yes
2102	Indonesia	maybe	could be false positives	maybe		yes		no	Rain event seems to be still going on, maybe extend it by 7days
2103	France	yes		yes		no		no	yes
2104	USA	yes		yes		no		no	yes
2105	Sri Lanka	very little	clouds	no		yes		no	yes
2106	Indonesia	yes	somewhat cloudy	yes		yes	Otsu seems bigger, use Otsu though	no	yes
2107	Lebanon	no	clouds	no		no		no	yes
2108	Kenya	no	urban area	no		no		no	yes
2109	South Africa	no	not sure	no		yes		no	yes
2110	Angola	no	urban area	no		yes		no	yes
2111	Indonesia	no	clouds	no		yes		no	yes
2112	Malaysia	no	clouds	no		no		no	yes
2113	USA	no	yes	no	Clouds. Not in DFO polygon flooding, unless flooding in the east of polygon is real	no		no	yes
2114	Vanuatu	no	clouds & vegetation	no		no		no	yes
2115	USA	yes		yes		no		no	yes
2116	United Kingdom	yes	clouds	yes		yes at some spots, but standard is also larger at other points		no	yes
2117	Germany, Belgium, Netherlands, France	yes		yes		no		no	yes
2118	Kenya	no	urban area	no		no		no	yes
2119	Malawi, Mozambique	yes		yes		no		no	yes
2120	Bolivia	yes	Clouds	yes		yes	Not sure but Otsu might over estimate	no	yes
2121	USA, Alaska	no	Otsu over estimates significant	no		yes, Otsu is totally off	Otsu over estimates way too much (low sun angle)	no	yes
2122	Macedonia	maybe	Otsu doesn't see flooding within DFO polygon	no		no	Standard captured some flooding but very small, but could be the flooding	no	yes
2123	New Zealand	no	clouds	no		yes		no	yes
2124	Brazil	no	clouds	no		yes		no	yes
2125	Malaysia	no	clouds	no		yes		no	yes
2126	Fiji	no	not sure	no		yes		no	yes
2127	Indonesia	yes	scattered flooding, maybe false positives	yes, probably but not 100% sure. The upper DFO polygon shows flooding well I think, but the one more to the south is more scattered flooding, false positives maybe		yes		no	yes
2128	Afghanistan, Uzbekistan	no	clouds	no		yes		no	yes
2129	Tunisia	no	could be clouds	no		yes		no	yes
2130	Argentina	yes		yes		yes		yes, include area outside DFO polygon	yes
2131	Brazil	no	clouds	no		no		no	yes
2132	Bolivia	no	urban flooding	no		no		no	yes
2133	Madagascar	yes	Unsure, not sure if flooding is real	not sure		Yes	Otsu gives larger extent but lots of scatter pixels as well so not sure if this is real flooding	no	yes
2134	Malaysia	yes		yes, use Otsu		yes, but use Otsu	Use Otsu	no	yes
2135	Israel	no	clouds, urban area	no		yes		no	yes
2136	United Kingdom	yes		yes think so		yes		no	yes
2137	Australia	yes		yes		yes	Otsu is way larger than standard, recommend to use standard I think	no	yes
2138	Peru	yes		yes		yes	Use Otsu	no	yes
2139	Tunisia	no	clouds	no		no		no	yes
2140	Italy	yes		yes		no	Use standard	no	yes
2141	Australia	no	not sure	no		yes		no	yes
2142	Indonesia	no	clouds	no		yes		no	yes
2143	Australia	yes		yes		Somewhat		no	yes
2144	Peru	not really although some pixels show up as flooded	clouds	no		yes		no	yes
2145	Bolivia, Peru	yes		yes		yes		no	yes
2146	Israel	no	clouds	no		yes		no	yes
2147	Russia	no	clouds	no		yes		no	yes
2148	Indonesia	yes	clouds, urban area	yes		yes		no	yes
2149	Indonesia	no	clouds	no		yes		no	yes
2150	Mozambique	yes	Otsu to sensative	might be, but many false positives		yes	Otsu shows rivers better and potientially flooding but seems also to create many false positives	no	yes
2151	Malaysia	not really	clouds	no, some flooding at coast but mostly showing river		yes		no	yes
2152	Australia	yes	no	yes		no		no	yes
2153	Zambia	no	Not sure	no		yes	Otsu has more scattered noise	no	yes
2154	Australia	yes	Don't use Otsu	yes		yes	Otsu has more scattered noise	no	yes
2155	USA	no	clouds	no		no		no	yes
2156	Indonesia	no	clouds & urban area	no		yes		no	Rain event seems to be still going on, maybe extend it by 7days
2157	Canada	no	clouds	no		yes		no	yes
2158	Indonesia	yes		yes		yes, maybe use Otsu	Otsu seems to get a good extent	no	yes
2159	USA	no	clouds	no		no		no	yes
2160	Pakistan	yes	Otsu doesn't seem to work, no red pixel, standard works very well in delta area	yes		no	Otsu seem to be broken for this event	no	yes
2161	Zambia, Angola	yes	Otsu doesn't seem to work, no red pixel, standard works very well in delta area	yes		no	Otsu seem to be broken for this event	no	yes
2162	Angola	yes	no	yes		yes, but probably use Otsu	Otsu seems to get a good extent, following a dry river bank	no	yes
2163	India	no	clouds	no		yes, too much noise	too much noise with Otsu	no	yes
2164	Lebanon, Israel	no	clouds	no		yes		no	yes
2165	Australia	no	partly clouds	no		yes		no	yes
2166	Australia	no	clouds	no		yes		no	yes
2167	USA	yes	no	yes		yes	Both look reasonable	no	yes
2168	USA	no	clouds	no		yes		no	yes
2169	France, Spain	yes	no	yes		no	Otsu doesn't detect anything	no	yes
2170	Australia	yes	Otsu doesn't seem to work, no red pixel, error in the status bars where loading shows	yes, standard method		no	Otsu doesn't load	no	yes
2171	Zimbabwe, Mozambique	no	Clouds	no		yes		no	yes
2172	Greece	yes	no	yes, use standard method		no		no	yes
2173	Brazil	yes	no	yes, use standard method		no, Otsu doesn't load	Otsu doesn't load	no	yes
2174	Greece, Turkey	yes	no	yes, use standard method		no	Think standard looks more realistic	no	yes
2175	Turkey	yes	no	yes, use standard method		no	Think standard looks more realistic	no	yes
2176	Australia	yes	no	yes		no	Both look reasonable	no	yes
2177	USA	yes	no	yes		no	Both look reasonable	no	yes
2178	Zimbabwe, Mozambique	yes	some clouds	yes		yes	hard to say, both capture flooding, at the coast Otsu seems to over estimate	no	yes
2179	Spain	yes	no	yes		somewhat	Both look reasonable	no	yes
2180	Australia	yes	no	yes		somewhat	Both look reasonable	no	yes
2181	Zambia	yes	no	yes		no	Both look reasonable	no	yes
2182	USA	yes	no	yes		no	Both look reasonable	no	yes
2183	USA	yes	no	yes		yes	Both look reasonable	no	yes
2184	Afghanistan	no	not sure	no		no		no	yes
2185	Colombia	no	not sure	no		yes	Otsu has ~4 pixels of flooding in the DFO polygon but looks scattered	no	yes
2186	Colombia	no	clouds	no		yes, scattered pixels, seems to be over estimating	Otsu over estimates	no	yes
2187	Ukraine	yes	not sure but standard is unrealistic large	yes, Otsu		no	Otsu looks more reasonable	no	yes
2188	South Africa	no	clouds	no		no		no	yes
2189	Philippines	no	clouds	no		no		no	yes
2190	Indonesia	no	not sure	no		no		no	yes
2191	Russia, China	yes	no	yes		no, standard bigger	Use standard method	no	yes
2192	New Zealand	no	clouds	no		no		no	yes
2193	Belarus, Urkaine	yes	no	yes		no	Both look reasonable	Yes, but looks like something goes wrong with both methods. Too many false positives outside DFO downstream, especially for standard method...., but could be flooding	yes
2194	Mozambique	yes	no	yes		yes	Not sure which one to use	no	yes
2195	Iran	no	clouds	no		yes		no	yes
2196	Iran	no	not sure MODIS doesn't load	no		yes		no	yes
2197	Indonesia	no	clouds and maybe vegetation	no		no		no	yes
2198	Canada	yes	no	yes		no	Use standard	no	yes
2199	Russia	yes	OTSU doesn't load; Standard to many false positives	maybe		OTSU doesn't load		no	yes
2200	Azerbaijan, Armenia, Iran	no	yes	no	clouds	no		no	yes
2201	Afghanistan	no	yes	no	not sure what the problem is	no		no	yes
2202	Malawi	no	yes	no	probably clouds	no		no	yes
2203	USA	maybe	yes	not really	clouds	no		no	yes
2204	Tajikistan	no	yes	no	clouds	no		no	yes
2205	Oman	no	yes	no	Both Otsu and Standard method show not any pixel	no		no	yes
2206	Azerbaijan	yes	no	yes		no		no	yes
2207	Puerto Rico	no	yes	no	clouds	yes		no	yes
2208	Russia	yes	yes	yes	many scattered pixels for both methods	no	both look reasonable disregarding the scattered pixels	yes, upstream and downstream	yes
2209	Russia, Belarus, Ukraine	yes	no	yes		no	Both look reasonable	no	yes
2210	Afghanistan	no	yes	no	vegetation probably	somewhat		no	yes
2211	Afghanistan	no	yes	no	clouds	yes	Otsu many scattered pixels	no	yes
2212	Afghanistan	no	yes	no	not sure what the problem is	no		no	yes
2213	Kenya	yes	no	maybe		no		no	yes
2214	Russia	yes	no	yes		no		no	yes
2215	Afghanistan	no	yes	no	not sure	yes	many scattered pixels	no	yes
2216	Argentina	yes	no	yes		no	Both look reasonable	no	yes
2217	Australia	no	yes	no	clouds	somewhat		no	yes
2218	Island between Tasmania and South Africa	no	yes	no	clouds	yes		no	yes
2219	USA, Alaska	yes	yes	maybe	Standard method output doesn't load	Yes, Otsu seems to overestimate though	Overestimate of Otsu, Standard method doesn't generate any output.	Both upstream and downstream is flooding captured by Otsu but not sure if Otsu is overestimating	Precipitation chart doesn't load
2220	PNG	yes	no	yes		similar	Both look reasonable	upstream is some flooding detected as well	yes
2221	Russia	yes	no	yes		yes	Use Otsu	no	yes
2222	Malaysia	yes	no	yes		yes	Use Otsu	no	yes
2223	USA	no	yes	no	clouds	yes		no	yes
2224	Ethiopia, Somalia	yes	no	yes		somewhat	Both look reasonable	no	yes
2225	USA	yes	no	yes		yes	Use Otsu	no	yes
2226	Somalia	yes	Otsu to sensitive	no		yes	Otsu too sensitive, much scatter	no	yes
2227	Iran	no	not sure	no		yes		no	yes
2228	Australia	no	clouds	no		yes		no	yes
2229	USA	no	not sure	no		no		no	yes
2230	Madagascar	no	no	no	clouds, no flooding	yes	Otsu shows larger area, mainly outside DFO polygon	no	yes
2231	China	no	yes	no	clouds, no flooding	no		no	yes
2232	Sri Lanka	maybe	yes	maybe	Only Otsu shows flooding	yes	Otsu shows larger area but that could be flooding	no	yes
2234	Iran	no	yes	no	clouds, no flooding	no		no	yes
2235	Philippines	no	yes	no	clouds, no flooding	no		no	yes
2236	Afghanistan	no	yes	no	not sure, no clouds	no		no	yes
2237	USA	no	yes	no	Most likely clouds	yes	Otsu just somewhat larger	no	yes
2238	Russia	yes	yes	yes		yes	Standard method has no data, use Otsu	yes, extend event to downstream as well	yes
2239	Moldova	no	yes	no	Not sure, but no flooding	no		no	yes
2240	Venezuela	no	yes	no	Clouds, maybe urban area	yes		no	yes
2241	Russia	no	yes	no	Clouds	no		no	yes
2242	China	no	yes	no	Not sure	no		no	yes
2243	Mexico	no	yes	no	Partly cloudy & urban area	no		no	yes
2244	Azerbaijan	no	yes	no	urban flooding	no		no	yes
2245	China	maybe	yes	maybe	Otsu shows flooding. Many clouds as well	yes	Otsu shows some flooding, might be useful	yes, extend event to downstream as well	partly, extend with 7days
2246	Tajikistan	no	yes	no	Not sure, MODIS shows some water but Otsu & Standard don't pick up on it	no	Within DFO polygon, MODIS shows water but Otsu & Standard don't pick this up	no	yes
2247	Nigeria	no	yes	no	Clouds	no		no	yes
2248	India, Bangladesh	yes	yes	yes		no	Otsu doesn't load, red error bar	no	yes
2249	Mexico	no	yes	no	Urban flooding	no		no	yes
2250	Nigeria	no	yes	no	Urban flooding	no		no	yes
2251	Colombia	no	yes	no	clouds	no		no	yes
2252	Colombia	no	yes	no	Urban flooding	no		no	yes
2253	USA	yes	no	yes		yes	Otsu seems ok, some false positives but some flooding detected	yes, extend event to downstream as well	yes
2254	Philippines	no	yes	no	clouds	no		no	yes
2255	East Timor	no	yes	no	clouds	no		no	yes
2256	Afghanistan	no	yes	no	not sure, partly clouded, nothing detected though within DFO polygon	no		no	yes
2257	India	yes	no	yes		yes	Not sure which to use, Otsu larger	no	yes
2258	India	no	yes	no	urban flooding	no		no	yes
2259	USA	maybe	yes	maybe	some flooding, Otsu more	yes	Otsu shows more flooding, not sure if this is real though	no	yes
2260	India	no	yes	no	clouds	no	Otsu doesn't load	no	yes
2261	China	yes	yes	yes		no	Otsu doesn't load, red error bar	no	yes
2262	USA	no	yes	no	no flooding, not sure why not	yes	Otsu somewhat bigger, but not sure if that is real or not	no	yes
2263	Guatemala	no	yes	no	urban flooding	no		no	yes
2264	Philippines	yes	no	yes		yes	somethat larger	no	yes
2265	Afghanistan	no	yes	no	no flooding, not sure why not	no		no	yes
2266	Iran	no	yes	no	Otsu shows some flooding, but I'm doubt that is real. MODIS not loading so not sure if it is cloudy or not	yes	Not sure if Otsu is real	no	yes
2267	New Zealand	no	yes	no	cloudy, not flooding	yes	neither useful	no	yes
2268	Uruguay	no	yes	no	clouds	no		no	yes
2269	China	yes	no	yes		yes	not sure which best to use	no	yes
2270	Uganda	no	yes	no	urban flooding	no		no	yes
2271	Afghanistan	no	no	no	No flooding detected, no clouds though...	no		no	yes
2272	Afghanistan	no	yes	no	Not sure, image clear	yes	Looks like Otsu catches some mountain shadows outside DFO polygon	maybe	yes
2273	USA	yes	no	yes		no		no	yes
2274	Mexico	no	yes	no	urban flooding	no	Both methods don't show up	no	yes
2275	Nepal	no	yes	no	Flooding in mountain region?, or cloud problem	yes	Otsu is totally off, way too large	Bramaputra is flooding, but DFO box is on Nepal	yes
2276	Myanmar	yes	yes	yes		yes	Otsu is too large, use Standard method	no	yes
2277	Afghanistan	no	yes	no	Not sure	yes	scattered false positives for Otsu	no	yes
2278	China	no	yes	no	not sure, partly clouded	no		no	yes
2279	Pakistan, India	yes	yes	yes		no	Otsu doesn't load, red progress bar	no	yes
2280	Afghanistan	no	yes	no	not sure	yes	Otsu many false positives, not useful. Standard product doesn't show anything	no	yes
2281	Mexico	no	yes	no	clouds	no		no	yes
2282	Venezuela	no	yes	no	urban flooding	yes		no	yes
2283	Japan	no	yes	no	clouds	no		no	yes
2284	Philippines	yes	no	yes		yes	not sure which one is right	no	yes
2285	Ethiopia	no	yes	no	water detected, but this is permanent water	yes	not sure which one is right	no	yes
2286	USA	no	yes	no	Otsu detects nothing, standard only permanent water	no	Otsu is failing	no	yes
2287	Mongolia	no	yes	no	only permanent water detected	no		no	yes
2288	Kazakhstan	maybe	yes	maybe	some flooding, lake extended	yes	only little bit larger	no	yes
2289	Venezuela	maybe	yes	maybe	some flooding	yes		no	yes
2290	Nigeria	no	yes	no	vegetation/clouds	no		no	yes
2291	China	no	yes	maybe	very small area at a coastline, looks like flooding, but very small	yes		no	yes
2292	Panama	no	yes	no	clouds	no		no	yes
2293	Nigeria	no	yes	no	clouds	yes	Looks like Otsu right though	no	yes
2294	Nigeria	no	yes	no	MODIS won't load	yes		no	yes
2295	USA	maybe	yes	maybe	Standard doesn't create product	yes	Standard doesn't load, Otsu seems too large	no	yes
2296	China	yes	yes	yes		no	Otsu doesn't load	no	yes
2297	Vietnam	yes	yes	maybe	No flooding in DFO polygon but east-south is flooding	yes	Otsu shows more flooding, could be right	yes, extend event to downstream as well	yes
2298	Sudan	no	yes	no	Overestimation by Otsu	yes	Otsu too sensitive	no	yes
2299	India	no	yes	no	clouds maybe	no		no	yes
2300	Afghanistan	no	yes	no	probably flashflooding	no		no	yes
2301	China	no	yes	no	Otsu too sensitive	yes	Otsu is too sensitive and Standard doesn't detect much	no	yes
2302	Russia	no	yes	no	Otsu doesn't load	no		no	yes
2303	Chad	yes	yes	yes		no	Otsu doen't load, read bar	no	yes
2304	Vietnam	no	yes	no	Clouds	yes	Otsu doesn't seem to show flooding, mostly scatter	no	yes
2305	Thailand	no	yes	no	clouds	yes	Standard doesn't pick up much, Otsu seems to do a better job but outside DFO polygon so not sure if it is real flooding	no	yes
2306	Canada	no	yes	no	urban flooding	no		no	yes
2307	Sudan	yes	yes	maybe	Otsu detect flooding but might be too sensitive	yes	Standard shows minimal flooding	no	yes
2308	Vietnam	maybe	yes	maybe	clouds, otsu too sensitive	yes	Standard shows modest flooding, Otsu too sensitive it seems	no, but upstream seems to be flooding as well	yes
2309	Estonia	no	yes	no	clouds	no		no	yes
2310	Korea	no	yes	no	Otsu doesn't load. Cloudy	no	Otsu doesn't load. Standard only capturing river, lakes	no	yes
2311	Nigeria	yes	no	yes		yes	Hard to decide which method captures best flooding. Otsu larger	some, downstream the Niger, mostly in floodplains though	yes
2312	India	No	No	No	Does not exist	Does not exist	None	No	Does not exist
2313	Japan	no	yes	no	clouds	no		no	yes
2314	Nigeria	Yes	No	Yes	None	Does not exist	None	No	Yes
2315	Algeria	no	yes	no	Otsu doesn't load (Red error bar)	no	Otsu red error bar	no	yes
2316	Senegal	Yes	No	Yes	None	Does not exist	None	No	Yes
2317	South Africa	no	yes	no	urban flooding	yes		no	yes
2318	Philippines	No	No	No	No flooding	Does not exist	None	No	Does not exist
2319	Russia	No	No	No	No flooding	Does not exist	None	No	Does not exist
2320	Mali	Yes	No	Yes	None	Does not exist	None	No	Yes
2321	China	maybe	no	maybe	Minimum amount of flooding near river (braided river)	no		no	yes
2322	Ethiopia	no	no	no	Clear MODIS image, not much flooding though. Maybe flashflooding or sediment concentration high in river	no		no	yes
2323	main country (or multiple) where flooding is occuring	No	No	No	Does not exist	Does not exist	None	No	Does not exist
2324	USA	no	yes	no	Both Standard and Otsu don't show anything	no		no	yes
2325	USA	no	yes	no	MODIS doesn't load	yes	Otsu captures rivers & lakes nice but no flooding within DFO polygon (or outside)	no	yes
2326	Korea	no	yes	no	clouds	yes		no	yes
2327	Mexico	no	yes	no	clouds	yes		no	yes
2328	China	maybe	yes	maybe	clouds	yes	Otsu captures some flooding at the coast. Might be real but hard to say. MODIS very cloudy	no	yes
2329	Australia	maybe	yes	maybe	clouds	yes	Flooding minimal but there is some in DFO polygon. Otsu captures some more	no	yes
2330	Australia	yes	no	yes		yes	Both could be used	no	yes
2331	Kenya	no	yes	no	MODIS & Otsu don't load but I assume clouds	no		no	yes
2332	China	yes	yes	yes	Otsu doesn't load.	no	Otsu doesn't load	yes, neighboring areas	yes
2333	USA	no	yes	no	MODIS doesn't load. Otsu too sensitive	yes	Standard doesn't capture much & Otsu too sensitive	no	yes
2334	Kenya	maybe	no	maybe	Some flooding near the lake, just a clump of pixels.	no	Both Standard and Otsu capture the clump of pixels near the lake, so some flooding	no	yes
2335	Romania	no	yes	no	MODIS doesn't load	no		no	yes
2336	Russia	yes	no	yes		yes	Otsu seems to capture water decent
2337	China	yes	yes	yes	Otsu captures flooding on floodplain within DFO polygon	yes	Otsu seems to capture flooding well at least in DFO polygon, outside maybe over estimating?	yes, neighboring areas	yes
2338	India	yes	no	yes	Both Otsu and Standard are probably useful	yes	Both can be useful though	no	yes
2339	Haiti	no	yes	no	probably urban flooding	yes		no	yes
2340	Italy	no	yes	no	cloudy	yes		no	yes
2341	USA	no	yes	no	cloudy	yes		no	yes
2342	USA	yes	no	yes		yes	Both look reasonable, Otsu larger though	no	yes
2343	Pakistan	no	yes	no	clouds, Otsu picks up cloud shadows	yes	Otsu captured cloud shadows	No, some flooding detected with Otsu but not sure if that is real	yes
2344	Ethiopia	no	yes	no	MODIS not loading. Not sure why no floods show up	no		no	yes
2345	Nigeria	yes	no	yes		yes	Both look reasonable		yes
2346	Vietnam	maybe	yes	maybe	Clouds. Some flooding with Otsu but I'm not sure this is real	yes	Otsu captures way more flooding, not sure if that is real	no	yes
2347	Thailand	yes	no	yes		yes	Otsu might have a bit more scatter	no	yes
2348	Korea	yes	no	yes		yes	Both look reasonable	no	yes
2349	USA	no	yes	no	Permanent water is detected, not more. Cloudy	yes		no	yes
2350	Tunisia	no	yes	no	Urban flooding + clouds	no			yes, but maybe extend with 7days just to be sure
2351	Turkey	no	yes	no	MODIS doesn't load	no			yes
2352	USA	maybe	yes	maybe	Mostly permanent water is captured, but maybe also some floodplain flooding? Not sure though, also in Urban area so hard to capture anything	yes	Otsu seems reasonable though		yes
2353	China	no	yes	no	clouds	yes			yes
2354	Nepal	no	yes	no	Otsu captured some mountain shadows	yes	mountain shadows	yes, in India	yes
2355	Philippines	no	no	no	partly clouded, not sure why flooding isn't picked up. Maybe too small	no		no	yes
2356	Mexico	yes	no	yes	If problem, it is mostly as coastal pixels show up as well, but there is some flooding also	yes	Not sure which one is 'better'	no	yes
2357	Afghanistan	no	yes	no	Otsu give scattered product	yes	Otsu seems to sensitive here	no	yes
2358	Malaysia	no	yes	no	partly cloudy + urban flooding	yes	Otsu somewhat scattered	no	yes
2359	France	yes	no	yes		no	both look reasonable, some flooding close to the lakes, looks like farm fields are under water	no	yes
2360	Italy	no	yes	no	cloudy	no		no	yes
2361	Nigeria	yes	no	yes		yes	both look good!	yes, mostly permanent water but maybe some flooding as well	yes
2362	Sri Lanka	maybe	yes	maybe	Cloudy, but Otsu captured something that could be flooding. Is very minimal though	yes	Not sure if these are false positives by Otsu or not, could be flooding	no	yes
2363	New Zealand	no	yes	no	Clouds	yes	most coastal area, ocean detection	no	yes
2364	Malaysia, Thailand	maybe	yes	no	There are a few pixels indicating flooding but I think those are false positives of maybe cloud shadow	yes	could be scatter	no	yes
2365	Mexico	yes	yes	maybe	Cloudy but some flooding detected other than permanent water just below Villahermosa	yes	not sure which of the two is best	no	yes
2366	USA, Mexico	yes	no	yes		yes	Otsu has some flase positives	no	yes
2367	Algeria	no	yes	no	partly cloudy	no		no	yes
2368	Vietnam	yes	yes	yes	cloudy	yes	Otsu might spot more flooding, could be too sensitive though. Standard has minimal flooding	no	yes
2369	USA, Canada	no	yes	no	cloudy	yes	Otsu somewhat larger, end of October though, could be low sun angle sensitivity	no	yes
2370	Thailand	yes	no	yes	Flooding is also outside DFO polygon	yes	both look ok though	no	yes
2371	Georgia, Russia	no	yes	no	clouds	no		no	yes
2372	Brazil	yes	no	yes	Flooding is also outside DFO polygon	yes	both look ok	no	yes
2373	Colombia	maybe	yes	maybe	cloudy, captured permanent water but maybe some flooding as well, hard to tell	yes	both look ok	yes	yes
2374	Rwanda	no	yes	no	cloudy	no		no	yes
2375	Hungary	no	yes	no	not sure why nothing is captured, flooding to small?	no		no	yes
2376	Philippines	maybe	yes	maybe	Only few pixels show flooding (Otsu), maybe event was too small?	yes		no	yes
2377	Indonesia	no	yes	no	partly cloudy	yes		no	yes
2378	Papua	no	yes	no	cloudy & vegetation	yes	Otsu captures some flooding but I think these are false positives	no	yes
2379	Saudi Arabia	no	yes	no	urban area + cloudy	no		no	yes
2380	Dominica + other islands	yes	no	yes	cloudy	yes	Both look ok	no	yes
2381	Argentina	yes	no	yes		yes	both look realistic though	somewhat outside DFO polygon as well	yes
2382	USA	no	yes	no	Urban flooding	no		no	yes
2383	Vietnam	maybe	yes	maybe	Otsu detects some flooding but I'm not sure it is real. MODIS is cloudy	yes		no	yes
2384	South Africa	no	yes	no	urban area. Also, MODIS doesn't load	no		no	yes
2385	Sierra Leone	no	yes	no	Otsu doesn't load.	no	Otsu doesn't load	no	yes
2386	Spain	yes	no	yes		yes	Standard only less scatter	no	yes
2387	Morocco	no	yes	no	clouds	no		no	yes
2388	USA	no	yes	no	Not sure why no flooding is detected, clear image, maybe flooding to small	no		no	yes
2389	Indonesia	no	yes	no	cloudy	no		no	yes
2390	Vietnam	yes	yes	maybe	Otsu detects some flooding but it is cloudy	yes	Otsu could be right....	no	yes
2391	Canada	maybe	yes	maybe	permanent water is picked up and some flooding. Cloudy as well, and end of the year in higher latitude	no	Minimal flooding, mostly permanent water	no	yes
2392	Honduras	no	yes	no	clouds	no		no	yes
2393	Brazil	no	yes	no	Clouds & Urban area (Rio)	no		no	yes
2394	Colombia	no	yes	no	Otsu shows permanent water, no flooding	yes	Standard is too conservative	no	yes
2395	France	yes	no	yes		no	both fine	no	yes
2396	Australia	no	yes	no	clouds & urban flooding (Melbourne)	no		no	yes
2397	Indonesia	no	yes	no	clouds & urban flooding (Melbourne)	yes	Otsu picks up something but it looks mostly like scatter	no	yes
2398	Venezuela	maybe	yes	maybe	Minimal flooding with Standard, bit more with Otsu but still very minimal. Maybe due to water vapor or some clouds, otherwise I won't know	yes	Somewhat larger Otsu, but still not much flooding	no	yes
2399	Indonesia	no	yes	no	urban area + clouds	no		no	yes
2400	Dominica	no	yes	no	clouds	yes		no	yes
2401	Malaysia	no	yes	no	clouds	no		no	yes
2402	Thailand	no	yes	no	Some flooding at the coast but it is really minimal. MODIS composit didn't show any flooding due to clouds	yes		no	yes
2403	Indonesia	yes	yes	yes	3 DFO polygons, 1 flood nicely captured, other 2 areas less. Standard probably best although....	yes	Otsu captures flood well but has some scatter as well	no	extend period with 7days just to be sure all is captured
2404	Tunisia	no	yes	no	clouds	no		no	yes
2405	Costa Rica	no	yes	no	clouds	no		no	yes
2406	Malaysia	maybe	yes	maybe	clouds, some flooding shows, more with Otsu than with Standard but not sure if that is real	yes	Otsu could be too sensitive	no	yes
2407	Philippines	yes	no	yes		yes	both look reasonable	no	yes
2408	Tanzania	no	yes	no	Looks like there is no MODIS image for that period over the small area	no		no	yes
2409	Bolivia	no	yes	no	clouds	no		no	yes
2410	Turkey	maybe	yes	maybe	Urban area + clouds but still some flooding with Standard method	no	use standard	no	yes
2411	USA	no	yes	no	clouds + urban area	no		no	yes
2412	USA	yes	no	yes	Beautiful fluvial flooding!	no		no	yes
2413	Guyana	maybe	yes	maybe	Clouds. Also, Otsu detect flooding but not permanent water so think this is not a useful product but not 100% sure	yes	Otsu might over estimate	no	yes
2414	Peru	no	yes	no	partly cloudy	no		no	maybe extend period with 1week
2415	Iran	yes	no	yes	partly cloudy	no	both look reasonable	no	yes
2416	Bolivia	no	yes	no	urban area + clouds	no		no	yes
2417	Australia	yes	yes	yes	Otsu doesn't load (red loading bar)			no	Precipitation graph doesn't load, GEE memory limit reached
2418	Brazil	maybe	yes	maybe	Otsu doesn't load (red loading bar). Also, minimal flooding with standard method			no	yes
2419	Afghanistan	no	yes	no	clouds	no		no	yes
2420	Yemen	no	yes	no	Clear MODIS, but no flooding	no		no	yes
2421	Namibia	no	yes	no	Urban area + partly clouded	no		no	yes
2422	Malaysia	no	yes	no	clouds	yes		no	yes
2423	Mozambique	yes	no	yes	Use also upstream area	yes	Hard to say which one is right, Standard is more conservative	no	yes
2424	Australia	yes	no	yes		no		no	yes
2425	Angola	yes	no	yes	Use standard, scatter for Otsu	yes	Use standard, Otsu = scattered	no	no, extend with 1week to make sure
2426	Kazakhstan	yes	no	yes		no		no	yes
2427	Tanzania	no	yes	no	urban area (small)	no		no	yes
2428	United Kingdom	yes	no	yes		no	both look reasonable	no	yes
2429	Indonesia	maybe	yes	maybe	clouds. Small stretch of flooding at the coast, but very small. I expect more flooding is under the clouds	yes	not sure if Otsu is right	no	yes
2430	Angola, Zambia	yes	no	yes	Otsu doesn't load (red error bar)		Otsu doesn't load (red error bar)	no	yes
2431	Madagascar	yes	no	yes		no	both can be used	no	yes
2432	Iran	yes	no	yes		no		no	yes
2433	Turkey	yes	no	yes		no		no	yes
2434	Philippines	yes	no	yes		yes	both look reasonable	no	yes
2435	New Zealand	maybe	yes	maybe	clouds. Minimal flooding, but some. Must be more though but cloudy	yes	Otsu somewhat larger, minimal flooding though.	no	yes
2436	Australia	no	yes	no	Relative clear MODIS image, but not much to see. Maybe sediment rich rivers?	no		no	yes
2437	Indonesia	yes	no	yes		yes	Not sure which one is best, Flooding is larger than DFO polygon	no	yes
2438	Indonesia	maybe	yes	maybe	Urban area, no flooding but outside in coastal area indicated by event 2437 there is flooding	yes	Not sure which one is best, Flooding is larger than DFO polygon	no	yes
2439	Indonesia	no	yes	no	cloudy	yes		no	yes
2440	Brazil	yes	yes	yes	OTSU doesn't load (red bar)			no	yes
2441	Australia	yes	no	yes		no		no	yes
2442	Australia	yes	no	yes		no	both useful	no	yes
2443	Bolivia	yes	no	yes		no		no	yes
2444	Australia	yes	no	yes		no	both useful	no	yes
2445	Russia	no	yes	no	clouds	no		no	yes
2446	USA	no	yes	no	clouds	no		no	yes
2447	Australia	maybe	yes	maybe	Clouds. There is minimal flooding in the south of the DFO polygon, but it is minimal	yes	Not sure what is best Otsu/Standard	no	yes
2448	Mozambique	yes	no	yes		yes	Not sure what is best Otsu/Standard	no	yes
2449	Papua	maybe	yes	maybe	Clouds. Some flooding (minor) detected with Otsu, could be scatter hard to say	yes	Otsu gives lots of scatter	no	yes
2450	Turkey	maybe	yes	maybe	partly cloudy. Permanent water bodies seem to be somewhat larger due to amount of water, so that could be flooding.	no		no	yes
2451	Brazil	no	yes	no	clouds	yes		no	yes
2452	Canada	no	yes	no	urban area, clouds	no		no	yes
2453	Russia	no	yes	no	cloudy	no		no	yes
2454	Malaysia	no	yes	no	cloudy	yes	Otsu a bit scattered	no	yes
2455	USA	yes	no	yes		no	both useful	no	yes
2456	Madagascar	maybe	yes	maybe	cloudy but minimal flooding detected	no	both useful	no	yes
2457	Indonesia	maybe	yes	maybe	minimal flooding detected, otsu larger than standard. Cloudy though	yes	only a few pixels of flooding, bit more for Otsu than for standard	no	yes
2458	Australia	yes	no	yes		yes	not sure which is best	no	yes
2459	Papua	no	yes	no	not sure, no clouds, maybe vegetation	no		no	yes
2460	Croatia, Bosnia	yes	no	yes	There are clouds though	no		no	yes
2461	Australia	yes	no	yes	cloudy	no	Otsu somewhat smaller	no	yes
2462	Canada, USA	yes	yes	yes	Otsu doesn't load. Flooding does occur outside DFO polygon as well			no	yes
2463	Belarus, Russia	yes	no	yes		no	Otsu bit more scatter	yes, to the south	yes
2464	Mexico, USA	no	yes	no	Otsu too much scatter it looks like. Cloudy	yes	Otsu shows some scatter	no	yes
2465	Fiji	no	yes	no	clouds	no		no	yes
2466	Yemen	no	yes	no	partly clouded, I don't see any flooding on composit but could be very sediment rich rivers?	no		no	yes
2467	Kenya	no	yes	no	Permanent water bodies show up, but no flooding although MODIS shows some more water it looks like	no		no	yes
2468	Peru	no	yes	no	No flooding in DFO polygon. Partly cloudy there. Small area, maybe MODIS resolution not good enough	no		no	maybe extend period with 1week
2469	Croatia, Bosnia, Serbia, Romania, Hungary	yes	no	yes		no	Otsu is at some places a bit larger than standard	no	yes
2470	Djibouti	no	yes	no	urban area	no	not sure if Otsu and Standard are even loading	no	yes
2471	Russia	yes	no	yes		no	Standard might capture flood a bit better	no	yes
2472	Saudi Arabia	no	yes	no	Urban area + partly cloudy	no		no	yes
2473	Bangladesh, India	yes	no	yes		yes	Use standard, Otsu too much scatter	no	yes
2474	Vietnam	no	yes	no	cloudy	yes	Otsu seems to have too much scatter. Standard doesn't show flooding	no	yes
2475	Tanzania	no	yes	no	cloudy although MODIS shows some dark areas = some flooding maybe	no	nothing shown in DFO polygon	no	yes
2476	USA	yes	yes	yes	Don't use Otsu, captures mountain shadows	yes	Otsu captures mountain shadows	no	yes
2477	Ethiopia	no	yes	no	Not sure why no flooding is showing up. MODIS doesn't load (red error bar)	no		no	yes
2478	USA	no	yes	no	cloudy but permanent water bodies show up	no		no	yes
2479	Iran	no	yes	no	MODIS doesn't load, so maybe cloudy?	no		no	yes
2480	Indonesia	yes	yes	yes	Clouds. Flooding on the Mahakam Delta though	yes	not sure which one is best to use	no	yes
2481	Costa Rica	no	yes	no	clouds	no		no	yes
2482	USA	yes	yes	yes	clouds but some flooding captures with Standard. Otsu gives even more flooding that actually looks realistic	yes	Otsu might be the one to use	no	yes
2483	China	no	yes	no	Clouds. Poyang lake (which I studied for some time) shows up nicely though.	no		no	yes
2484	Thailand	no	yes	no	clouds	yes	Otsu seems to be unrealistic (all outside DFO)	no	yes
2485	USA	maybe	yes	maybe	clouds. Permanent water is mostly detected but some small areas show a bit flooding	no	both can be used ..... that is, if these small areas are showing the actual flooding, which is really small	no	yes
2486	Dominica	no	yes	no	some clouds	no		no	yes
2487	China	no	yes	no	clouds + urban area	no	Otsu does show some false positives outside DFO polygon	no	yes
2488	USA	maybe	yes	maybe	Small areas of flooding within DFO polygon. Outside flooding as well	yes	Otsu captures mostly the small areas of flooding within DFO polygon. Outside polygon flooding as well	yes, towards the west of the DFO polygon	yes
2489	China	no	yes	no	partly cloudy	no		no	yes
2490	Brazil	no	yes	no	urban area + clouds	no		no	yes
2491	USA	yes	no	yes		no	both useful	no	yes
2492	Macedonia	maybe	yes	maybe	small areas of flooding with Otsu, could be false positives though. Cloudy	yes	Otsu could be right though	no	yes
2493	China	no	yes	no	clouds	yes	Otsu is larger outside DFO polygon	no	no
2494	USA	no	yes	no	Clouds. Permanent water bodies are captured (better by Otsu but has also more scatter) but I cannot find any flooding	yes	Given Otsu captures permanent water bodies better, go with Otsu but there is a bit more scatter as well	no	yes
2495	Venezuela	yes	yes	yes	Problem: Otsu doesn't load (wonderful flooding though)			yes	yes
2496	India	no	yes	no	clouds	yes	Otsu captures cloud shadows outside DFO polygon	no	yes
2497	Georgia	no	yes	no	clouds	no		no	yes
2498	USA	yes	yes	yes	partly clouded	yes	Otsu does better job	no	yes
2499	Mexico	maybe	yes	maybe	Clouds. In DFO polygon there might be some flooding at the coast. Hard to say though. Otsu bit larger than Std.	yes	Otsu somewhat bigger, maybe too big (too sensitive, hard to say)	no	yes
2500	Russia	maybe	yes	maybe	partly clouded. Also, small area that might be flooded, not sure though	no	Std is fine	no	yes
2501	Romania	no	yes	no	not sure, MODIS doesn't show much flooding.	no		no	yes
2502	China	no	yes	no	clouds	no		no	yes
2503	Nigeria	no	yes	no	Urban area + clouds	no		no	yes
2504	Brazil	no	yes	no	clouds	yes	Otsu contains scattered pixels	no	yes
2505	Thailand	maybe	yes	maybe	clouds. Otsu captures flooding but seems way to sensitive	yes	Otsu seems too sensitive but hard to say with MODIS comp.	no	yes
2506	Slovakia	no	yes	no	urban area + clouds	no		no	yes
2507	Bangladesh, Myanmar, India	yes	yes	yes	Otsu doesn't load (red error bar)		Otsu doesn't load	no	yes
2508	China	no	yes	no	clouds	no	Permanent water is captured but I don't see much flooding beyond that	no	yes
2509	Nigeria	no	yes	no	MODIS doesn't show much, clear weather though	no		no	extend period with 7days just to be sure all is captured
2510	Nicaragua	yes	yes	yes	clouds, so might not capture full flooding	no	use standard, Otsu doesn't show anything	no	yes
2511	Russia	no	yes	no	Otsu too sensitive, Std doesn't record anything	yes	Otsu too sensitive, Std doesn't record much	no	yes
2512	Russia	no	yes	no	No flooding in DFO polygon. Some outside by Otsu detected but not sure if this is real (I think not)	yes	Looks like Otsu might be too sensitive, hard to tell though. Nothing in DFO polygon	no	yes
2513	North Maria Islands	no	yes	no	clouds	no	Both methods don't show		yes
2514	Philippines	yes	yes	yes	partly clouded	yes	Use Otsu, captures floods better	yes, outside DFO as well	yes
2515	China	yes	yes	yes	Std doesn't capture much. Otsu does well	yes	Otsu has some scatter but captures flooding too	no	yes
2516	Taiwan, Philippines, Korea	yes	yes	yes	Philipines use Otsu, Taiwan more flood should be captured (shows on MODIS), Korea is flooding capture by Otsu as well	yes	Use Otsu, captures floods better	no	yes
2517	Chile	no	yes	no	Std and Otsu don't show + clouds!			no	yes
2518	China	no	yes	no	clouds	yes	Otsu too sensitive but doesn't capture anything in DFO polygon	no	yes
2519	Nepal, India	yes	yes	yes	No flooding in DFO polygon. Much outside by Std, not by Otsu as Otsu shows tooooooooo much flooding	yes	Don't look at Otsu	yes, outside DFO as well	yes
2520	USA	no	yes	no	clouds	yes	only at the coast though which could be ocean as well	no	yes
2521	Japan	no	yes	no	clouds	no		no	yes
2522	China	yes	no	yes		yes	Use Otsu	no	yes
2523	Canada	no	yes	no	clouds + urban area	no		no	yes
2524	Korea	no	yes	no	clouds	no		no	yes
2525	China	maybe	no	maybe	mostly permanent water, some flooding though	yes	Otsu and STd look very similar, Otsu slightly larger	yes, outside DFO as well	yes
2526	Afghanistan	no	yes	no	partly clouded	yes	Only outside DFO polygon though. Not sure that is real flooding	no	yes
2527	China	yes	no	yes		no		no	yes
2528	New Zealand	no	yes	no	partly cloudy	no		no	yes
2529	Georgia	no	yes	no	MODIS shows flooding, just isn't captured as far as I can judge	no	Both method don't see flooding that can be seen on MODIS I think	no	yes
2530	Vietnam	no	yes	no	Clouds, look that other areas (including in China) there is flooding but hard to say, MODIS is cloudy	yes	Otsu might over estimate? Anyway at least for China (which is outside DFO polygon)	no, but outside DFO polygon	yes
2531	Azerbaijan	no	yes	no	Looks like flooding is to small to be detected......	no		no	yes
2532	Romania	no	yes	no	clouds	no		no	yes
2533	China	maybe	yes	maybe	partly cloudy. Some flooding at the coast, better captured with Otsu. Otsu contains also scattered pixels	yes	Otsu seems to overestimate but also capture some flooding at the coast better	no	yes
2534	Poland, Slovakia, Hugary	yes	yes	maybe	partly cloudy, there is flooding though. Otsu somewhat larger but still reasonable	yes	Both can be useful	no	yes
2535	USA	no	yes	no	Permanent water is captured but flooding is in Dallas, Urban area + clouded so not captured	no		no	yes
2536	Thailand	maybe	yes	maybe	Probably flooding, Otsu might be right given the MODIS image but there are clouds as well so hard to tell	yes	Otsu larger, but given the MODIS image I would say, Otsu is probably detecting the extent well	no	yes
2537	USA	no	yes	no	urban area + clouds = not a useful product	no		no	yes
2538	Japan	no	yes	no	clouds	no		no	yes
2539	Philippines	yes	no	yes	cloudy though	yes	Otsu might be right, hard to say given the clouds.	yes, outside DFO as well	yes
2540	China	no	yes	no	Vegetation might be a problem	no	Otsu doesn't show	no	extend period with 7days just to be sure all is captured
2541	Pakistan, India	yes	yes	maybe	Otsu might be overestimating, Std is underestimating given the MODIS image. Part is cloudy. So probably not all flooding is captured and I don't know which method would be best	yes	Otsu overestimating, Std underestimating	yes, outside DFO as well	yes
2542	Saudi Arabia	no	yes	no	Urban area or flood period is to short	no		no	no, extend with several days
2543	Thailand	yes	no	yes	beautiful flooding!	yes	but both look good	no	yes
2544	South Africa	maybe	yes	maybe	cloudy and urban area but both Otsu and Std pick up something within DFO polygon. Not sure if it is real though	yes	Both could be real, not sure	no	yes
2545	Nigeria	no	yes	no	cloudy	no	I don't think anything is estimated by either method	no	maybe extend period with 1week
2546	Nigeria	no	yes	no	cloudy	no		no	yes
2547	China	no	yes	no	clouds + only permanent water shows	no	either one can be used but only permanent water shows	no	yes
2548	Canada, USA	no	yes	no	clouds	no		no	yes
2549	United Kingdom	no	yes	no	Too close to the coast, Otsu picks up something but not sure if those are coastal pixels	yes	Otsu catches more coastal pixels, not sure if this is flooding	no	maybe extend period with 1week
2550	USA	maybe	yes	maybe	looks like there is some flooding in the desert. Clouds are there as well so hard to tell	no	both can be used	no	yes
2551	Korea, Japan	no	yes	no	cloudy	no		no	yes
2552	Turkey	no	yes	no	cloudy	no		no	extend flood dates with 1week
2553	Nigeria	no	yes	no	cloudy	no		no	extend flood dates with 1week
2554	Philippines	yes	yes	yes	Otsu doesn't load. Std perfect flood though		Otsu doesn't load	no	yes
2555	Cambodia, Vietnam	yes	no	yes	Perfect flooding!	yes	Otsu might slightly overestimate	upstream	yes
2556	Japan	no	yes	no	clouds	no		no	yes
2557	USA	maybe	yes	maybe	Cloudy. Otsu might capture some though	yes	Not sure if Otsu is right though	no	extend with 2days
2558	Russia	no	yes	no	Not sure, some clouds but not too bad	no		no	yes
2559	China	maybe	yes	maybe	Otsu picks up some, but lots of clouds so hard to say if Otsu is correct	yes	Otsu might capture flooding, not sure	no	yes
2560	USA	no	yes	no	Mostly permanent water is captured. Otsu is somewhat larger	yes	Otsu is somewhat more flooding but still not much. More though by Otsu in Florida, not sure if that is real.....	no	yes
2561	Spain	no	yes	no	Partly clouded, flood event itself is probably small. Not much detected	no		no	yes
2562	Jamaica, Haiti, Trinidad, Grenada, cayman islands, USA	maybe	yes	maybe	Clouds. Some flooding on the Cayman Islands (Std better). Some flooding in USA but mostly permanent water detected (Otsu)	yes	Some areas Otsu is better, some areas Std is better	no	yes
2563	Taiwan	no	yes	no	clouds	no		no	yes
2564	Korea	no	yes	no	Clouds. Permanent water is detected, no flooding	no		no	yes
2565	USA	yes	no	yes	Small flooding both Otsu and Std pick it up	no	both useful	yes, outside DFO as well	yes
2566	Dominica, USA	yes	no	yes		yes	Otsu looks useful	yes, outside DFO as well	yes
2567	Panama	no	yes	no	urban flooding probably	no		no	yes
2568	Indonesia	maybe	yes	maybe	Clouds. Small flooding occurs, Otsu somewhat larger and is in a small town, could be real	yes		no	yes
2569	Japan	no	yes	no	clouds	no		no	extend with 1week
2570	Bangladesh, India	yes	no	yes		yes	Otsu unrealistic large	no	yes
2571	Australia	no	yes	no	clouds	no		no	yes
2572	Japan	no	yes	no	partly cloudy	no		no	yes
2573	Uganda	no	yes	no	Otsu doesn't load. Std too conservative			no	yes
2574	Colombia	maybe	no	maybe	Is Mompox area, mostly permanent water is detected	no	both look ok	no	yes
2575	Taiwan	no	yes	no	clouds	no		no	extend with 2days
2576	Nigeria	yes	no	yes	Urban area but Otsu picks up flooding	yes	Use Otsu	no	yes
2577	Central African Republic	no	yes	no	Urban area	no		no	yes
2578	Somalia	no	yes	no	Otsu way to sensitive	yes	Std doesn't show anything, Otsu toooooo sensitive	no	yes
2579	Ireland	no	yes	no	clouds	no		no	yes
2580	Indonesia	no	yes	no	clouds	yes	picks up only permanent water	no	extent with 1week
2581	Guatemala	maybe	no	maybe	Some flooding, west of permanent water body (lake). Very small though	no	both useful	no	yes
2582	Australia	no	yes	no	clouds	no		no	yes
2583	Uganda	no	yes	no	Only permanent water is captured. Not sure why there isn't any flooding detected	no		no	yes
2584	USA	yes	no	yes		no	both useful	no	yes
2585	Venezuela	no	yes	no	Otsu doesn't load. Partly clouded			no	yes
2586	Paraguay, Argentina	yes	no	yes	beautiful flooding!	no		yes, downstream, outside DFO polygon	yes
2587	Philippines	yes	yes	yes	partly cloudy	yes	both useful though	no	yes
2588	Venezuela	yes	no	yes		yes	Use Otsu	no	yes
2589	Philippines	yes	yes	yes	Partly cloudy, so northern flooding doesn't show	yes	Otsu could be right	no	yes
2590	Panama	maybe	yes	maybe	Cloudy. Otsu (and to a smaller extend Std) show some minor flooding	yes	Otsu could be right	no	yes
2591	Vietnam	no	yes	no	clouds	no		no	yes
2592	Philippines	yes	yes	yes	Partly cloudy, so northern flooding doesn't show	yes	Otsu could be right though	no	yes
2593	Indonesia	maybe	yes	maybe	clouds. Otsu picks up something, Std also a few pixels	yes	Otsu could be right though	no	yes
2594	Albania	no	yes	no	clouds	no		no	yes
2595	Russia	no	yes	no	clouds	no		no	yes
2596	Argentina	yes	yes	yes	clouds. Otsu seems to large but hard to say. Flooding also outside DFO Polygon	yes		yes, outside DFO polygon	yes
2597	USA	yes	no	yes	beautiful flooding!	no		no	yes
2598	Australia	yes	yes	yes	Otsu is tooooo sensitive	yes	Use Std	no	yes
2599	Iran	yes	no	yes	Use Std	no	Otsu seems to underestimate	no	yes
2600	Malaysia, Thailand	yes	yes	yes	clouds, but in the south you see flooding	no		no	yes
2601	Sri Lanka	yes	yes	yes	Clouds	no	both look useful	no	yes
2602	Angola	no	yes	no	clouds	no		no	yes
2603	South Africa	no	yes	no	Clouds	yes	Otsu picks up cloud shadows it looks like	no	yes
2604	Sri Lanka, India, Malaysia, Indonesia, Thailand	yes	yes	maybe	coastal flooding due to Tsunami. Flooding is hard to detect as coastal pixels often are selected, at least by Otsu. Some flooding by Std reported	yes	Otsu might pick up too many coastal pixels. Std shows some flooding but it is very minor	no	yes
2605	Italy	maybe	yes	maybe	clouds, but both Otsu and Std pick up something in DFO polygon. In city though, so urban area	no	both look useful	no	yes
2606	USA	yes	yes	yes	beautiful flooding!, but cloudy	no	both look useful	yes, extend to downstream	yes
2607	New Zealand	no	yes	no	cloudy	no		no	yes
2608	USA	no	yes	no	urban area + clouds	no		no	yes
2609	United Kingdom	maybe	yes	maybe	clouds, Otsu and Std pickup something but hard to tell if this is real flooding	yes	looks like Otsu is overestimating	no	yes
2610	USA	no	yes	no	clouds	no		no	yes
2611	Costa Rica	no	yes	no	clouds	no		no	yes
2612	Indonesia	yes	no	yes		yes	Otsu might be right though, covers flooding area better	no	yes
2613	Guyana	yes	no	yes		yes	Use Tsd, Otsu overestimating	no	yes
2614	Saudi Arabia	yes	yes	no	Otsu overestimating waaayyyy to much. Std doesn't pick up on flooding as water is such a different color (blueish-green)	yes	Otsu way too large extent, not usable. Std doesn't pick up on flood	no	yes
2615	Australia	no	yes	no	Clouds. Otsu overestimating	yes	Otsu way too large	no	yes
2616	South Africa	no	yes	no	Not sure, MODIS doesn't look very nice, hard to see any flooding. Partlyclouds	yes	Otsu larger mainly at the coast	no	no, extend period with ~7week or so
2617	Mozambique	yes	yes	no	MODIS shows flooding, Otsu & Std are too conservative, showing only permanent water	no		no	yes
2618	Brazil	no	yes	no	Only shows permanent water (both Otsu & Std). Don't see much flooding in MODIS. Cloudy	no		no	Extend with 5days
2619	Madagascar	no	yes	no	clouds. Looks like Otsu is not loading			no	yes
2620	Angola	yes	no	yes		yes	Use Otsu	no	yes
2621	Brazil	yes	yes	no	Both Otsu & Std don't pick really up on the flooding shown in MODIS.	no		no	yes
2622	Australia	no	yes	no	clouds	yes	Otsu captures better permanent water	no	yes
2623	Venezuela	maybe	yes	no	clouds	yes	Otsu might capture some flooding. Hard to say due to clouds	no	yes
2624	Pakistan	no	yes	no	clouds, also I don't see much flooding	yes	Otsu produces scattered pixels	no	yes
2625	Venezuela, Colombia	yes	yes	yes	Partly cloudy, Otsu captures flood best	yes	Use Otsu	no	yes
2626	Turkey, Greece	yes	no	yes		no	Std larger, use Std	no	yes
2627	Indonesia	yes	yes	yes	Flood partly captured. There are clouds as well	yes	Use Otsu	no	yes
2628	Bolivia	yes	yes	maybe	flood party captured by Otsu. Is more though	yes	Otsu is right though and misses some flooding as well	no	yes
2629	Kazakhstan	yes	yes	yes	Ostu doesn't load			no	yes
2630	Saudi Arabia	no	no	no	I don't see any flooding in MODIS. No clouds	no		no	yes
2631	Pakistan	no	yes	no	clouds	yes	Otsu might overestimate here	no	yes
2632	Afghanistan, Iran	yes	no	yes		no	both can be used	no	yes
2633	Madagascar	yes	no	yes		no	both useful	no	yes
2634	Algeria	yes	no	yes		yes	Std doen't load. Otsu gives flooding relatively well	no	yes
2635	Iran	no	yes	no	clouds	yes	Looks like Otsu is overestimating the extent	no	add 3more days
2636	Kazakhstan	no	yes	no	clouds	yes		no	yes
2637	Iraq, Iran	yes	no	yes	beautiful flooding!	no	Use Std	no	yes
2638	Zambia	yes	no	yes	beautiful flooding!	no	both useful	no	yes
2639	Afghanistan	no	yes	no	clouds	no		no	yes
2640	Slovakia, Hungary, Romania, Czech, Croatia, Serbia	yes	no	yes		no	Both looks useful	no	yes
2641	Pakistan	yes	no	yes		yes	Use Otsu	no	yes
2642	Madagascar	no	yes	no	clouds + urban area	no		no	yes
2643	New Zealand	no	yes	no	clouds	yes	Otsu more pixels at the coast. Doesn't look like flooding though	no	extend with 3days
2644	Afghanistan	no	yes	no	clouds	no		no	extend with 7days
2645	USA	no	yes	no	clouds	no		no	yes
2646	Colombia	maybe	yes	maybe	clouds	yes	use Otsu	no	extend with 7days
2647	Tanzania	no	yes	no	clouds	yes		no	yes
2648	Romania, Serbia	yes	yes	yes	Otsu doesn't load			no	yes
2649	Ethiopia	yes	yes	yes	Otsu toooooo sensitive, use Std	yes	Otsu too sensitive, use Std	no	yes
2650	Russia	yes	no	yes	beautiful flooding!	no	Otsue doesn't load (red bar)	no	yes
2651	Indonesia	no	yes	no	clouds	yes		no	yes
2652	Kenya	no	yes	no	I dont' see flooding. Only permanent water dectected	no	Only permanent water is detected by Otsu & Std	no	yes
2653	Afghanistan	no	yes	no	partly cloudy	no		no	yes
2654	Tajikistan	yes	yes	no	flooding is not really detected by either method	no		no	yes
2655	New Zealand	no	yes	no	cloudy	no		no	yes
2656	Brazil	no	yes	no	cloudy + urban area	no		no	yes
2657	Bangladesh	yes	no	yes		yes	Use Std	yes, around DFO polygon	yes
2658	Finland	no	yes	no	cloudy + Otsu & Std don't load			no	yes
2659	Russia	maybe	no	maybe	Flooding detected but I don't see it on MODIS	no		no	yes
2660	Bulgaria	no	yes	no	I don't see any flooding. Party cloudy as well	no		no	yes
2661	china	no	yes	no	partly cloudy. Don't see much	no		no	extend with 4days
2662	Ukraine	no	yes	no	no flooding seen in MODIS	no		no	no, extend with a week
2663	china	maybe	yes	maybe	Maybe some flooding in north east of DFO polygon. Lots of permanent water as well. Lots of clouds	yes	Use Std	no	yes
2664	Brazil	maybe	yes	no	too cloudy	yes	otsu captures lakes as flood; std does not	flood location unclear	yes
2665	Georgia	maybe	yes	maybe	small flood area	no	otsu shows nothing; std captures lakes and possible small flood in river plain	no	yes
2666	Canada / AB	yes	yes	maybe	urban flood; difficult to detect	yes	otsu captures more urban flood than std	yes, flooding along rivers	yes
2667	Tajikistan	no	yes	no	cloud, and/or small flood extent	yes	very few pixels for either	no	yes
2668	China	yes	yes	yes		yes	very few std pixels; otsu much better (if not overpredicting)	no	yes
2669	Taiwan	yes	no	yes		yes	otsu looks better	no	yes
2670	Tajikistan, Afghanistan	yes	yes	maybe	does not map flood extent well, but indicates flooding might have occurred	yes		downstream, just along river	too broad; signif. precip starts July 1, not June 15.
2671	China	no	yes	no	probably too cloudy			no	yes
2672	Kenya	no	yes	no	unknown; no sign of flood, probably too cloudy or too short-lived	NA	only lake Victoria for both	no	unknown
2673	United Kingdom	no	no	no	flash flood	NA		no	unknown
2674	China	no	yes	no	probably too cloudy	NA	only scattered pixels detected by std	no	unknown
2675	Pakistan	yes	no	yes		no	close, but std bigger	no	yes
2676	Bangladesh	yes	yes	yes		yes	otsu MUCH bigger, unclear if real or false positives	yes, up and downstream	no, significant rainfall up to a week later
2677	El Salvador	no	yes	no	probably too cloudy	yes	both only over expected water (lakes, coast)	NA	unclear
2678	India	no	yes	no	clouds or flash flood	NA		NA	unclear; bigger precip events starting 2 days later
2679	Chile	no	yes	no	cloudy	NA		NA	yes
2680	India, Pakistan	yes	no	yes		yes	otsu much bigger	no	started earlier perhaps
2681	Mexico	no	yes	no	possibly too cloudy or short-lived	yes	water detected over lagoon	NA	started 1 day earlier
2682	India	no	yes	no	presumably too cloudy	NA	neither detect significant pixels	NA	rain started few days earlier, lasted few days longer
2683	Australia	yes	no	yes		yes	about the same, but otsu slightly bigger	no	rain started 2 days before dates
2684	China	yes	no	yes		yes	only otsu shows water; looks reasonable, but concerning no std water detection	downstream	main rain started earlier and ended earlier than dates
2685	Korea	Yes	Yes	Yes	None	Yes	Otsu picks up some ag field standard does not	No	Yes
2686	India	yes	yes	yes		yes	otsu extremely large; likely too big. std likely too small	unclear	highest rainfall 5 days before event start date
2687	Romania	yes	yes	maybe	shows minimal flood areas	no	otsu shows no water; std shows some (mostly in rivers)	unclear	yes
2688	China	yes	no	yes		yes	otsu slightly larger, but more scattered pixels	downstream	yes
2689	Pakistan, India	yes	no	yes		yes	otsu hugely bigger; unclear how realistic	downstream	high rains both before and after flood dates
2690	Bangladesh, India, Nepal	yes	yes	yes		yes	otsu suggests half of bangladesh under water; std looks more reasonable but?	upstream	high rains throughout
2691	Japan	no	yes	no	flash flood?	NA	no pixels either	NA	higher rain before and after dates
2692	Romania	yes	no	yes		no	about the same	no	heavy rains started before and continue after
2693	China	yes	no	yes		yes	slightly bigger	no	heavy rain 4 days before event dates
2694	China, Taiwan	yes	yes	yes		yes		no	yes
2695	Malaysia	maybe	yes	maybe	only shows minor coastal flooding, which may be normal	yes	no std flood pixels at all	no	unclear; even rainfall over period
2696	China	no	yes	no	flash flood or too small in extent	NA	no flood in either	NA	unclear
2697	India	no	yes	no	too cloudy?	NA		NA	unclear
2698	India	yes	no	yes		yes	otsu huge; std quite small	no	extends too long
2699	Philippines	yes	yes	yes		yes	marginally bigger	no	unclear
2700	India	no	yes	no	cloudy	NA		NA	unclear
2701	Iran	no	yes	no	cloudy and/or flash flood	yes	only few scattered otsu pixels that may be cloud shadow	NA	unclear
2702	Turkey	no	yes	no	cloud and/or flash flood	NA		NA	no, more rain after dates
2703	South Korea	no	yes	no	cloud and/or flash flood	NA		NA	yes
2704	Sudan	yes	yes	maybe	unclear if all otsu water is flood; large portions do not appear correctly located for flood.	yes	no std water detected, only large otsu	NA	yes
2705	Bulgaria	no	yes	no	very small flood areas	no	about the same	NA	unclear
2706	China	maybe	yes	maybe	water detected, but does not appear to be flood	no	std slightly bigger	no	yes
2707	Central African Republic	no	yes	no	water detected but only in rivers	yes	otsu slightly bigger	NA	unclear
2708	Iran	no	yes	no	only scattered water detected with otsu	yes	scattered otsu; much less std	no	yes
2709	Thailand	yes	no	yes		yes	std good, but otsu captures more areas	downstream	yes
2710	Vietnam	no	yes	no	too cloudy	NA		NA	dates after rain event
2711	China	yes	yes	yes		yes	otsu much bigger than std	no, but substantial flooding in adjacent watersheds	yes
2712	China	yes	no	no	only regular water detected; no obvious areas flooding	yes	otsu slightly bigger	no	yes
2713	Sierra Leone	maybe	yes	maybe	small flood areas in coastal wetlands	yes	only otsu gets significant water/flood	no	yes
2714	Romania	yes	no	maybe	only small flood areas detected	yes	more small areas with otsu than std	possibly downstream	yes
2715	Ethiopia	no	yes	no	only regular water detected	yes		NA	yes
2716	Switzerland	no	yes	no	only regular water detected	yes		no	yes
2717	Mexico	yes	no	yes		yes		no	yes
2718	India	yes	no	yes		yes	otsu much larger; probably not accurate	yes, downstream	dates are after main rain period
2719	USA	yes	no	yes		yes		no	yes
2720	Australia	yes	yes	yes		yes	slightly bigger	no	yes
2721	Nigeria	yes	no	yes		yes	much more flood with otsu	no	unclear; heavy rain continues after end date
2722	China, Taiwan	yes	yes	yes	only capturing coastal flooding in Taiwan	yes	slightly bigger	unclear	yes
2723	Japan, South Korea	no	yes	no	too cloudy	NA		no	yes
2724	France	yes	no	yes		yes	slightly bigger	no	close, main rains 2 days before event dates
2725	Cambodia, Vietnam	yes	no	yes		yes	25% bigger	no	yes
2726	China	yes	no	yes	we could see the agriculture area is in the floodplain area hence the otsu pickup as flood.	yes		yes	yes
2727	Afghanistan	no	yes	no	only river water detected, + scattered pixels (Otsu only)	yes	only otsu detects water	NA	main rain events 3-5 days earlier
2728	India	yes	no	yes		yes	50% bigger, but std still good	no	close, rain before and after
2729	Senegal	no	yes	no	cloudy? or too small	NA		NA	yes
2730	Philippines	yes	no	yes		yes	20% bigger	no	yes
2731	India	yes	no	yes		yes	substantially; unclear if real water	probably downstream	yes
2732	Vietnam	yes	no	yes		yes	much bigger; unclear if real	no	heaviest rains just before period
2733	Romania	yes	no	yes		no	basically the same	no	yes, roughly
2734	India	yes	no	yes		yes	25% bigger	yes, to west, but different watershed	yes
2735	USA	yes	no	yes		no	basically the same	no	yes
2736	China, Laos, Vietnam, Thailand	yes	yes	yes	very large region; unclear if detected floods are fragments or usefully representative of actual flooding	yes	much bigger	no	rains before and after period
2737	Nepal	yes	no	yes	perhaps the flood use to be in the floodplain area	yes		yes	yes
2738	Sudan	yes	no	no	only pick up few otsu layer	no		no	yes
2739	Nigeria	yes	no	no	not much floodings	yes	Otsu is a lot bigger than standard		no
2740	Mexico	yes	no	no	perhaps the flood use to be in the floodplain area			yes	yes
2741	Canada	no	no	no	flood likely too small / short lived	yes	only detecting normal water	no	yes, roughly
2742	Mauritania	maybe	yes	yes	few detected pixels, mostly along rivers / lakebeds	yes		maybe downstream	yes, but heavy rains before period also
2743	China	yes	no	yes		yes	Otsu cells are found around standard cells		yes
2744	El Salvador, Guatemala, Mexico	yes	yes	yes	only captures flood in Mexico/Veracruz	yes		no	yes
2745	China	yes	no	no	floodings are found in a lake or along rivers that are close to a little town	yes	more otsu cells are found in the river		yes
2746	China	yes	no	yes	some small flood areas captured; expect more	yes		possibly downstream	yes
2747	Bangladesh	yes	no	yes		yes	substantially bigger	yes, upstream, downstream, adjacent streams: much regional flooding	yes
2748	Vietnam	yes	yes	yes		yes		no	yes
2749	USA	no	yes	no	Very little flood detected; only small patch south of Hartford (adjacent to river)	yes		no	yes
2750	United Kingdom	yes	no	no	not much floodings	yse			no
2751	Spain	no	yes	no	no flood pixels detected	NA		NA	yes, but heavy rains also after
2752	Malaysia	yes	no	no	not much floodings	yes	no standard cells in the polygon		yes
2753	Caribbean: USA, Mexico, Cuba, Haiti, Jamaica	yes	yes	yes	Major flood detected only in USA/FL/Everglades. Likely cloud problems	yes		no	yes
2754	India, Bangladesh	yes	no	yes		yes		yes, upstream and adjacent	close; rains before flood period
2755	Italy	no	no	no	no flood pixels detected	NA		NA	yes
2756	Haiti	no	yes	no	no substantive flood areas detected	no			yes
2757	Vietnam	no	yes	no	few flood pixels detected; unclear if helpful or real	yes		no	yes, but heaviest rain after period
2758	India	yes	yes	yes		yes	much bigger	no	yes
2759	Honduras, NIcaragua	maybe	yes	no	small areas of flood but only in coastal wetlands	yes	slightly bigger	no	yes
2760	Vietnam	yes	no	yes		no	Otsu showing NO flood	no	yes
2761	Colombia	yes	no	yes		yes	standard slightly bigger	no	yes, but this is a very long period for a flood
2762	Australia	maybe	yes	no	Otsu shows large percentage of NSW underwater; std shows no real impact.	yes	orders of magnitude bigger; seems erroneous	unclear	yes
2763	France	yes	no	no	the otsu layer pick up irrigation as floos	yes		yes	yes
2764	United Kingdom	no	no	no	no flood detected	NA		no	no - highest rain a few days later
2765	Jamaica	no	no	no	no flood detected	NA		no	yes
2766	Vietnam	yes	no	no	not much floodings	yes			no
2767	Sri Lanka	no	no	no	no flood detected	NA		NA	yes
2768	Thailand, Malaysia	yes	yes	yes		yes		no	yes, but this is a VERY long period for a flood
2769	Albania	no	yes	no	no flood detected (few std pixels only)	no	few std pixels where no Otsu	no	rains heavier before flood period
2770	Vietnam	no	yes	no	just few flood pixels detected	yes		no	yes, but long period
2771	Canada	no	yes	no	no flood detected in polygon, but there is some to north and west	NA		no	yes
2772	Phillipines	no	no	no	not much floodings	no	Standard cells only		no
2773	Malawi, Mozambique	yes	no	yes		yes	coastal flood only with Otsu	no	yes, but very long flood period
2774	Western Sahara	maybe	yes	no	just few otsu flood pixels detected; unclear if real	yes		no	yes
2775	Congo Republic	no	yes	no	only flood detected in Congo river	yes	slightly bigger	no	yes
2776	USA	yes	no	yes		no	std bigger	no	yes
2777	Indonesia	no	yes	no	no flood detected; probably too cloudy	NA		no	yes
2778	Hungary	yes	no	no	the otsu pixels captured flood in the water body	no	less than standard	no	yes
2779	Indonesia	yes	no	yes		yes		yes, along coast	unclear
2780	Australia	yes	no	yes		yes	standard slightly bigger	no	yes
2781	Trinidad	no	no	no	no flood detected, probably too cloudy	NA		no	yes
2782	Guyana	yes	no	yes		yes			yes
2783	Namibia	no	yes	no	no flood detected	NA		no	yes
2784	Turkey, Greece	yes	no	yes		no	Std bigger	no	yes
2785	Philippines	yes	no	yes		no	Otsu not working	no	yes
2786	Bolivia	yes	no	yes		no	Otsu not working	no	yes
2787	Brazil	no	yes	no	no flood pixels detected	NA		NA	yes
2788	Indonesia	maybe	yes	no	only possible flood shows up outside DFO polygon, but still very small areas (to west, Surabaya area, and further west on Java)	yes		no	yes
2789	Indonesia	yes	no	yes		yes	slightly bigger	extends east along coast in Java	yes
2790	Norway	no	yes	no	no flood pixels detected	NA		NA	heavy rain 2 days later
2791	Fiji	no	yes	no	few flood pixels	yes		NA	yes
2792	Jordan	no	no	no	no flood pixels detected	NA		NA	yes
2793	Tanzania	no	no	no	few flood pixels showing, but only outside DFO polygon	yes	slightly	yes, up and downstream	yes
2794	Fiji	no	yes	no	no flood detected, except few coastal pixels	yes		NA	yes
2795	Papa New Guinea	yes	no	no	otsu captured in the water body	no		yes	yes
2796	Indonesia	yes	no	no	no otsu pixel	no		yes	yes
2797	Iraq	yes	no	no	not much floodings, found on dry land	no			no
2798	Malaysia, Thailand	yes	yes	yes		yes	50% bigger	no	yes
2799	Algeria	no	no	no	no flood detected	NA		no	yes
2800	Philippines	yes	yes	maybe	small flood areas along rivers detected	yes		no	yes
2801	Lesotho	no	no	no	no flood detected	NA		NA	yes
2802	Ecuador	yes	no	yes		yes		no	yes
2803	China	maybe	yes	yes	unclear to what extent flood (esp Otsu) is real vs snow or something else	yes	much bigger	no	unclear
2804	Yemen	no	no	no	no flood detected	NA		NA	yes
2805	Vietnam	yes	no	no	not much floodings	no			no
2806	Brazil	no	yes	no	No std flood detected; tons of Otsu, but clearly in error	yes	Otsu is very badly overpredicting water everywhere	unclear	yes
2807	Indonesia	no	yes	no	No significant flood pixels; only in coastal swamps	yes		no	yes
2809	Serbia	yes	no	no	not much floodings	no			yes
2810	Namibia	maybe	no	no	Otsi clearly overdetects, but may be detecting some pixels from the actual event. Std shows nothing.	yes	much bigger	no	yes
2811	Malaysia	no	no	no	no flood detected; likely flash flood and/or urban.	NA		no	yes
2812	Papua New Guinea	no	no	no	no flood detected	NA		no	yes
2813	Australia	no	yes	no	no flooding at news site; small flooding elsewhere, but looks like wetlands/normal	no		no	yes
2814	Philippines	no	no	no	no flood detected	NA		NA	yes, but heaviest rain 6 days later
2815	Australia	yes	no	yes		yes		yes, most flood is upstream from DFO polygon	No. Heavy rain before and after flood period, not during.
2816	Malawi	no	yes	no	no flood detected	no		no	yes
2817	Greece, Turkey	yes	no	yes		no		no	yes
2818	USA	yes	no	yes		yes	slightly	yes, much more flood to N and W of DFO polygon than within	yes
2819	Romania	maybe	yes	maybe	just few scattered pixels around AOI; unclear if real	yes	slightly	more flooding to west and east of DFO polygon	yes
2821	Australia	yes	no	yes		NA	Otsu not working	yes, upstream slightly	yes
2822	USA	no	yes	no	no flood detected	NA	Otsu not working	no	yes
2823	Colombia	yes	no	yes		yes	flood not very apparent with std; very clear with Otsu	yes, most flood outside AOI to NE or SW	yes
2824	Australia	no	no	no	flash flooding	NA		no	no, highest rainfall a few days later
2825	South Africa	yes	no	yes		yes	slightly bigger	extends west of AOI	yes
2826	Germany, Austria, Czechia	yes	no	no	otsu pick up the water body and irrigation area as flood	yes		yes	yes
2827	Slovakia, Hungary	yes	no	yes		no		unclear, lots of small flood areas regionally	yes
2828	Australia	yes	no	no	floodings found along coastlines	yes			yes
2829	USA, Canada	yes	yes	yes		no	Otsu smaller, but may be more accurate	no	yes
2830	Israel, Jordan	no	yes	no	no flood detected	NA		NA	unclear, a longer period may show more
2831	MISSING	MISSING	MISSING	MISSING	MISSING
2832	Serbia, Croatia	yes	no	yes		no		yes, downstream and upstream	yes
2833	Yemen	no	no	no	no flood detected	NA		NA	yes
2834	United States	Yes	No	Yes	None	No	None	No	Yes
2835	Israel	no	yes	no	no flood detected	NA		NA	yes
2836	Australia	yes	no	no	floods in the river and lakes	no			no
2837	Kenya	maybe	no	no	AOI is ENTIRE COUNTRY. There may be very small areas of flood in small areas, but not entire country. No clear flood patterns. flood pixels look more like noise / possibly cloud shadow.	yes		NA	yes
2838	DR Congo, R Congo	no	yes	no	no flood detected, just congo river	no		NA	unclear, constant rain
2839	Romania, Bulgaria	yes	no	yes		no		yes, upstream	yes
2840	Dominican Republic	no	no	no	no flood detected	NA		NA	yes
2841	Canada	yes	no	yes		NA	Otsu not working
2842	Brazil	yes	no	no	not much floods	no			yes
2843	Georgia	no	yes	no	no flood detected, probably too cloudy	NA		NA	yes
2844	India	yes	no	maybe	possible flooding, but may just be in coastal wetlands	yes	yes	no	yes
2845	Georgia	yes	no	no	otsu pickup flood in the water body	yes		yes
2846	Papua New Guniea	yes	no	no		yes			no
2847	Ethiopia	yes	no	no	floods on dryland or around lake	no			no
2848	Indonesia	yes	no	no	not much floods	yes			yes
2849	Canada	no	no	no	no flood detected	NA		no	yes
2850	Malaysia	no	no	no	no flood detected	NA		no	unclear
2851	Russia	yes	no	yes		yes	slightly	yes, downstream	unclear
2852	Canada	yes	no	yes		no	but std may be over-predicting	yes, upstream and adjacent	yes
2853	New Zealand	no	yes	no	no flood detected; possibly too cloudy	NA		NA	yes
2854	Papua New Guinea	no	yes	no	no flood detected; possibly too cloudy	NA		NA	yes
2855	Afghanistan	no	no	no	no flood detected; possibly too cloudy	NA		NA	yes
2856	Algeria	no	no	no	no flood detected; possibly too cloudy	NA		NA	no, heavy rain AFTER event dates
2857	Nepal	no	yes	no	no flood detected; possibly too cloudy	NA		NA	unclear
2858	Suriname	no	yes	no	only very few flood pixels detected; unclear if real	yes	otsu bigger, but only a few pixels total	no	unclear; steady rain over event dates
2859	Burma	yes	no	yes		yes	much bigger	yes, upstream	yes
2860	Iran	no	no	no	no flood detected	NA		NA	yes
2861	iran	yes	no	no	not much floods	no			yes
2862	Phillipines	yes	no	no	not much floods	yes			yes
2863	Tanzania	no	no	no	no flood detected	yes		no	yes
2864	USA	no	yes	no	no obvious flood detected over very large AOI	yes		no	yes
2865	China	no	yes	no	no flood detected; probably too cloudy	NA		NA	yes
2866	Afghanistan	no	yes	no	no flood detected; dates may be too late	NA		NA	no - heavy rain was a few days before marked event period
2867	Thailand	yes	no	yes		yes	much bigger	yes, downstream	yes
2868	Canada	no	yes	no	no flood detected; possibly too cloudy	NA		NA	yes
2869	Burundi	no	no	no	no flood detected; possibly too cloudy	NA		no	yes
2870	Cuba	no	yes	no	no flood detected; possibly too cloudy	NA		NA	no -heaviest rain several days earlier
2871	United States	yes	no	yes		yes			yes
2872	Morocco	no	no	no	no flood detected except few Otsu pixels not in reported locality	yes	only Otsu shows water	no	yes
2873	China	yes	no	no	otsu pick up at irrigation area	yes		yes	maybe
2874	United States	yes	no	no		yes			no
2875	thailand	yes	yes	no	otsu pick up at irrigation area	yes		yes	yes
2876	India	yes	no	no	otsu pick up at irrigation area	yes		yes	yes
2877	China	maybe	yes	no	no flood detected except possibly some coastal mudflats; likely too cloudy	NA	NA	NA	yes
2878	India	yes	no	no	otsu pick up at irrigation area	yes		yes	yes
2879	Bangladesh	yes	no	yes		yes	slightly bigger, possibly noise	yes, upstream into India	yes
2880	Canada	no	no	no	no flood detected, and AOI entirely in river floodplain.	NA		NA	unclear; chart not working
2881	United States	yes	no	no	not much floods	no			no
2882	Canada	yes	no	no		no	no standard pixels to compare	no	no
2883	United States	yes	no	no	otsu pickup flood in the water body	no		yes	yes
2884	Poland, Slovakia	no	no	no	no flood detected	yes	otsu bigger, but only detecting reference water	NA	yes
2885	China	no	yes	no	no flood detected (few pixels of otsu along rivers only)	yes	just a few pixels detected, no std	no	yes
2886	Taiwan	no	yes	no	no flood detected	NA		NA	heaviest rain a few days before
2887	China	no	yes	no	no flood detected; likely too cloudy	NA		NA	yes
2888	China	no	yes	no	no flood detected; likely too cloudy	NA		NA	yes
2889	China	no	yes	no	no flood detected; likely too cloudy	NA		NA	yes
2890	Indonesia	yes	yes	yes	flood detected but only along coast; too cloudy inland	yes	slightly bigger	no	yes
2891	Romania	no	no	no	no flood detected; unclear why	NA		NA	yes, but biggest rainfall earlier
2892	USA	no	no	no	no flood detected; unclear why	NA		NA	yes
2893	Indonesia	no	no	no	no flood detected; likely too cloudy	NA		NA	yes
2894	India	yes	yes	yes		yes	order of magnitude bigger; wholly unrealistic. Unclear where the truth is between std and otsu	yes, up and downstream	yes
2895	USA	no	yes	no	no flood detected; possibly too cloudy	NA		NA	yes
2896	Indonesia	yes	no	yes		yes	otsu better	yes, AOI misses flooding river to NW	yes
2897	China	no	yes	no	no flood detected; likely too cloudy, and very short period	NA		NA	yes
2898	China	no	yes	no	no flood detected; likely too cloudy, and very short period	NA		NA	yes, but rain over a much longer period than these 2 days
2899	Honduras	yes	no	maybe	small area of flooding detected, mostly with Otsu	yes	otsu bigger, probably better	no	yes, but rain over a much longer period than these 2 days
2900	China	yes	no	yes		unclear - std not working		yes, upstream	yes
2901	China	maybe	no	maybe	only Otsu shows flood water; unclear if real	yes	only otsu shows flood	yes, upstream on lake	yes
2902	Romania	no	yes	no	no flood pixels detected; possibly too cloudy	yes	yes, but only lakes showing	NA	yes
2903	China	no	no	no	no flood pixels; very small AOI	yes	yes, but only few pixels, mostly along coast	no	unclear; heavier rain before and after dates
2904	Turkey	no	no	no	no flood pixels	NA		NA	no; heavy rain event 4 days later
2905	Russia	no	no	no	no flood pixels	NA		NA	no; heavy rain event 4 days later
2906	China	maybe	no	maybe	few flood pixels, mostly just along lake borders = slightly overfull lakes. unclear if any real substantive flood detected	no		no	yes
2907	Afghanistan	no	no	no	no flood detected	NA		NA	unclear
2908	Pakistan	no	yes	no	no flood detected	NA		NA	no - heavy rain 5 days later
2909	India	maybe	no	maybe	only flood is few pixels along coast in city, but only Otsu; unclear if real.	yes	no std flood detected	no	yes
2910	India	maybe	no	maybe	only flood appears in river delta area, and only with Otsu	yes		no	yes
2911	China	yes	no	yes		yes	much bigger; no std flood	yes, adjacent areas S and W	yes
2912	Cambodia	maybe	yes	maybe	only flood along coastal wetland/rivers, and only Otsu	yes	no std flood; only otsu		unclear; even rainfall or higher before/after
2913	China	maybe	no	maybe	only flood along coastal bays, and almost entirely only with Otsu	yes	no std flood; only otsu	no	yes
2914	Vietnam	no	yes	no	no flood in AOI	NA		NA	unclear; not particularly higher rainfall during period
2915	Vietnam	no	no	maybe	no flood in AOI, but there is flood nearby by Otsu (but not std)	yes	much bigger	no, but may be flooding to the west, by Otsu, but not by std	unclear; not particularly higher rainfall during period
2916	Afghanistan	yes	no	yes		yes	much bigger; no flood with std; unclear if otsu is fully real	possibly upstream patch of flood	yes
2917	Pakistan	no	no	no	no flood detected; short period, probably cloud obscured	NA		no, but appears to be flooding 100 km east	yes
2918	Burma	yes	yes	maybe	only small areas detected, and only with Otsu	yes	no std water detected, only otsu	yes, upstream more flood	yes
2919	China	yes	no	yes		yes	no std water detected, only otsu	yes, upstream and downstream	unclear; heavy rain 3 days earlier
2920	Chile	no	no	no	only water detected is in rivers; possible bankside flooding, small scale	no	std bigger	no, but larger area of flood to west	yes
2921	China	yes	no	yes	likely useful in places, but AOI is huge, so may depend on location of interest	yes	much bigger	NA	yes
2922	Korea	no	yes	no	no flood detected; likely too cloudy	NA		NA	yes
2923	Russia	yes	no	yes		yes	slightly	no	unclear; large rain event 5 days earlier
2924	China	yes	no	yes	yes, but only Otsu gets flood	yes	much bigger; very little std flood	yes, upstream	yes
2925	Nigeria	no	yes	no	no flood detected; likely too cloudy	yes	only 5 otsu pixels detected	NA	yes
2926	Japan	no	yes	no	no flood detected; likely too cloudy	NA		NA	heaviest rain 2 days later
2927	China	maybe	yes	maybe	just few flood pixels detected, only by Otsu	yes	only Otsu detects any flood	no	yes
2928	Nigeria	no	yes	no	no flood detected; likely too cloudy or flashflood	NA		NA	yes
2929	Mauritania	maybe	yes	no	no flood detected	NA		NA	yes
2930	Japan	no	yes	no	no flood detected; possibly too cloudy	NA		NA	yes
2931	Pakistan	yes	no	yes		yes	much bigger; very little std flood; unclear which is real	yes, downstream	yes
2932	China	yes	no	maybe	most flood is shores of Poyang lake, but huge AOI without flood	yes		unclear	yes
2933	Switzerland	maybe	yes	no	no flood detected; possibly too cloudy	NA		NA	unclear; heavy rain event 4 days later
2934	USA	no	no	no	no flood detected	NA		NA	unclear; heavier rain immediately after
2935	India	yes	no	yes		yes		no	yes
2936	Afghanistan	maybe	yes	maybe	Otsu gets small area of likely flood, but much larger area of noise	yes	std gets no flood; otsu gets much (much false positive too)	unclear	yes
2937	Philippines	yes	no	maybe	small area of Otsu-only flood	yes	std gets no flood; small area of otsu flood	no	yes
2938	Pakistan	maybe	yes	no	no flood detected; 1-day event, hard to capture	NA		NA	yes, but only one day; rain occurring before and after
2939	USA, Mexico	maybe	yes	no	no flood detected	NA		NA	yes
2940	India	yes	no	yes		yes		no	yes
2941	China	yes	yes	maybe	std gets very little flood; Otsu gets much more; unclear which is real	yes	much bigger	no	yes
2942	South Africa	no	yes	no	no significant flood pixels; probably too cloudy	yes		no	yes
2943	Ethiopia	no	yes	no	no flood pixels at all	NA		NA	yes
2944	Somalia	no	no	no	a few flood pixels, but only in what is clearly wetlands (perhaps seasonal)	yes		no	yes
2945	China	maybe	no	maybe	large AOI; there may be some small areas of real flood, but no widespread flooding	yes		no	yes
2946	Ethiopia	no	no	no	only detected flooding is in wetlands at north end of lake Turkana.		OTSU not working	no	yes
2947	Mali, Niger, Burkina	yes	no	yes	only major flooding in inner Niger delta in Mali; possibly small-scale floods elsewhere		OTSU not working	no	yes
2948	Vietnam	yes	no	yes		yes		yes, up Mekong into Cambodia	yes
2949	Cambodia, Vietnam	yes	no	yes		yes		no	yes
2950	Ethiopia	No	No	No	No flooding	Does not exist	None	No	Yes
2951	Thailand, Vietnam	Yes	No	Yes		No	OTSU had an error-- layer did not load		Yes
2952	Uganda/Tananzia/Kenya	Yes	No	Yes		No	Same Size as STD	Most Flooding is northeast/southwest of DFO polygon	Yes
2953	United States (Alaska)	Yes	Yes	Maybe	Clouds obscure entire image	Yes	OTSU in some places that Standard is not	Yes, flood is southwest of the dfo polygon	Yes
2954	India/Nepal	Yes	No	Yes		Yes	OTSU continues more downstream than standard	Yes, most of flood is outside DFO polygon	Yes
2955	Somalia	Yes	No	Yes		No	OTSU had an error-- layer did not load	No	Yes
2956	India/Nepal	Yes	No	Yes		Yes	OTSU extends more downstream than STD	Yes, Flood continues both up and downstream	Yes
2957	China	Yes	No	Yes		No	OTSU and Standard around same size, just different pixels classified	Yes, Flood is mostly outside of the DFO polygon in the Yangtze	Yes
2958	Pakistan/Afghanistan	Yes	No	Yes		Yes	OTSU in same area as standard, just larger	Yes, Flood continues both up and downstream	Yes
2959	United States	Yes	No	Yes		Yes	OTSU in same area as standard, just larger	Yes, Flood is mostly outside of the DFO polygon	Yes
2960	Mexico	Yes	Yes	Maybe	Significand cloud cover	Yes	No Standard	Yes, Flood continues on the coast north and south	Yes
2961	India/Nepal	Yes	No	Yes		Yes	OTSU in same area as standard, just larger	Yes, Flood continues up and downstream	Yes
2962	Chad and Nigeria	yes	yes	no	otsu layer did not upload	no	otsu layer did not upload	no	yes
2963	Mexico	yes	no	yes	otsu pick up at irrigation area	yes		yes	yes
2964	Vietnam	yes	no	no	otsu pickup flood in the water body	yes		yes	yes
2965	India	yes	yes	no	otsu layer did not upload	no	otsu layer did not upload	no	no
2966	United States	yes	no	no	otsu pickup flood in the water body	yes		yes	yes
2967	Nigeria	yes	yes	no	no otsu pixels to compare	no		no	no
2968	Nepal	yes	no	no	otsu pick up at irrigation area	yes		yes	yes
2969	Philippines and Vietnam	yes	yes	no	otsu pick up flood in the water body and irrigation area	yes		yes	yes
2970	Myanmmar	yes	no	no	otsu pick up at irrigation area	yes		yes	no
2971	China	yes	no	no	few otsu pixels	no		yes	no
2972	Greece	yes	no	no	few otsu pixels	no	few otsu pixel to compare	no	yes
2973	United States	yes	no	no	otsu pick up snow as floods	no		no	yes
2974	Thailand	yes	no	no	otsu pick up at irrigation area	yes		yes	yes
2975	United States	yes	no	no	otsu pick up flood in the water body and irrigation area	yes		yes	yes
2976	Kenya	yes	no	no	otsu pickup flood in the water body	yes		yes	yes
2977	United States	yes	no	no	less otsu pixels to compare	no	less otsu pixels to compare	no	yes
2978	Spain	yes	no	no	no otsu pixels to compare	no	no otsu layer	no	yes
2979	Kenya	yes	yes	no	no otsu pixels to compare	no	no otsu layer	no	yes
2980	Malaysia	yes	no	no	otsu pick up flood in the water body and irrigation area	no		yes	yes
2981	Philippines	yes	no	no	otsu pick up flood irrigation area	no	otsu in the irrigationa area	yes	yes
2982	Mexico	yes	no	no	otsu pick up flood irrigation area	no		yes	yes
2983	United Kingdom	yes	no	no	otsu pick up flood irrigation area	no		yes	yes
2984	Sri Lanka	yes	no	no	otsu pick up flood in the water body and irrigation area	yes		yes	yes
2985	India	yes	no	no	otsu pick up flood in the water body and irrigation area	yes		yes	yes
2986	Ethopia	yes	no	no	otsu pick up flood in the water body	no		no	yes
2987	Turkey	yes	no	no	otsu pick up flood in the water body	yes		yes	yes
2988	Philippines	yes	no	no	otsu pick up flood irrigation area	yes		yes	yes
2989	Iraq	yes	no	no	otsu pick up flood in the water body	no	same	yes	yes
2990	United States	yes	no	no	otsu pick up flood in the water body and irrigation area	no	same	yes	yes
2991	Republic of the Congo	yes	no	no	otsu pickup flood in the water body	yes		yes	yes
2992	Afghanistan	yes	no	no	otsu pickup flood in the water body	yes		yes	yes
2993	democratic republic of congo	yes	no	no	barely have otsu pixel	no		no	no
2994	Afghanistan	yes	no	no	no otsu pixels to compare	no		no	yes
2995	Afghanistan	yes	no	yes	but its scaterring	yes		no	yes
2996	Afghanistan	yes	no	no	but its scaterring	no		no	yes
2997	Panama	yes	no	no	otsu pickup flood in the water body	no	less than	yes	yes
2998	republic of the Congo	yes	no	no	otsu pickup flood in the water body	yes		yes	yes
2999	Malawi	yes	yes	no	no otsu and standard layer	no		no	no
3000	Haiti	yes	yes	no	otsu pickup flood in the water body	yes		yes	yes
3001	Rwanda	yes	no	no	no otsu and standard layer	no		no	yes
3002	Cambodia and Philippine	yes	yes	yes	otsu pick up flood in the water body and irrigation area	yes		yes	yes
3003	pakistan	yes	no	no	otsu was scattering	no		no	maybe
3004	Sri Lanka	yes	no	yes	otsu pickup flood in the water body	yes		yes	yes
3005	Malaysia	yes	no	no	otsu pickup flood in the water body	yes		yes	yes
3006	indonesia	yes	no	no	no otsu layer to compare	no		no	yes
3007	Peru	yes	no	yes	otsu pick up flood in the water body	yes		yes	yes
3008	philippines	yes	yes	no	otsu pick up flood in the water body	yes		yes	yes
3009	Yemen	yes	yes	no	no otsu layer to compare	no		no	yes
3010	Brazil	yes	no	no	no otsu layer to compare	no		no	yes
3011	mozambique	yes	no	no	otsu layer pick up flood at irrigation area	yes		yes	yes
3012	Malaysia	yes	yes	no	barely have otsu and standard layer	no		no	yes
3013	Tanzania	yes	yes	no	otsu layer did not load	no		no	maybe
3014	Philippines	yes	no	yes	otsu layer pick up flood at irrigation area	yes		yes	yes
3015	indonesia	yes	no	no	otsu pick up flood in the water body	yes		yes	yes
3016	Sri Lanka	yes	no	yes	otsu pickup flood in the water body	yes		yes	yes
3017	Malaysia	yes	yes	no	barely have otsu layer	no		no	yes
3018	Bolivia	yes	yes	no	no otsu layer to compare	no		no	maybe
3019	Bolivia	Yes	No	Ye	None	Does not exist	None	No	Yes
3020	United States	yes	no	no	otsu pick up flood in the water body and irrigation area	yes		yes	yes
3021	Australia	yes	no	no	otsu pick up flood in the water body	yea	about the same	yes
3022	Angola	yes	no	no	otsu pick up flood in the water body	yes	less	yes	no
3023	Zambia	yes	no	no	otsu pick up flood in the water body	yes	less	yes	no
3024	Peru	yes	no	no	no otsu pixels to compare	no		no	maybe
3025	Australia	yes	no	maybe	otsu and standard pick up floods maybe in the wet area	yes		yes	yes
3026	Argentina	yes	no	no	otsu pick up flood in the water body and irrigation area	yes		yes	yes
3027	indonesia	yes	no	no	otsu pick up flood in the water body and irrigation area	yes		yes	yes
3028	Rwanda	yes	no	no	no otsu and standard layer	no		no	yes
3029	Fiji	yes	yes	no	barely have otsu pixels	no		no	maybe
3030	Madagascar	yes	no	no	otsu pick up flood in the water body	yes		yes	yes
3031	indonesia	yes	yes	no	no otsu and standard layer	no		no	yes
3032	Australia	yes	no	no	otsu pick up flood in the water body	yes		yes	yes
3033	South Africa	yes	no	no	otsu pick up flood in the water body	yes		yes	yes
3034	Honduras	yes	no	no	otsu pick up flood in the water body and irrigation area	yes		yes	yes
3035	Algeria	yes	no	no	barely have otsu pixels	no		no	maybe
3036	Fiji	yes	yes	no	barely have otsu pixels	no		no	maybe
3037	United States	yes	no	no	otsu pick up flood in the water body and irrigation area	yes		yes	yes
3038	Madagascar	yes	no	no	otsu pick up flood in the water body and irrigation area	yes		yes	yes
3039	Honduras	yes	no	no	barely have otsu and standard pixels	no		no	yes
3040	Afghanistan	yes	no	no	otsu pick up flood in the water body	yes		yes	maybe
3041	Indonesia	yes	no	no	otsu pick up flood in the water body and irrigation area	yes		yes	yes
3042	India	yes	no	no	otsu pick up flood in the snow and irrigation area	no		yes	yes
3043	Yemen	yes	yes	no	have no otsu, standard and permanent water pixels to compare	no		no	yes
3044	Argentina and Uruguay	yes	no	no	otsu pick up flood in the water body and irrigation area	no		yes	yes
3045	Haiti	yes	no	no	otsu pick up flood in the water body	no		yes	yes
3046	New Zealand	yes	no	no	otsu pick up flood in the water body and irrigation area	yes		yes	yes
3047	Spain	yes	no	no	have no otsu pixels to compare	no		no	maybe
3048	Canada	yes	no	no	otsu pick up flood in the water body	yes		yes	yes
3049	Algeria	yes	no	no	barely have otsu pixels	no		no	maybe
3050	Thailand	yes	yes	no	only have 1 otsu pixel	no		no	yes
3051	Indonesia	yes	no	no	otsu pick up flood in the water body	no		yes	yes
3052	United States	yes	no	no	.otsu in the water body	no	about the same	yes	yes
3053	indonesia	yes	no	no	otsu pick up flood in the irrigation area	yes		yes	yes
3054	Tajikistan	yes	no	no	otsu pick up flood in the water body	no	about the same	yes	yes
3055	Afghanistan	yes	no	yes		yes	almost no standard	yes	yes
3056	Indonesia	no	yes	no	no flood	no otsu	no standard		yes
3057	Kyrgyzstan	yes	yes	somewhat	very little flood that's not permanent water	no	exact same	yes	yes
3058	China	yes	no	yes		yes	otsu a little bigger	yes	yes
3059	Uganda, Kenya	no	yes	no	no flood	no otsu	no standard		yes
3060	Morocco	no	yes	no	no flood	no otsu	no standard		yes
3061	Afghanistan	yes	no	yes		yes	no standard	yes	yes
3062	Colombia	no	yes	no	no flood	no otsu	no standard		yes
3063	Turkey	yes	yes	no	no flood that's not permanent water	yes	no standard		yes
3064	Syria	no	yes	no	no flood	no otsu	no standard		yes
3065	Indonesia	yes	no	yes		yes	otsu extends standard	yes	yes
3066	Thailand	yes	no	somewhat	spec of flood	yes	no standard	no - random pattern	yes
3067	Sri Lanka	yes	no	yes		yes	almost no standard	yes	yes
3068	Myanmar	yes	no	yes		yes	otsu extends standard	yes	yes
3069	Afghanistan	no	yes	no	no flood	no otsu	no standard		yes
3070	United States	yes	no	yes		yes	otsu extends standard	yes	yes
3071	Uruguay	yes	no	yes		yes	almost the same	yes	yes
3072	Indonesia	yes	yes	no	no flood that's not permanent water	no	exact same		yes
3073	Thailand	yes	no	yes		yes	otsu extends standard	yes	yes
3074	Jordan	yes	yes	no	no flood that's not permanent water	no	exact same		yes
3075	Russia	yes	no	yes		yes	no standard	yes	yes
3076	Russia	yes	no	yes		yes	otsu extends standard	yes	yes
3077	Afghanistan	yes	no	somewhat	spec of flood	yes	no standard	no - random pattern	yes
3078	Kenya	yes	no	yes		yes	otsu extends standard	yes	yes
3079	China	yes	no	yes		yes	no standard	no - random pattern	yes
3080	Colombia	yes	no	yes		yes	otsu extends standard	yes	yes
3081	Indonesia	yes	no	yes		yes	otsu extends standard	yes	yes
3082	Spain	yes	yes	somewhat	little flood that's not permanent water	yes	otsu extends standard	yes	yes
3083	United States	yes	no	yes		yes	almost no standard	no - random pattern	yes
3084	China	yes	yes	yes		yes	no standard	yes	yes
3085	Bulgaria	yes	no	yes		yes	otsu extends standard	yes	yes
3086	France	no	yes	no	no flood	no otsu	no standard		yes
3087	Cuba	yes	yes	somewhat	little flood that's not permanent water	yes	otsu extends standard	yes	yes
3088	Turkey	yes	yes	no	no flood that's not permanent water	no	exact same		yes
3089	Dominican Republic	yes	no	yes		yes	otsu extends standard	yes	yes
3090	El Salvador	yes	yes	no	no flood that's not permanent water	yes	almost no standard		yes
3091	China	yes	yes	somewhat	spec of flood	yes	otsu extends standard	yes	yes
3092	Canada	yes	no	yes		yes	otsu extends standard	yes	yes
3093	Iran	yes	yes	somewhat	spec of flood	no otsu	spec of standard	no - random pattern	yes
3094	China	yes	yes	yes		otsu layer did not load	standard extends permanent water	yes	yes
3095	Australia	yes	no	yes		yes	otsu extends standard	yes	yes
3096	Switzerland	no	yes	no	no flood	no otsu	no standard		yes
3097	Bangladesh	yes	no	yes		yes	otsu extends standard	yes	yes
3098	South Africa	yes	no	yes		yes	otsu extends standard	yes	yes
3099	United Kingdom	yes	no	yes		yes	no standard	no - random pattern	yes
3100	Nepal	yes	no	yes		yes	almost no standard	yes	yes
3101	Pakistan	yes	no	yes		yes	no standard	yes	yes
3102	United States	yes	yes	no	no flood that's not permanent water	yes	otsu extends standard		yes
3103	Indonesia	yes	no	yes		no	exact same	yes	yes
3104	India	yes	no	yes		yes	otsu extends standard	yes	yes
3105	Costa Rica	no	yes	no	no flood	no otsu	no standard		yes
3106	United States (New York)	yes	yes	somewhat	little flood that's not permanent water	yes	otsu extends standard	yes	yes
3107	India	yes	no	yes		yes	no standard	yes	yes
3108	India	yes	yes	no	no flood that's not permanent water	yes	no standard		yes
3109	Afghanistan	yes	no	yes		yes	almost no standard	no - random pattern	yes
3110	United Kingdom	yes	no	yes		yes	no standard	no - random pattern	yes
3111	Solomon Islands	no	yes	no	no flood	no otsu	no standard		yes
3112	Pakistan	yes	no	yes		yes	otsu extends standard	yes	yes
3113	United States	yes	yes	yes		yes	otsu extends standard	yes	yes
3114	Australia	yes	no	yes		yes	otsu extends standard	yes	yes
3115	Iran	yes	no	yes		yes	no standard	yes	yes
3116	Pakistan	yes	no	yes		yes	otsu extends standard	yes	yes
3117	Vietnam	no	yes	no	no flood	no otsu	no standard		yes
3118	India	yes	no	yes		yes	otsu extends standard	yes	yes
3119	India	yes	no	yes		yes	no standard	no - random pattern	yes
3120	India	yes	no	yes		yes	otsu a lot bigger	yes	yes
3121	Colombia	yes	yes	somewhat	little flood that's not permanent water	no otsu	standard extends permanent water	yes	yes
3122	India	yes	yes	yes		otsu layer did not load	standard extends permanent water	yes	yes
3123	Sudan, South Sudan	yes	yes	yes		otsu layer did not load	standard extends permanent water	yes	yes
3124	Japan	no	yes	no	no flood	no otsu	no standard		yes
3125	Myanmar	yes	no	yes		yes	otsu extends standard	yes	yes
3126	Ethiopia	yes	yes	no	no flood that's not permanent water	yes	almost the same		yes
3127	New Zealand	yes	no	yes		yes	otsu extends standard	yes	yes
3128	India	yes	yes	yes		otsu layer did not load	standard extends permanent water	yes	yes
3129	Japan	yes	yes	no	no flood that's not permanent water	yes	no standard		yes
3130	Afghanistan	no	yes	no	no flood	no otsu	no standard		yes
3131	India	no	yes	no	no flood	no otsu	no standard		yes
3132	China	yes	no	yes		yes	otsu extends standard	yes	yes
3133	China	yes	yes	no	no flood that's not permanent water	no otsu	standard extends permanent water		yes
3134	China	yes	no	yes		yes	otsu extends standard	no - random pattern	yes
3135	Indonesia	no	yes	no	no flood	no otsu	no standard		yes
3136	Bangladesh	yes	yes	yes		otsu layer did not load	standard extends permanent water	yes	yes
3137	United Kingdom	yes	no	yes		yes	otsu extends standard	yes	yes
3138	Tajikistan	no	yes	no	no flood	no otsu	no standard		yes
3139	Indonesia	no	yes	no	no flood	no otsu	no standard		yes
3140	Haiti	no	yes	no	no flood	no otsu	no standard		yes
3141	Indonesia	yes	no	yes		yes	almost no standard	no - random pattern	yes
3142	Russia	yes	yes	somewhat	little flood that's not permanent water	yes	almost the same	yes	yes
3143	Nepal	yes	no	yes		yes	almost no standard	yes	yes
3144	South Africa	yes	no	yes		yes	otsu extends standard	no - random pattern	yes
3145	Burkina Faso	yes	no	yes		yes	no standard	yes	yes
3146	Ethiopia	yes	yes	yes		otsu layer did not load	standard extends permanent water	yes	yes
3147	Canada (Newfoundland)	yes	yes	no	no flood that's not permanent water	yes	no standard		yes
3148	Nigeria	no	yes	no	no flooding	no	no otsu cells within polygon		no
3149	Vietnam	yes	no	yes	decent amount of flooding despite being cloudy	yes	otsu picked up flooding that standard did not	no - random pattern	yes
3150	India	yes	no	yes	decent amount of flooding despite being cloudy	no	no otsu cells within polygon		yes
3151	Nigeria	yes	yes	yes	decent flooding	no	otsu failed to load		yes
3152	Bulgaria, Romania	yes	no	maybe	some flooding despite being cloudy	yes	otsu slightly larger than standard	yes	yes
3153	Mauritania	yes	no	yes	some scattered flooding	yes	otsu picked up flooding that standard did not	no - random pattern	yes
3154	Indonesia	yes	no	no	very little flooding on coasts	no	little difference		no
3155	Canada	yes	no	no	very little flooding	yes	otsu picked up flooding that standard did not	no - random pattern	no
3156	France, Germany, Switzerland	yes	no	no	cloudy and not much flooding	yes	otsu picked up flooding that standard did not	no - random pattern	yes
3157	Philippines	yes	no	no	no flooding	no	no otsu cells within polygon		yes
3158	Tasmania	yes	no	maybe	cloudy but decent flooding detected	yes	otsu picked up flooding that standard did not	no - random pattern	no
3159	North Korea	yes	no	maybe	cloudy but decent flooding detected	yes	otsu larger than standard	no - random pattern	no
3160	India	yes	no	yes	lots of flooding detected	yes	otsu larger than standard	no - random pattern	no
3161	China	yes	no	yes	good flooding	yes	otsu larger than standard	no - random pattern	yes
3162	Pakistan	yes	no	yes	lots of flooding detected	yes	otsu larger than standard	yes	no
3163	Papua New Guinea	yes	yes	no	very little flooding detected	yes	otsu picked up flooding that standard did not	yes	yes
3164	India	yes	no	yes	good flooding	yes	otsu larger than standard	no - random pattern	yes
3165	India	yes	no	yes	lots of scattered flooding	yes	otsu larger than standard	no - random pattern	yes
3166	Ghana, Mali, Togo, Burkina Faso, Benin	yes	yes	yes	lots of flooding	no	otsu failed to load		yes
3167	Chad	yes	no	yes	lots of flooding	yes	otsu larger than standard	no - random pattern	yes
3168	Cambodia	yes	no	yes	lots of flooding	yes	otsu slightly larger than standard	yes	no
3169	Myanmar	yes	no	yes	lots of flooding	yes	otsu slightly larger than standard	yes	yes
3170	Uganda, Kenya	yes	no	yes	good flooding detected	no	about the same	no - random pattern	yes
3171	United States	yes	no	yes	lots of scattered flooding	no	about the same	no - random pattern	yes
3172	Dominica, Martinique, St. Lucia	yes	no	maybe	some coastal flooding but not much	yes	otsu picked up flooding that standard did not	no - other	yes
3173	China	yes	no	maybe	decent flooding detected despite being cloudy	yes	otsu picked up flooding that standard did not	no - random pattern	yes
3174	Thailand	yes	no	maybe	some flooding despite being cloudy	yes	otsu picked up flooding that standard did not	no - looks more like a reservoir or lake	no
3175	Yemen	no	yes	no	no flooding	no	no flooding detected		yes
3176	China	yes	no	maybe	some flooding despite being cloudy	yes	otsu picked up flooding that standard did not	no - random pattern	no
3177	Liberia	no	yes	no	no flooding	no	no flooding detected		no
3178	Romania	yes	no	maybe	cloudy but some flooding	no	no otsu cells within polygon despite loading	no - looks more like a reservoir or lake	yes
3179	Chad	yes	no	yes	great flood	yes	otsu much larger than standard	yes	yes
3180	Senegal, Mauritania	yes	no	yes	good flooding	yes	otsu picked up flooding that standard did not	no - random pattern	no
3181	China	yes	no	maybe	cloudy but some flooding	yes	otsu picked up flooding that standard did not	no - random pattern	yes
3182	Indonesia	yes	no	maybe	some coastal flooding but not much	yes	otsu picked up flooding that standard did not	no - other	yes
3183	Somalia	yes	no	yes	some flooding	yes	otsu picked up flooding that standard did not	no - random pattern	yes
3184	Mexico, Honduras, Guatemala, Nicaragua	yes	no	yes	good flooding	yes	otsu slightly larger than standard	no - random pattern	no
3185	South Korea	yes	no	no	otsu cells only at coast	no	otsu picked up flooding that standard did not	no - other	no
3186	Romania	yes	no	maybe	decent flooding	yes	otsu picked up flooding that standard did not	no - looks more like a reservoir or lake	yes
3187	Austria	yes	no	no	cloudy and almost no flooding	yes	otsu slightly larger than standard	no - random pattern	yes
3188	Thailand	yes	no	yes	great flood	yes	otsu slightly larger than standard	yes	yes
3189	Rwanda	no	yes	no	no flooding	no	no flooding detected		no
3190	South Korea	yes	no	no	cloudy and otsu cells at coast	yes	otsu picked up flooding that standard did not	no - other	no
3191	India	yes	no	yes	good flooding	yes	otsu picked up flooding that standard did not	no - random pattern	yes
3192	Japan, North Korea	yes	no	maybe	decent flooding despite being cloudy	yes	otsu slightly larger than standard	no - random pattern	no
3193	Slovenia	yes	no	yes	decent flooding around lakes/reservoirs	yes	otsu slightly larger than standard	no - looks more like a reservoir or lake	yes
3194	Guatemala	no	yes	no	no flooding	no	no flooding detected		no
3195	India	yes	no	yes	great flood	yes	otsu slightly larger than standard	yes	no
3196	Costa Rica	yes	no	no	only otsu cells along coast	yes	otsu picked up flooding that standard did not	no - other	yes
3197	Algeria	yes	no	yes	good flooding detected	no	not much difference	no - looks more like a reservoir or lake	yes
3198	Brazil	yes	no	yes	great flood	no	not much difference	yes	no
3199	Mexico	yes	no	yes	good flooding	yes	otsu slightly larger than standard	yes	yes
3200	Vietnam	yes	no	maybe	cloudy but some flooding	yes	otsu picked up flooding that standard did not	no - random pattern	yes
3201	Algeria	no	yes	no	no flooding	no	no flooding detected		no
3202	Taiwan	yes	no	maybe	coastal flooding but very cloudy	yes	otsu slightly larger than standard	no - other	yes
3203	Cuba, Haiti	yes	no	maybe	scattered flooding but cloudy	yes	otsu slightly larger than standard	no - random pattern	yes
3204	Spain	yes	no	maybe	scattered flooding but cloudy	yes	otsu picked up flooding that standard did not	no - random pattern	no
3205	El Salvador, Honduras, Panama, Nicaragua, Coasta Rica	yes	no	yes	cloudy but good flooding	no	little difference	no - other	no
3206	Tunisia	yes	no	maybe	some flooding around lakes/reservoirs	yes	otsu slightly larger than standard	no - looks more like a reservoir or lake	yes
3207	Vietnam	yes	no	maybe	cloudy and little flooding	yes	otsu picked up flooding that standard did not	no - random pattern	no
3208	India	yes	no	yes	good flooding	yes	otsu larger than standard	no - random pattern	no
3209	Indonesia	yes	no	no	very little flooding detected	yes	otsu slightly larger than standard	no - other	yes
3210	Cambodia, Vietnam	yes	no	yes	very large flood	no	little difference	yes	no
3211	Thailand	no	yes	no	no flooding	no	no flooding detected		yes
3212	Colombia	yes	yes	yes	lots of flooding	no	otsu failed to load		yes
3213	Brazil	yes	no	no	cloudy and very little flooding	yes	otsu picked up flooding that standard did not	no - random pattern	no
3214	Republic of the Congo, Democratic Republic of the Congo	yes	no	yes	decent flooding despite being cloudy	yes	otsu larger than standard	yes	yes
3215	Vietnam	yes	no	no	cloudy and very little flooding	yes	otsu picked up flooding that standard did not	yes	no
3216	Philippines	yes	no	yes	lots of flooding	yes	otsu larger than standard	no - random pattern	no
3217	India	yes	no	yes	lots of flooding despite being very cloudy	yes	otsu much larger than standard	no - other	yes
3218	Cuba, Haiti, Dominican Republic, Jamaica	yes	no	yes	cloudy but lots of scattered flooding	yes	otsu picked up flooding that standard did not	no - random pattern	yes
3219	Vietnam	yes	no	yes	cloudy but lots of flooding	yes	otsu larger than standard	no - other	yes
3220	Mexico	yes	no	yes	great flood	no	not much difference	no - random pattern	yes
3221	Algeria	yes	no	yes	decent flooding	yes	otsu picked up flooding that standard did not	no - looks more like a reservoir or lake	no
3222	Philippines	no	yes	no	no flooding	no	no otsu within polygon		yes
3223	Somalia	no	yes	no	no flooding	no	no otsu within polygon		no
3224	Vietnam	yes	no	no	cloudy and very little flooding	yes	otsu picked up flooding that standard did not	no - random pattern	no
3225	Papua New Guinea	yes	no	no	cloudy but some scattered flooding detected	yes	otsu picked up flooding that standard did not	no - random pattern	yes
3226	Bangladesh	yes	no	yes	lots of flooding	yes	otsu picked up flooding that standard did not	yes	yes
3227	Uganda	no	yes	no	no flooding	no	no flooding detected		yes
3228	Bulgaria, Greece, Turkey	yes	no	maybe	cloudy but some scattered flooding detected	yes	otsu slightly larger than standard	no - random pattern	yes
3229	Philippines	no	yes	no	no flooding	no	no flooding detected		no
3230	Malawi. Mozambique	no	yes	no	no flooding	no	no flooding detected		no
3231	South Africa	yes	no	maybe	scattered flooding but cloudy	yes	otsu picked up flooding that standard did not	no - random pattern	yes
3232	Philippines	yes	no	maybe	scattered flooding but cloudy	yes	otsu picked up flooding that standard did not	no - random pattern	no
3233	Algeria	yes	no	maybe	scattered flooding but cloudy	yes	otsu picked up flooding that standard did not	no - random pattern	yes
3234	Serbia, Montenegro	yes	no	no	cloudy and not much flooding	no	not much difference	no - random pattern	no
3235	Kenya	yes	no	yes	good amount of scattered flooding	yes	otsu picked up flooding that standard did not	no - random pattern	yes
3236	United States	yes	no	maybe	some flooding despite being cloudy	yes	otsu picked up flooding that standard did not	no - random pattern	yes
3237	Australia	yes	no	yes	scattered flooding detected	no	not much difference	no - random pattern	no
3238	Malaysia	yes	no	maybe	cloudy but decent flooding detected	yes	otsu larger than standard	no - random pattern	no
3239	Haiti, Dominican Republic	yes	no	yes	cloudy but good flooding	no	little difference	no - looks more like a reservoir or lake	yes
3240	Kenya	yes	no	maybe	lots of small scattered flooding	yes	otsu picked up flooding that standard did not	no - random pattern	no
3241	Zimbabwe	no	no	no	no standard or otsu cells inside polygon	no	no standard/otsu		yes
3242	Mozambique, Malawi	yes	no	yes		no	standard slightly bigger		no
3243	Sri Lanka	yes	no	yes		yes	otsu slightly bigger than standard		no
3244	Indonesia	yes	no	maybe	floodings found in a lake	yes	otsu slightly bigger than standard		no
3245	Zimbabwe,Mozambique	yes	no	maybe	not much floodings	yes	more otsu cells found in the river and farmlands		yes
3246	Bolivia	yes	no	yes		yes	significant amount of otsu cells are found		no
3247	Australia	yes	no	yes		yes	significant amount of otsu cells are found		no
3248	Indonesia	yes	no	no	measuring permanent water	yes	more otsu cells are found along coastline		no
3249	Indonesia	yes	no	yes		yes	more otsu cells are found in towns		no
3250	Zambia	yes	no	no	measuring permanent water	no			no
3251	Indonesia	yes	no	yes		yes	more otsu cells are found around standard cells		no
3252	Australia	yes	no	yes	floodings are found next to towns	yes	significant amount of otsu cells are found		yes
3253	United States	yes	no	no	not much floodings	no	no otsu inside polygon		no
3254	Sri Lanka	yes	no	yes		yes	significant amount of otsu cells are found		yes
3255	United States	yes	no	no	measuring permanent water	no			yes
3256	Brazil	yes	no	yes		yes	significant amount of otsu cells are found		no
3257	Australia	yes	no	yes		yes	significant amount of otsu cells are found		yes
3258	Afghanistan	no	no	no	measuring permanent water	no	no standard/otsu		no
3259	United Kingdom	yes	no	yes		yes	otsu slightly bigger		no
3260	South Africa	yes	no	no	not much floodings	yes	more otsu cells		no
3261	Argentina, paraguay	yes	no	no	not much floodings	no	no otsu		no
3262	Indonesia	yes	no	no	not much floodings	no	no otsu		no
3263	Ecuador	yes	no	yes		yes	more otsu cells are found around standard cells		no
3264	Namibia,Angola	yes	no	no	not much floodings	no	no otsu		no
3265	Indonesia	no	no	no	measuring permanent water	no	no otsu/standard		no
3266	Brazil	no	no	no	measuring permanent water	no	no otsu/standard		no
3267	Peru	yes	no	yes		no	no otsu		yes
3268	United States	yes	no	yes		no	more standard cells are found in river		yes
3269	Indonesia	no	no	no	measuring permanent water	no	no otsu/standard		no
3270	Australia	yes	no	yes		yes	significant amount of otsu cells are found		no
3271	Indonesia	yes	no	yes		yes	more otsu cells are found around standard cells		yes
3272	Angola,Zambia	yes	no	yes		no	no otsu		yes
3273	Phillipines	yes	no	yes		yes	significant amount of otsu cells are found		no
3274	Madagascar	yes	no	yes		yes	more otsu cells are found around standard cells		no
3275	China, Russia	yes	no	no	not much floodings	yes	more otsu cells are found around standard cells		no
3276	Indonesia	yes	no	no	not much floodings	yes	significant amount of otsu cells are found		no
3277	Kazakstan	yes	no	no	floodings found in lake	no			yes
3278	Iran, Pakistan	yes	no	no	not much floodings	yes	significant amount of otsu cells are found		no
3279	Morocco	yes	no	yes		yes	significant amount of otsu cells are found		no
3280	Indonesia	yes	no	yes		yes	significant amount of otsu cells		yes
3281	Malaysia	yes	no	no	not much floodings	yes	significant amount of otsu cells		no
3282	China	yes	no	yes		yes	significant amount of otsu cells		no
3283	Colombia	yes	no	no	not much floodings	yes	more otsu around standard		no
3284	Sri Lanka	yes	no	no	not much floodings	yes	otsu slightly bigger		yes
3285	United States	yes	no	yes		no	no otsu		no
3286	India	yes	no	no	not much floodings	yes	otsu slightly bigger		no
3287	Kenya	yes	no	yes	a lot of floodings	yes	significant amount of otsu cells		yes
3288	Malaysia	yes	no	no	not much floodings	yes	otsu slightly bigger		no
3289	Tanzania	yes	no	no	not much floodings	yes	otsu slightly bigger		yes
3290	Kenya	yes	no	no	not much floodings	no			no
3291	Brazil	yes	no	yes	lots of scattered flooding	yes	otsu picked up flooding that standard did not	no - random pattern	yes
3292	Canada	yes	no	maybe	lots of small scattered flooding	no	standard picks up more flooding than otsu	no - looks more like a reservoir or lake	yes
3293	Kenya	no	yes	no	no flooding	no	no otsu within polygon		yes
3294	Tanzania	yes	no	yes	good flooding along river	yes	otsu bigger than standard	yes	yes
3295	China	yes	no	maybe	some flooding but cloudy	yes	otsu picked up flooding that standard did not	yes	no
3296	Indonesia	no	yes	no	no flooding	no	no otsu within polygon		yes
3297	Australia	yes	no	yes	good flooding	no	about the same	yes	yes
3298	Canada	yes	no	yes	good flooding detected	yes	otsu picked up flooding that standard did not	no - random pattern	no
3299	Sri Lanka	yes	no	no	cloudy and very little flooding	yes	otsu picked up flooding that standard did not	no - random pattern	yes
3300	United States, Canada	yes	no	yes	good flooding	no	about the same	no - looks more like a reservoir or lake	yes
3301	China	yes	no	yes	good flooding despite being somewhat cloudy	yes	otsu much larger than standard	yes	no
3302	Myanmar	yes	no	yes	good flood	yes			maybe
3303	Algeria	yes	no	no	over permwater	yes			no
3304	Vietnam	yes	no	no	marginal	yes			yes
3305	Philippines	yes	no	yes	some flooding near farm/river	yes			yes
3306	Russia	yes	no	yes	river	yes			no
3307	Philippines	yes	yes	maybe	mostly over the city of Dagupan	yes			yes
3308	Chile	yes	no	maybe	marginal floods near rivers	maybe	half half		yes
3309	China	yes	no	maybe	near city and roads	yes			yes
3310	Ethiopia	No	No	Yes	Does not exist	Does not exist	None	No	Does not exist
3311	India	yes	no	yes	large flood around river	yes			yes
3312	India	yes	no	yes	otsu pickup flood in water body and irrigation area	yes		yes	yes
3313	United States	yes	no	no	otsu pickup flood in water body and irrigation area	no	same	yes	no
3314	Sri Lanka	yes	no	maybe	otsu pickup flood in water body and irrigation area	yes		yes	maybe
3315	Switzerland, Germany and France	yes	no	no	otsu pickup flood in water body and irrigation area	no	same	yes	no
3316	Belize	yes	no	no	otsu in the water body	no	same	yes	no
3317	United States	yes	no	no	otsu pickup flood in irrigation area	yes		yes	no
3318	Bangladesh	yes	no	no	otsu pickup flood in water body and irrigation area	yes		yes	maybe
3319	China	yes	no	no	otsu pickup flood in water body and irrigation area	yes		yes	no
3320	Philippines	yes	no	no	otsu in the water body	no		yes	yes
3321	Kenya	yes	no	no	otsu in the water body	yes		yes	yes
3322	Bangladesh	yes	no	no	otsu pickup flood in water body and irrigation area	yes		yes	no
3323	South Africa	yes	no	yes		yes	almost the same	yes	yes
3324	Suriname	no	yes	no	no flood	no otsu	no standard		yes
3325	China	yes	no	yes		yes	otsu extends standard	yes	yes
3326	Japan	yes	yes	no	no flood that's not permanent water	yes	otsu extends standard		yes
3327	Bangladesh, India	yes	no	yes		yes	otsu extends standard	yes	yes
3328	South Africa	yes	yes	somewhat	spec of flood	yes	no standard	no - random pattern	yes
3329	United Kingdom	yes	no	somewhat	spec of flood	yes	no standard	no - random pattern	yes
3330	Indonesia	yes	yes	somewhat	very little flood that's not permanent water	yes	almost the same	yes	yes
3331	Algeria	yes	no	yes		yes	no standard	no - random pattern	yes
3332	Mexico	yes	no	yes		yes	otsu extends standard	yes	yes
3333	Taiwan	no	yes	no	no flood	no otsu	no standard		yes
3334	Liberia	yes	no	no	marginal	yes		no	maybe
3335	Chile,Argentina	yes	yes	maybe	small areas near rivers flood	no	standard more		no
3336	United States, Mexico	yes	no	yes	good floods	yes		random	yes
3337	Ukraine, Romania	yes	no	maybe	small areas	yes			yes
3338	Nepal, India	yes	no	yes	great	yes			yes
3339	Taiwan, Philippines	yes	no	yes	small areas	yes			yes
3340	United States	yes	no	yes	good floods	yes			maybe
3341	Canada	yes	no	no	marginal	yes			yes
3342	New Zealand	yes	no	no	marginal	yes			yes
3343	Mauritania, Mali, Togo, Burkina Faso, Ghana	yes	no	maybe	o	yes			yes
3344	Japan	yes	yes	no	modis missing area in dfo, no flooding	yes			no
3345	China	yes	yes	yes	good flood along river it seems	maybe	some areas standard had more area	yes	yes
3346	Canada	yes	no	no	marginal over perm water	yes			no
3347	Pakistan	yes	yes	maybe/no	small floods but looks like urban land	yes	no standard to compare		no
3348	Chad, Cameroon	yes	no	yes		yes		yes	yes
3349	Ghana, Togo, Benin	no	yes	no	no floods detected	yes			no
3350	Iran	yes	no	no	detecting volcanic (black) area	yes	no standard detected		yes
3351	South Sudan	no	yes	no	large portion of modis missing, no flood in dfo	no			maybe
3352	United Kingdom, Scotland	yes	no	no	marginal	yes			no
3353	China, Laos	yes	no	maybe	marginal single pixel floods	yes			yes
3354	China	yes	no	maybe	farmland near city scattered floods	yes			yes
3355	Vietnam	yes	no	maybe	flood near river but perm water not classified	yes			yes
3356	India, Bangladesh	yes	no	yes	large flood/farmland	yes			yes
3357	United States	yes	yes	no	over perm water	yes			yes
3358	United States	yes	no	no	over perm water/marginal	yes			yes
3359	Pakistan	yes	no	yes		yes		yes	yes
3360	Laos, Thailand	yes	no	yes	great flood event	yes			yes
3361	Ireland, UK	no	no	no	no flooding in dfo	yes			no
3362	Haiti, Dominican Republic	yes	no	no	marginal, overp erm water	yes			no
3363	United States	no	no	no	small dfo, no flood	yes			no
3364	United States, Mexico	yes	no	no	marginal floods	yes			no
3365	Nepal, India	yes	no	yes	good river flood	yes			maybe
3366	United States	yes	no	yes		yes			yes
3367	South Sudan, Ethiopia	yes	no	yes	looks like large flood event	yes			yes
3368	Chad	yes	no	yes	good	yes			maybe
3369	Haiti, Dominican Republic	yes	no	maybe	west portion of dfo	yes			no
3370	United States	yes	no	yes	flooding near coastal waters due to large storm	yes			yes
3371	Bangladesh	yes	no	yes	large flood	yes		yes	yes
3372	India	yes	no	yes		yes			yes
3373	Haiti, Dominican Republic	no	no	no	no flood in dfo	yes			no
3374	Indonesia	yes	no	no	over perm water	yes			no
3375	Malaysia	yes	no	no	marginal	yes		no lake	no
3376	England, UK	yes	no	maybe	spots of floods	yes			yes
3377	Iran	yes	yes	no	mapping factories*industrial area as flood	yes			yes
3378	Iraq	yes	yes	no	over perm water	yes			yes
3379	United States	yes	no	maybe	spots of floods	yes			yes
3380	Taiwan	yes	yes	no	over urban area	yes			no
3381	Puerto Rico	no	no	no	no flood in dfo				yes
3382	India	yes	no	yes		yes		yes	no
3383	India	yes	no	yes		yes		yes	no
3384	Thailand, Laos	yes	no	yes		yes			maybe
3385	Vietnam	yes	yes	no	over perm water	yes			no
3386	Guatemala	yes	yes	no	over perm water	yes			maybe
3387	China	yes	no	maybe	coastal	yes			no
3388	Mexico	yes	no	no	no floods	yes			no
3389	Algeria	no	yes	no	no flood in dfo				yes
3390	Sudan, South Sudan	yes	no	maybe	wetland flood	yes			no
3391	Nicaragua	yes	yes	no	no floods	yes			maybe
3392	Rwanda	yes	yes	no	no flood	yes			no
3393	China	yes	no	no	marginal	yes			yes
3394	Ethiopia, Somalia, Kenya	yes	no	yes		yes			yes
3395	Nicaragua, Costa Rica	yes	no	maybe	coastal	yes			maybe
3396	Vietnam	yes	no	no	no floods	yes			no
3397	Belize, Guatemala, Honduras	yes	no	no	marginal flooding in dfo, more outside	yes			maybe
3398	Yemen	no	yes	no	no flood in dfo				no
3399	Morocco	yes	no	no	marginal flooding in dfo	yes			maybe
3400	Vietnam	yes	no	no	over urban area	yes			yes
3401	Somalia	yes	yes	maybe	small flood specks	yes			no
3402	Kenya	yes	yes	no	over perm water and no otsu layer				no
3403	United States	yes	no	no	only perm water	yes			yes
3404	Somalia	No	No	yes	No flooding	Does not exist	None	No	Yes
3405	South Africa	yes	no	yes		yes			no
3406	Australia	yes	no	maybe	some flooding farmland*	yes			yes
3407	Cuba	yes	no	maybe	perm water area	maybe			yes
3408	Vietnam	yes	no	no	marginal	yes			yes
3409	Philippines	no	no	no	no flood in dfo	yes			yes
3410	Australia	yes	no	no	perm water	yes			no
3411	Venezuela	yes	no	maybe	near perm water small	yes			yes
3412	Brazil	yes	no	maybe	mostly over perm water	yes			maybe,no
3413	Sri Lanka	yes	no	yes		yes			yes
3414	Italy	yes	no	maybe	coastal flood , perm water	no			no
3415	Philippines	no	no	no	no flooding in dfo	yes			no
3416	Thailand	yes	yes	no	over perm water	yes			yes
3417	Malaysia	yes	no	maybe	small flood area	yes			maybe
3418	Italy	no	no	no	perm water	yes			yes
3420	England, UK	yes	no	maybe	small section	yes			yes
3421	Colombia	yes	no	yes		yes			no
3422	Guyana	yes	no	yes	good	yes			maybe
3423	United States	yes	no	maybe	surrounding perm water	yes			yes
3424	United States	no	no	no	no flooding in dfo				no
3425	Brazil	yes	no	yes		yes			maybe
3426	Mozambique	Yes	No	Yes	None	Yes	Much bigger, seems correct	Yes	Yes
3427	Philippines	Yes	Yes	Yes	None	Yes	Otsu picks up some ag field standard does not	No	Yes
3428	Australia	Yes	No	No	Limited flooding	Yes	Otsu slightly bigger, barely expands on standard	No	Yes
3429	Thailand	No	No	No	No flooding	No	None	No	Yes
3430	United States	Yes	Yes	No	Limited flooding	No	None	No	Yes
3431	Vietnam	Yes	Yes	No	Otsu Errors	Yes	Only Otsu showing floding	No	Yes
3432	Fiji	No	No	No	No flooding	No	None	No	Yes
3433	France	No	No	No	No flooding	No	None	No	Yes
3434	Romania	No	No	No	No flooding	No	None	No	Yes
3435	Dominican Republic	No	Yes	No	No flooding	No	None	No	Yes
3436	Brazil	yes	no	yes	some flooding along rivers and other bodies of water	yes	otsu picks up scattered flooding that standard does not	yes	yes
3437	Phillipines	yes	no	yes	floodings found on farmlands	yes	More otsu cells are found arond standard cells		no
3438	Australia	yes	no	no	not much floodings	yes	More otsu cells are found on farmlands		no
3439	Australia	yes	no	no	not much floodings	no	standard cells are bigger		no
3440	Algeria	No	No	No	No flooding	No	None	No	Yes
3441	Madagascar	Yes	Yes	Yes	None	Yes	Otsu slightly bigger, barely expands on standard	No	Yes
3442	Indonesia	No	No	No	No flooding	No	None	No	Yes
3443	Malaysia	Yes	Yes	No	Limited flooding	Yes	Otsu slightly bigger, barely expands on standard	No	Yes
3444	Philippines	Yes	Yes	Yes	None	No	None	No	Yes
3445	Morocco	Yes	Yes	Yes	None	Yes	Main areas overlap, some isolated Otsu speckles	No	Yes
3446	Dominican Republic	Yes	Yes	Yes	None	No	None	No	Yes
3447	England	Yes	Yes	No	Limited flooding	Yes	Otsu speckles in ice regions	No	Yes
3448	Brazil	Yes	No	Yes		Yes	None	No	Yes
3449	United States	No	Yes	No	No flooding	No	None	No	Yes
3450	Solomon Islands	No	No	No	No flooding	No	None	No	Yes
3451	Brazil	Yes	Yes	No	Limited flooding	Yes	Otsu slightly bigger, barely expands on standard	No	Yes
3452	Colombia	Yes	Yes	Yes	None	Yes	Otsu slightly bigger, barely expands on standard	No	Yes
3453	Brazil	No	Yes	No	No flooding	No	None	No	Yes
3454	Angola	Yes	No	Yes	None	Yes	Otsu picks up some ag field standard does not	No	Yes
3455	Costa Rica	No	Yes	No	No flooding	No	None	No	Yes
3456	Bosnia	Yes	Yes	No	Limited flooding	Yes	None	No	Yes
3457	Brazil	Yes	No	Yes	None	Yes	Otsu picks up some ag field standard does not	No	Yes
3458	Indonesia	No	No	No	No flooding	No	None	No	Yes
3459	South Africa	yes	no	no	not much floodings	no	same size		no
3460	United States	yes	no	no	not much floodings	yes	more otsu cells		no
3461	Mozambique	yes	no	no	not much floodings	yes	more otsu cells		no
3462	Angola, Namibia	yes	no	yes	significant floodings	yes	more otsu cells		no
3463	Brunei, Malaysia	yes	no	no	not much floodings	yes	more otsu cells		yes
3464	United States, Canada	yes	no	yes	significant floodings	no	same size		no
3465	Malaysia	yes	no	yes		yes	more ostu along coast line		no
3466	Indonesia	yes	no	no		yes	more otsu around standard		no
3467	Namabia,Zambia,Zimbabwe, Botswana, angola	yes	yes	yes	significant floodings on dryland	no	same size		no
3468	Australia	yes	no	no	not much floodings	no	no otsu		no
3469	United States	yes	no	no	not much floodings	yes	otsu slightly bigger		no
3470	Canada	yes	no	no	almost no flooding	no	about the same	no - looks more like a reservoir or lake	yes
3471	Afghanistan	yes	yes	no	no flooding	no otsu present			yes
3472	Burundi	yes	no	no	almost no flooding	no	no difference	no - looks more like a reservoir or lake	yes
3473	Indonesia	yes	no	maybe	cloudy but some flooding	yes	otsu larger	no - looks more like a reservoir or lake	yes
3474	United States	yes	no	yes	good flooding detected	yes	picked up flooding that standard did not	no - random pattern	yes
3475	Brazil	yes	no	maybe	cloudy but some flooding	yes	picked up flooding that standard did not	no - random pattern	no
3476	United States	yes	yes	yes	good flooding detected	no	not much difference	yes	yes
3477	Philippines	yes	no	no	not much flooding	yes	picked up flooding that standard did not	no - random pattern	yes
3478	United States	yes	no	no	cloudy and little flooding	yes	picked up flooding that standard did not	no - random pattern	no
3479	Afghanistan	yes	no	no	only 1 pixel detected as flooded	yes	picked up flooding that standard did not	no - random pattern	no
3480	Australia	yes	no	maybe	some scattered flooding	yes	picked up flooding that standard did not	no - random pattern	no
3481	China	yes	no	no	completely cloudy and little flooding	yes	picked up flooding that standard did not	no - random pattern	yes
3482	Tajikistan	yes	no	maybe	some decent flooding despite being cloudy	yes	picked up flooding that standard did not	no - looks more like a reservoir or lake	no
3483	Haiti	yes	no	no	cloudy and little flooding	yes	picked up flooding that standard did not	no - random pattern	no
3484	United States	yes	no	maybe	cloudy but some decent sized floods	yes	otsu larger	no - random pattern	yes
3485	India	yes	no	yes	lots of flooding	yes	otsu larger	yes	yes
3486	Ghana	yes	no	no	cloudy and little flooding	yes	picked up flooding that standard did not	no - random pattern	yes
3487	Cote d'lvoire	yes	no	no	cloudy and little flooding	yes	picked up flooding that standard did not	yes	no
3488	United States	yes	no	no	cloudy and little flooding	yes	picked up flooding that standard did not	no - looks more like a reservoir or lake	no
3489	China	yes	no	maybe	some scattered flooding	yes	picked up flooding that standard did not	no - random pattern	yes
3490	Guatemala, El Salvador, Honduras, Nicaragua	yes	no	yes	good flooding	yes	picked up flooding that standard did not	other	no
3491	Austria, Czechia	yes	no	no	cloudy and little flooding	yes	picked up flooding that standard did not	no - random pattern	yes
3492	Poland, Czechia, Slovakia	yes	no	no	too cloudy and not much flooding	yes	picked up flooding that standard did not	no - random pattern	no
3493	Namibia, Botswana	yes	no	yes	good flooding	no	otsu smaller	no - random pattern	yes
3494	Vietnam, Laos	yes	no	yes	lots of flooding	yes	picked up flooding that standard did not	no - random pattern	yes
3495	India	yes	no	yes	flooding along river	yes	otsu larger	yes	no
3496	India	yes	no	yes	flooding along river	yes	otsu larger	yes	no
3497	India	yes	no	no	too cloudy and not much flooding	yes	picked up flooding that standard did not	no - random pattern	yes
3498	China	maybe	yes	no	completely cloudy	yes	picking up coastal flooding	no	yes, although it appears there are several rainstorms right in a row so not sure which one it is supposed to match too
3499	Benin	No	No	No	No flooding	Does not exist	None	No	Yes
3501	Ghana	No	No	No	No flooding	Does not exist	None	No	Yes
3502	Mexico	No	No	No	No flooding	Does not exist	None	No	Yes
3503	South Africa	Yes	Yes	No	Limited flooding	Does not exist	None	No	Yes
3504	India	maybe	yes - cloudy. There is a very tiny amount of "flooded" pixels picked up by they appear randomly seeded throughout the image and the image is completely cloudy	no	completely cloudy	only otsu is picked up, so yes	otsu is picking up floods, but they look wrong because they are from very cloudy pixels	no	yes, although it appears there are several rainstorms right in a row so not sure which one it is supposed to match too
3505	Malaysia	No	Yes	No	Heavy clouds, no flooding	Does not exist	None	No	Yes
3506	Philippines	No	Yes	No	Heavy clouds, no flooding	Does not exist	None	No	Yes
3507	Bosnia	No	No	No	No flooding	Does not exist	None	No	Yes
3508	India	too cloudy to tell	yes - cloudy. There is a very tiny amount of "flooded" pixels picked up by they appear randomly seeded throughout the image and the image is completely cloudy	no	completely cloudy	otsu has some returns, probably false	no floods were pickd up with standard method
3509	Austria	no flooded pixels were detected in the polygon		no					Looks like peak precip was on 7/15, but DFO says flood starts 7/16
3510	England	No	Yes	No	No flooding	Does not exist	None	No	Yes
3511	Mongola	yes	cloudy	maybe	very cloudy	bigger	the only flooded pixels identified here are the permanent water bodies - hard to say if they are floods or not	no	DFO Date: June 16 - 99. Precip events on July 13th and 23-25
3512	Japan	yes	yes	don[t think so unless this flood is about country-wide sea level rise?	cloudy	Yes	Otsu seems to be mapping pixels around the coastlines or edges of the land mass	no	Peak precip: July 24, DFO says July 20 - 22
3513	Turkey	no flooded pixels were detected in the polygon	clouds	no	cloudy	nA	NA	NA	DFO dates are in between two storms. No peak precip during DFO windows, rather on both sides
3514	China	yes	yes	no	clouds	Yes	a few small Otsu false positives sprinkled around with no connectivity over a cloudy raster		Yes, it was raining during that time, but the peak precip appears on Aug 4, after dFO said the event ended?
3515	Japan	no	yes	no	clouds	no otsu	NA	NA	No, peak precip is two days before DFO start date
3516	Nepal	No	Yes	No	No flooding	Does not exist	None	No	Yes
3517	Nepal	No	Yes	No	No flooding	Does not exist	None	No	Yes
3518	Philippines	Yes	Yes	Yes	None	Does not exist	None	No	Yes
3519	Nepal	No	Yes	No	No flooding	Does not exist	None	No	Yes
3520	Philippines	No	Yes	No	No flooding	Does not exist	None	No	Yes
3521	China	No	Yes	No	Heavy clouds, no flooding	Does not exist	None	No	Yes
3522	Taiwan	No	Yes	No	Heavy clouds, no flooding	Does not exist	None	No	Yes
3523	Japan	No	Yes	No	Heavy clouds, no flooding	Does not exist	None	No	Yes
3524	Sierra Leone	no	yes	no	no floods detected, very cloudy	NA	NA	NA	Yes
3525	United States	yes*	yes	maybe	clouds, it is picking up permanent wtaerbodies	yes	Otsu and standard both pick up what look like some permanent waterbodies	Yes	Yes
3526	Pakistan	no	yes	no	DFO polygon seems very strange	Yes		No, but pixels outside the polygon do	Sort of - Precip is Aug 8 - 19, DFO says only 8/15-17
3527	Laos	No	yes	no	clouds	NA	NA	NA	Try Aug 7th as a start date instead of August 8th
3528	Sri Lanka	Yes	Yes	no	clouds plus what looks like Otsu false positives	Yes	Otsu false positives	NA	Yes
3529	Nepal	Yes	no	probably	very cloudy, but still picks up river	Yes	Otsu picks up a lot more flooded pixels	Yes, some of floods look networked. Others might be overpredicting from clouds?	Yes
3530	India	Yes	yes	YES		Yes		Yes	Seems like there is a precip peak a copule days before the DFo start date but yes, it is raining during this time
3531	Senegal	Yes	yes	yes	pretty cloudy	Yes		kinda of -this looks like coastal/river delta flooding	Yes
3532	India/Nepal	Yes	yes	maybe	very cloudy, only a few flooded pixels	yes		no	yes
3533	Sudan	Barely	yes - almost no flooding detected	maybe	if you lived in the park that was flooded in Khartoum	Yes		No	yes
3534	West Africa - Mali	Yes	no	yes		yes		yes	yes
3535	China	Yes	yes	maybe	looks like it is just picking up permanent water?	no otsu		no	yes
3536	Istanbul	Yes	No	yes		yes		no	yes
3537	Phillipines	yes	yes	maybe	only picked up flooded in one small reservoir	yes		no	Yes
3538	Mexico (mexico city)	yes	yes	maybe	seems to only be picking up permanent water	seems the same		no -looks more like lakes	could extend past 9/10 to 9/12
3539	India	yes	yes	maybe		yes		yes	yes
3540	Nigeria	yes	yes	maybe	small flood extent identified	yes		yes	yes
3541	Indonesia	yes	yes	no	flood extent in middle of reservoir	yes		no	yes
3542	Ghana	yes	yes	maybe	over permanent water	no actually - standard is bigger		yes	raining continues until 9/23
3543	Mexico	yes	yes	yes		yes		more like bathtub rings	yes
3544	United States	yes	no	yes		same		yes	yes
3545	Vietnam	yes	yes	maybe	only maps a tiny bit of flooding by the city Hue	yes		no	yes
3546	Spain	no	yes	no	no mapped flood	na	na	no	event ended a few days after DFo end date
3547	Philippines	yes	yes	maybe	clouds	no	different - both capture different spots	no	no -rainfall was slightly after
3548	Vietnam	yes	yes	maybe	some coastal flooding over very cloudy MODIS images -not sure if it is real	yes		no	yes
3549	main country (or multiple) where flooding is occuring	No	No	No	Does not exist	Does not exist	None	No	Does not exist
3550	Italy	yes	yes	maybe	only coastal edges	yes		no	yes - dates could be stretched a couple days longer
3551	India	yes	no	yes		yes		yes	yes
3552	Philippines	yes	no	yes		yes		yes	yes
3553	Nepal/India (Utterkhand)	yes	yes	yes		yes		yes	yes
3554	Japan	yes	yes	no	only mapping permanent waterbodies				yes, capture peak but rain started a couple days earlier
3555	Nigeria	yes	yes	yes	seems to be only gap-filling the JRC data -maybe not actually adding any new truly flooded pixels	yes		yes	yes
3556	Niger	yes	no	maybe	not a lot of flooded pixels	yes		no	sort of DFO goes too long
3557	Kenya/Somalia/Ethiopia	yes	yes	probably not	looks like watermelon seeds - rando detections all over with no pattern	yes		no	storm went for a couple days after DFO cut off
3558	Vietnam	yes	yes	no	only mapping permanent waterbodies	yes		no	no - storm started before DFO start date
3559	Paraguay	yes	yes	yes	DFO polygon too small	yes		yes	no - storm started before DFO start date
3560	Vietnam	yes	yes	probably not	flooding outside o DFO polygon; also some flooded pixels inside polygon but appear to be permanent water			yes	yes
3561	United Kingdom	no	yes	no	DFO polygon too small, weird shape			no	yes although storm started before DFO start date
3562	Mexico	yes	yes	maybe	clouds - inconsistent retrievals	yes		yes	yes
3563	El Salvador	yes	yes	no	mapping permanent water	yes		no	yes although storm started before DFO start date
3564	Australia	yes	yes	no	mapping permanent water	yes		no	no storm started 2 days before DFO
3565	Thailand	yes	yes	maybe	flooded pixels are in urban area - correct or false positive?	yes		no	peak precip started 2 days before DFO
3566	India	yes	yes	no	only mapping over permanent water			no	precip continued several days after DFO end date
3567	United States	yes	no	yes		no			yes
3568	Brazil	yes	yes	no	only mapping over permanent water	no			yes
3569	Tanzania	no	yes	no	only mapped one tiny reservoir already ID'ed as permanent water	yes		no	no, rain actually started 5 days earlier
3570	Malaysia	yes	maybe	maybe	urban flooding	yes		no	no, Nov 5 peak and Nov 21 peak, DFO much smaller window in the middle.
3571	Spain	yes	yes	no	coastal fringe, no other pixels marked flooded	yes		no	peak precip started 2 days before DFO
3572	Argentina	yes	no	yes		yes			yes
3573	Ireland and UK	yes	yes	maybe	very cloudy	yes		a little bit	yes
3574	Singapore	no	yes	no	cloudy, no flood detected			no	DFO dates could be extended a couple days
3575	Turkey	no	yes	no	picking up coastal fringe	yes		no	precip started a day earlier
3576	Sri Lanka	yes	yes	no	picking up coastal fringe	yes		no	precip started a couple days earlier
3577	Uruguay	yes	yes	yes	DFO polygon missed it - good flooding detected nearby	yes		yes	biggest rain actually 5 days before DFO start date
3578	Malaysia	yes	yes	no	mapping permanent water	yes		no	biggest rain 10 days after DFO window
3579	Saudi Arabia	no	yes	no	no floods detected			no	yes
3580	United States	no	yes	no	only a few pixels that are permanent water			no	storm continues after DFo dates
3581	Fiji	no	yes	no	no floods detected			no	yes
3582	Sri Lanka	yes	yes	no	mapping permanent water	yes			yes
3583	Peru	no	yes	no
3584	Tanzania	yes	yes	no	mapping permanent water	yes			no - peak precip 2 days before
3585	Morocco	no	yes	no
3586	Australia	yes	yes	no	no otsu layer loaded	no	no otsu at all	yes	no - rain before and after DFO dates
3587	Italy	yes	yes	no	mapping permanent water	no	no otsu layer	no	yes
3588	Brazil	yes	yes	no	mapping permanent water	no	no otsu layer	no	yes
3589	Kenya	yes	yes	maybe	mapping permanent water - a few extra spots identified as flooded though above and beyond JRC	no	no otsu layer	no	yes
3590	Australia	yes	yes	yes	MODIS picks up lots of non-JRC permanent water pixels	no	no otsu layer	yes	no precip started several days earlier than Otsu start date
3591	Bosnia	yes	yes	yes	MODIS picks up lots of non-JRC permanent water pixels	no	no otsu layer	more like ponds	yes
3592	Costa Rica/Panama	no	yes	no	mapping permanent water - a few extra spots identified as flooded though above and beyond JRC	no	no otsu layer		yes
3593	Bolivia	no	yes	no	no flood detected	no	no otsu layer		yes
3594	Egypt	yes	yes	no	mapping permanent water - a few extra spots identified as flooded though above and beyond JRC	no	no otsu layer	no	yes
3595	United States	yes	yes	no	mapping permanent water - a few extra spots identified as flooded though above and beyond JRC	no	no otsu layer	no	no - rain started 1 day earlier
3596	Brazil	yes	yes	no	mapping permanent water - a few extra spots identified as flooded though above and beyond JRC	no	no otsu layer	yes	yes
[truncated: 1,031 more rows]
[truncated: 1 more columns]
